# Supplementary material for: The network interplay of type 1 interferon and toll-like receptor signaling cascades hallmarks the immune response against Candida spp. infections
Source: Research Square preprint supplement (doi:10.21203/rs.3.rs-279551/v1), 2021-03-02
Supplement: Supplementary file 2 [file 2311b1d727ad14a1c2c81616.xlsx]

## Sheet: README
Supplementary Material_Tables S1-S23
Supplementary Table S1. ORA pathways enriched by DEGs from GSE42606 (PBMCs) .
Supplementary Table S2. Common DEGs associated with Interferon and Toll-like Receptor signaling cascades detected by CEMiTool (Modular gene co-expression) and ClusterProfiler (ORA) analyses.
Supplementary Table S3. Meta-significant genes among WBCs and PBMCs datasets (GSE65088, GSE114180, GSE42606 and GSE154911).
Supplementary Table S4. log2FC and adjusted p-value of 44 genes in common between the WBCs (GSE65088, GSE114179) and PBMCs (GSE42606, GSE154911) datasets.
Supplementary Table S5. Enrichment generated by EnrichR (ref. BioPlanet) of 44 genes in common between WBCs (GSE65088, GSE114179) and PBMCs (GSE42606, GSE154911) datasets.
Supplementary Table S6. Table used for GOPlot association between 44 DEGs and pathways in common across WBCs (GSE65088, GSE114179) and PBMCs (GSE42606, GSE154911).
Supplementary Table S7. Loading values obtained by multi-factory study analyses of both common factors found between GSE65088 and GSE42606 mutual DEGs.
Supplementary Table S8. List of shared biological processes among all datasets (GSE65088, GSE114179, GSE42606, GSE154911, E-MTAB-135, E-MTAB-751, GSE77969) generated by ClusterProfiler.
Supplementary Table S9. List of shared biological processes and their associated DEGs among all datasets (GSE65088, GSE114179, GSE42606, GSE154911, E-MTAB-135, E-MTAB-751, GSE77969) generated by ClusterProfiler.
Supplementary Table S10. Number of DEGs and adj. p-value enriching each shared biological processes among all datasets (GSE65088, GSE114179, GSE42606, GSE154911, E-MTAB-135, E-MTAB-751, GSE77969).
Supplementary Table S11. Pathways and respective number of DEGs as well as adj. p-value obtained from ORA enrichment (related to MAPK, Interferon and Virus response, JAK-STAT and NF-kB).
Supplementary Table S12. Gene symbol, name, and function of genes modulated by C. albicans immune response found across all datasets investigated (total of 1096).
Supplementary Table S13. Genes modulated by C. albicans immune response found across all datasets investigated (total of 1096) and Reactome enrichment analysis performed using Cytoscape.
Supplementary Table S14. Correlation metrics of genes associated with Interferon and Toll-like Receptor signaling cascades of uninfected cells (GSE42606).
Supplementary Table S15. Correlation metrics of genes associated with Interferon and Toll-like Receptor signaling cascades of C. albicans-stimulated cells (GSE42606).
Supplementary Table S16. Expression values (Counts) of uninfected and C. auris-infected PBMCs (GSE154911).
Supplementary Table S17. ORA pathways enriched by DEGs when comparing uninfected and C. auris-infected PBMCs (GSE154911).
Supplementary Table S18. ORA pathways enriched by DEGs in common between C. albicans-stimulated genes (1096) and uninfected as well as C. auris-infected PBMCs (GSE154911).
Supplementary Table S19. Transcriptional evidences associating the 1096 genes found across datasets with Interferon types.
Supplementary Table S20. ORA pathways related to genes in common between C. albicans-stimulated genes (1096) across all datasets and inborn errors of immunity associated to candidiasis.
Supplementary Table S21. Sources of literature associating inborn errors of immunity and pathways related to candidiasis.
Supplementary Table S22. Expression values (Counts) of IFN-associated genes for Uninfected and C. albicans-infected PBMCs (GSE42606).
Supplementary Table S23. Expression values (Counts) of TLR-associated genes for Uninfected and C. albicans-infected PBMCs (GSE42606).

## Sheet: Table S1
Supplementary Table S1. ORA pathways enriched by DEGs from GSE42606 (PBMCs) .
ID	Description	GeneRatio	BgRatio	pvalue	p.adjust	qvalue	geneID	Count
R-HSA-913531	Interferon Signaling	47/229	199/10654	2.50078e-36	1.50797e-33	1.3083e-33	ADAR/TRIM22/IRF9/IFITM3/IFI30/IFITM2/USP18/GBP4/GBP5/DDX58/IFI6/GBP1/IRF8/IFI35/IFIT2/IFIT1/IFIT3/IFNB1/IFNG/IRF1/IRF7/ISG20/MT2A/MX1/MX2/OAS1/OAS2/OAS3/HERC5/PML/XAF1/EIF2AK2/PSMB8/TRIM21/STAT1/STAT2/BST2/TRIM25/TRIM8/IFITM1/TRIM5/OASL/SOCS1/SOCS3/RSAD2/UBE2L6/ISG15	47
R-HSA-909733	Interferon alpha/beta signaling	31/229	69/10654	4.96333e-34	1.49644e-31	1.2983e-31	ADAR/IRF9/IFITM3/IFITM2/USP18/IFI6/IRF8/IFI35/IFIT2/IFIT1/IFIT3/IFNB1/IRF1/IRF7/ISG20/MX1/MX2/OAS1/OAS2/OAS3/XAF1/PSMB8/STAT1/STAT2/BST2/IFITM1/OASL/SOCS1/SOCS3/RSAD2/ISG15	31
R-HSA-6783783	Interleukin-10 signaling	21/229	47/10654	2.89981e-23	5.82862e-21	5.05687e-21	CSF2/FPR1/CXCL1/CXCL2/IL1A/IL1B/IL1RN/IL6/CXCL8/IL12B/CXCL10/CCL4L1/CCL3L3/PTGS2/CCL2/CCL3/CCL3L1/CCL20/TNF/CCR2/CD86	21
R-HSA-449147	Signaling by Interleukins	47/229	461/10654	1.21406e-19	1.83019e-17	1.58786e-17	CEBPD/BATF/MAP3K8/CSF1R/CSF2/CLCF1/FOS/FPR1/CXCL1/CXCL2/IL19/IFNG/IL1A/IL1B/IL1RN/IL2RA/IL6/CXCL8/IL12B/CXCL10/IRAK2/CCL4L1/CCL3L3/MYC/NFKB1/NFKBIA/SERPINB2/PIM1/IL36G/PSMB8/PTGS2/RPS6KA1/CCL2/CCL3/CCL3L1/CCL20/STAT1/STAT2/TNF/CCR2/MAPKAPK3/SOCS1/RIPK2/IL18RAP/SOCS2/SOCS3/CD86	47
R-HSA-877300	Interferon gamma signaling	23/229	92/10654	1.10554e-18	1.33329e-16	1.15675e-16	TRIM22/IRF9/IFI30/GBP4/GBP5/GBP1/IRF8/IFNG/IRF1/IRF7/MT2A/OAS1/OAS2/OAS3/PML/TRIM21/STAT1/TRIM25/TRIM8/TRIM5/OASL/SOCS1/SOCS3	23
R-HSA-380108	Chemokine receptors bind chemokines	16/229	59/10654	5.94285e-14	5.97256e-12	5.18174e-12	CXCL1/CXCL2/CXCL8/CXCL10/CCL4L1/CCL3L3/CXCL9/CCL2/CCL3/CCL3L1/CCL7/CCL20/CXCL11/CXCL5/CCR2/CCRL2	16
R-HSA-1169410	Antiviral mechanism by IFN-stimulated genes	15/229	80/10654	1.17483e-10	1.01204e-08	8.78034e-09	USP18/DDX58/IFIT1/MX1/MX2/OAS1/OAS2/OAS3/HERC5/EIF2AK2/STAT1/TRIM25/OASL/UBE2L6/ISG15	15
R-HSA-6785807	Interleukin-4 and Interleukin-13 signaling	16/229	108/10654	1.08429e-09	8.17282e-08	7.09067e-08	CEBPD/BATF/FOS/IL1A/IL1B/IL6/CXCL8/IL12B/MYC/PIM1/PTGS2/CCL2/STAT1/TNF/SOCS1/SOCS3	16
R-HSA-375276	Peptide ligand-binding receptors	20/229	201/10654	1.11075e-08	7.44201e-07	6.45663e-07	EDN1/FPR1/FPR3/CXCL1/CXCL2/CXCL8/CXCL10/CCL4L1/CCL3L3/CXCL9/CCL2/CCL3/CCL3L1/CCL7/CCL20/CXCL11/CXCL5/C5AR1/CCR2/CCRL2	20
R-HSA-1169408	ISG15 antiviral mechanism	11/229	72/10654	3.39536e-07	2.0474e-05	1.77631e-05	USP18/DDX58/IFIT1/MX1/MX2/HERC5/EIF2AK2/STAT1/TRIM25/UBE2L6/ISG15	11
R-HSA-168928	DDX58/IFIH1-mediated induction of interferon-alpha/beta	11/229	78/10654	7.8029e-07	4.22871e-05	3.66879e-05	DDX58/IFNB1/IRF7/NFKB1/NFKBIA/HERC5/IFIH1/TRIM25/DHX58/UBE2L6/ISG15	11
R-HSA-373076	Class A/1 (Rhodopsin-like receptors)	23/229	335/10654	8.41534e-07	4.22871e-05	3.66879e-05	ADORA2A/EDN1/FPR1/FPR3/FFAR2/CXCL1/CXCL2/CXCL8/CXCL10/CCL4L1/CCL3L3/CXCL9/PTGER2/CCL2/CCL3/CCL3L1/CCL7/CCL20/CXCL11/CXCL5/C5AR1/CCR2/CCRL2	23
R-HSA-168181	Toll Like Receptor 7/8 (TLR7/8) Cascade	11/229	93/10654	4.60802e-06	0.000198474	0.000172194	MAP3K8/TICAM1/FOS/IRAK2/IRF7/NFKB1/NFKBIA/TLR7/RPS6KA1/MAPKAPK3/RIPK2	11
R-HSA-975155	MyD88 dependent cascade initiated on endosome	11/229	93/10654	4.60802e-06	0.000198474	0.000172194	MAP3K8/TICAM1/FOS/IRAK2/IRF7/NFKB1/NFKBIA/TLR7/RPS6KA1/MAPKAPK3/RIPK2	11
R-HSA-168164	Toll Like Receptor 3 (TLR3) Cascade	11/229	94/10654	5.12125e-06	0.000205874	0.000178615	MAP3K8/TICAM1/FOS/BIRC3/IRAK2/IRF7/NFKB1/NFKBIA/RPS6KA1/MAPKAPK3/RIPK2	11
R-HSA-168898	Toll-like Receptor Cascades	14/229	155/10654	5.97691e-06	0.000225255	0.000195429	MAP3K8/TICAM1/CTSL/FOS/BIRC3/IRAK2/IRF7/NFKB1/NFKBIA/TLR7/RPS6KA1/MAPKAPK3/SOCS1/RIPK2	14
R-HSA-168138	Toll Like Receptor 9 (TLR9) Cascade	11/229	97/10654	6.97245e-06	0.000247317	0.00021457	MAP3K8/TICAM1/FOS/IRAK2/IRF7/NFKB1/NFKBIA/TLR7/RPS6KA1/MAPKAPK3/RIPK2	11
R-HSA-918233	TRAF3-dependent IRF activation pathway	5/229	14/10654	7.50575e-06	0.000251443	0.00021815	DDX58/IFNB1/IRF7/IFIH1/TRIM25	5
R-HSA-166166	MyD88-independent TLR4 cascade	11/229	99/10654	8.50894e-06	0.000256544	0.000222576	MAP3K8/TICAM1/FOS/BIRC3/IRAK2/IRF7/NFKB1/NFKBIA/RPS6KA1/MAPKAPK3/RIPK2	11
R-HSA-937061	TRIF(TICAM1)-mediated TLR4 signaling	11/229	99/10654	8.50894e-06	0.000256544	0.000222576	MAP3K8/TICAM1/FOS/BIRC3/IRAK2/IRF7/NFKB1/NFKBIA/RPS6KA1/MAPKAPK3/RIPK2	11
R-HSA-912694	Regulation of IFNA signaling	6/229	26/10654	1.48306e-05	0.000425851	0.000369464	USP18/IFNB1/STAT1/STAT2/SOCS1/SOCS3	6
R-HSA-166016	Toll Like Receptor 4 (TLR4) Cascade	12/229	129/10654	2.07787e-05	0.000569527	0.000494117	MAP3K8/TICAM1/FOS/BIRC3/IRAK2/IRF7/NFKB1/NFKBIA/RPS6KA1/MAPKAPK3/SOCS1/RIPK2	12
R-HSA-975138	TRAF6 mediated induction of NFkB and MAP kinases upon TLR7/8 or 9 activation	10/229	92/10654	2.66966e-05	0.000699916	0.000607242	MAP3K8/TICAM1/FOS/IRAK2/NFKB1/NFKBIA/TLR7/RPS6KA1/MAPKAPK3/RIPK2	10
R-HSA-5213460	RIPK1-mediated regulated necrosis	5/229	20/10654	5.23031e-05	0.00126155	0.00109451	MLKL/BIRC3/FAS/TNFSF10/CFLAR	5
R-HSA-5218859	Regulated Necrosis	5/229	20/10654	5.23031e-05	0.00126155	0.00109451	MLKL/BIRC3/FAS/TNFSF10/CFLAR	5
R-HSA-936440	Negative regulators of DDX58/IFIH1 signaling	6/229	34/10654	7.50282e-05	0.00174008	0.00150968	DDX58/HERC5/IFIH1/TRIM25/UBE2L6/ISG15	6
R-HSA-933542	TRAF6 mediated NF-kB activation	5/229	24/10654	0.000133666	0.0029852	0.00258994	DDX58/NFKB1/NFKBIA/IFIH1/TRIM25	5
R-HSA-877312	Regulation of IFNG signaling	4/229	14/10654	0.000175679	0.00378338	0.00328243	IFNG/STAT1/SOCS1/SOCS3	4
R-HSA-500792	GPCR ligand binding	23/229	468/10654	0.000182316	0.00379092	0.00328897	ADORA2A/EDN1/FPR1/FPR3/FFAR2/CXCL1/CXCL2/CXCL8/CXCL10/CCL4L1/CCL3L3/CXCL9/PTGER2/CCL2/CCL3/CCL3L1/CCL7/CCL20/CXCL11/CXCL5/C5AR1/CCR2/CCRL2	23
R-HSA-166058	MyD88:MAL(TIRAP) cascade initiated on plasma membrane	9/229	95/10654	0.000197595	0.00384355	0.00333463	MAP3K8/FOS/IRAK2/NFKB1/NFKBIA/RPS6KA1/MAPKAPK3/SOCS1/RIPK2	9
R-HSA-168188	Toll Like Receptor TLR6:TLR2 Cascade	9/229	95/10654	0.000197595	0.00384355	0.00333463	MAP3K8/FOS/IRAK2/NFKB1/NFKBIA/RPS6KA1/MAPKAPK3/SOCS1/RIPK2	9
R-HSA-446652	Interleukin-1 family signaling	11/229	140/10654	0.000211658	0.00398843	0.00346033	MAP3K8/IL1A/IL1B/IL1RN/IRAK2/NFKB1/NFKBIA/IL36G/PSMB8/RIPK2/IL18RAP	11
R-HSA-73887	Death Receptor Signalling	11/229	141/10654	0.000225299	0.00411683	0.00357173	RBCK1/BIRC3/FAS/NFKB1/NFKBIA/TNF/TRAF1/NSMAF/TNFSF10/RIPK2/CFLAR	11
R-HSA-168179	Toll Like Receptor TLR1:TLR2 Cascade	9/229	98/10654	0.000250313	0.00431253	0.00374151	MAP3K8/FOS/IRAK2/NFKB1/NFKBIA/RPS6KA1/MAPKAPK3/SOCS1/RIPK2	9
R-HSA-181438	Toll Like Receptor 2 (TLR2) Cascade	9/229	98/10654	0.000250313	0.00431253	0.00374151	MAP3K8/FOS/IRAK2/NFKB1/NFKBIA/RPS6KA1/MAPKAPK3/SOCS1/RIPK2	9
R-HSA-933541	TRAF6 mediated IRF7 activation	5/229	29/10654	0.000342143	0.00573089	0.00497208	DDX58/IFNB1/IRF7/IFIH1/TRIM25	5
R-HSA-9020702	Interleukin-1 signaling	9/229	103/10654	0.000363862	0.00592997	0.00514479	MAP3K8/IL1A/IL1B/IL1RN/IRAK2/NFKB1/NFKBIA/PSMB8/RIPK2	9
R-HSA-1834949	Cytosolic sensors of pathogen-associated DNA	7/229	63/10654	0.000384512	0.00598512	0.00519264	TICAM1/IFI16/IRF7/NFKB1/NFKBIA/TRIM21/ZBP1	7
R-HSA-140534	Caspase activation via Death Receptors in the presence of ligand	4/229	17/10654	0.000397023	0.00598512	0.00519264	TICAM1/FAS/TNFSF10/CFLAR	4
R-HSA-1810476	RIP-mediated NFkB activation via ZBP1	4/229	17/10654	0.000397023	0.00598512	0.00519264	TICAM1/NFKB1/NFKBIA/ZBP1	4
R-HSA-450294	MAP kinase activation	7/229	64/10654	0.000423963	0.00623536	0.00540975	MAP3K8/FOS/IRAK2/NFKB1/RPS6KA1/MAPKAPK3/RIPK2	7
R-HSA-168142	Toll Like Receptor 10 (TLR10) Cascade	8/229	85/10654	0.000467393	0.00633423	0.00549552	MAP3K8/FOS/IRAK2/NFKB1/NFKBIA/RPS6KA1/MAPKAPK3/RIPK2	8
R-HSA-168176	Toll Like Receptor 5 (TLR5) Cascade	8/229	85/10654	0.000467393	0.00633423	0.00549552	MAP3K8/FOS/IRAK2/NFKB1/NFKBIA/RPS6KA1/MAPKAPK3/RIPK2	8
R-HSA-975871	MyD88 cascade initiated on plasma membrane	8/229	85/10654	0.000467393	0.00633423	0.00549552	MAP3K8/FOS/IRAK2/NFKB1/NFKBIA/RPS6KA1/MAPKAPK3/RIPK2	8
R-HSA-196807	Nicotinate metabolism	5/229	31/10654	0.000472703	0.00633423	0.00549552	PARP14/PTGS2/PARP9/PARP10/CD38	5
R-HSA-5675482	Regulation of necroptotic cell death	4/229	18/10654	0.000501904	0.00657931	0.00570815	BIRC3/FAS/TNFSF10/CFLAR	4
R-HSA-197264	Nicotinamide salvaging	4/229	19/10654	0.000625099	0.00801989	0.00695799	PARP14/PTGS2/PARP9/PARP10	4
R-HSA-448424	Interleukin-17 signaling	7/229	72/10654	0.000869573	0.010924	0.00947758	MAP3K8/FOS/IRAK2/NFKB1/RPS6KA1/MAPKAPK3/RIPK2	7
R-HSA-1606322	ZBP1(DAI) mediated induction of type I IFNs	4/229	21/10654	0.000933203	0.0114841	0.00996352	TICAM1/NFKB1/NFKBIA/ZBP1	4
R-HSA-2559583	Cellular Senescence	12/229	195/10654	0.0010232	0.0123398	0.0107059	ETS2/FOS/IFNB1/IL1A/IL6/CXCL8/MOV10/NBN/NFKB1/RPS6KA1/TXN/MAPKAPK3	12
R-HSA-168643	Nucleotide-binding domain, leucine rich repeat containing receptor (NLR) signaling pathways	6/229	55/10654	0.00111083	0.0131339	0.0113949	NLRP3/BIRC3/IRAK2/NFKB1/TXN/RIPK2	6
R-HSA-5689896	Ovarian tumor domain proteases	5/229	38/10654	0.00123589	0.0143316	0.012434	DDX58/IFIH1/TRIM25/TNIP3/RIPK2	5
R-HSA-1059683	Interleukin-6 signaling	3/229	11/10654	0.0014234	0.015327	0.0132976	IL6/STAT1/SOCS3	3
R-HSA-3371378	Regulation by c-FLIP	3/229	11/10654	0.0014234	0.015327	0.0132976	FAS/TNFSF10/CFLAR	3
R-HSA-5218900	CASP8 activity is inhibited	3/229	11/10654	0.0014234	0.015327	0.0132976	FAS/TNFSF10/CFLAR	3
R-HSA-69416	Dimerization of procaspase-8	3/229	11/10654	0.0014234	0.015327	0.0132976	FAS/TNFSF10/CFLAR	3
R-HSA-6783589	Interleukin-6 family signaling	4/229	24/10654	0.00157522	0.0163768	0.0142084	CLCF1/IL6/STAT1/SOCS3	4
R-HSA-982772	Growth hormone receptor signaling	4/229	24/10654	0.00157522	0.0163768	0.0142084	STAT1/SOCS1/SOCS2/SOCS3	4
R-HSA-933543	NF-kB activation through FADD/RIP-1 pathway mediated by caspase-8 and -10	3/229	12/10654	0.00186791	0.0190907	0.0165629	DDX58/IFIH1/TRIM25	3
R-HSA-75893	TNF signaling	5/229	43/10654	0.00217271	0.0218357	0.0189445	RBCK1/BIRC3/TNF/TRAF1/NSMAF	5
R-HSA-5357769	Caspase activation via extrinsic apoptotic signalling pathway	4/229	27/10654	0.00247373	0.0244535	0.0212156	TICAM1/FAS/TNFSF10/CFLAR	4
R-HSA-418594	G alpha (i) signalling events	18/229	406/10654	0.00290467	0.0282503	0.0245097	DHRS9/RGS19/FPR1/FPR3/CXCL1/CXCL2/CXCL8/CXCL10/CCL4L1/LDLR/CXCL9/RGS1/CCL20/CXCL11/CXCL5/C5AR1/CCR2/CCL4L2	18
R-HSA-5357956	TNFR1-induced NFkappaB signaling pathway	4/229	30/10654	0.00367332	0.0347054	0.0301101	RBCK1/BIRC3/TNF/TRAF1	4
R-HSA-844456	The NLRP3 inflammasome	3/229	15/10654	0.00368349	0.0347054	0.0301101	NLRP3/NFKB1/TXN	3
R-HSA-193639	p75NTR signals via NF-kB	3/229	16/10654	0.00446227	0.0413962	0.035915	NFKB1/NFKBIA/RIPK2	3
R-HSA-8953897	Cellular responses to external stimuli	20/229	493/10654	0.00474243	0.0433286	0.0375915	ETS2/FOS/DNAJA1/HSPA1A/HSPA1B/IFNB1/IL1A/IL6/CXCL8/MOV10/MT1A/MT2A/NBN/NFKB1/PSMB8/FNIP2/RPS6KA1/NCF1/TXN/MAPKAPK3	20
R-HSA-445989	TAK1 activates NFkB by phosphorylation and activation of IKKs complex	4/229	33/10654	0.00521633	0.0462565	0.0401318	IRAK2/NFKB1/NFKBIA/RIPK2	4
R-HSA-5357905	Regulation of TNFR1 signaling	4/229	33/10654	0.00521633	0.0462565	0.0401318	RBCK1/BIRC3/TNF/TRAF1	4
R-HSA-5676594	TNF receptor superfamily (TNFSF) members mediating non-canonical NF-kB pathway	3/229	18/10654	0.0062997	0.0550539	0.0477643	BIRC3/LTA/CD40	3
R-HSA-622312	Inflammasomes	3/229	20/10654	0.00852758	0.073459	0.0637324	NLRP3/NFKB1/TXN	3
R-HSA-381340	Transcriptional regulation of white adipocyte differentiation	6/229	84/10654	0.00931857	0.0791423	0.0686632	CEBPD/ZNF467/NFKB1/RXRA/TNF/HELZ2	6
R-HSA-983169	Class I MHC mediated antigen processing & presentation	15/229	371/10654	0.0141124	0.114304	0.099169	RBCK1/RNF19B/CTSL/RNF144B/FBXO6/HERC5/HERC6/PSMB8/RNF213/NCF1/TRIM21/TAP1/SOCS1/SOCS3/UBE2L6	15
R-HSA-450302	activated TAK1 mediates p38 MAPK activation	3/229	24/10654	0.0142169	0.114304	0.099169	IRAK2/MAPKAPK3/RIPK2	3
R-HSA-5260271	Diseases of Immune System	3/229	24/10654	0.0142169	0.114304	0.099169	TICAM1/NFKB1/NFKBIA	3
R-HSA-5602358	Diseases associated with the TLR signaling cascade	3/229	24/10654	0.0142169	0.114304	0.099169	TICAM1/NFKB1/NFKBIA	3
R-HSA-2262752	Cellular responses to stress	18/229	479/10654	0.0151216	0.119978	0.104092	ETS2/FOS/DNAJA1/HSPA1A/HSPA1B/IFNB1/IL1A/IL6/CXCL8/MOV10/NBN/NFKB1/PSMB8/FNIP2/RPS6KA1/NCF1/TXN/MAPKAPK3	18
R-HSA-8854691	Interleukin-20 family signaling	3/229	25/10654	0.0159041	0.124548	0.108057	IL19/STAT1/STAT2	3
R-HSA-5357801	Programmed Cell Death	9/229	181/10654	0.0162219	0.125408	0.108803	TICAM1/MLKL/BIRC3/FAS/PMAIP1/PSMB8/TP53BP2/TNFSF10/CFLAR	9
R-HSA-8877330	RUNX1 and FOXP3 control the development of regulatory T lymphocytes (Tregs)	2/229	10/10654	0.0184752	0.14102	0.122347	IFNG/IL2RA	2
R-HSA-1368108	BMAL1:CLOCK,NPAS2 activates circadian gene expression	3/229	27/10654	0.0196022	0.145927	0.126605	RXRA/HELZ2/BHLHE40	3
R-HSA-380994	ATF4 activates genes in response to endoplasmic reticulum stress	3/229	27/10654	0.0196022	0.145927	0.126605	CXCL8/ATF3/CCL2	3
R-HSA-196854	Metabolism of vitamins and cofactors	9/229	189/10654	0.0208779	0.153529	0.1332	PDSS1/GCH1/LDLR/PARP14/PTGS2/PARP9/PARP10/VNN2/CD38	9
R-HSA-5661231	Metallothioneins bind metals	2/229	11/10654	0.0222645	0.159721	0.138573	MT1A/MT2A	2
R-HSA-75072	mRNA Editing	2/229	11/10654	0.0222645	0.159721	0.138573	ADAR/APOBEC3A	2
R-HSA-5668541	TNFR2 non-canonical NF-kB pathway	6/229	102/10654	0.0225146	0.159721	0.138573	BIRC3/LTA/PSMB8/TNF/TNFRSF4/CD40	6
R-HSA-6803211	TP53 Regulates Transcription of Death Receptors and Ligands	2/229	12/10654	0.0263438	0.180515	0.156613	FAS/TP53BP2	2
R-HSA-9013973	TICAM1-dependent activation of IRF3/IRF7	2/229	12/10654	0.0263438	0.180515	0.156613	TICAM1/IRF7	2
R-HSA-9634600	Regulation of glycolysis by fructose 2,6-bisphosphate metabolism	2/229	12/10654	0.0263438	0.180515	0.156613	PFKFB3/PFKFB4	2
R-HSA-1679131	Trafficking and processing of endosomal TLR	2/229	13/10654	0.0306991	0.199354	0.172958	CTSL/TLR7	2
R-HSA-209560	NF-kB is activated and signals survival	2/229	13/10654	0.0306991	0.199354	0.172958	NFKB1/NFKBIA	2
R-HSA-75205	Dissolution of Fibrin Clot	2/229	13/10654	0.0306991	0.199354	0.172958	SERPINB2/PLAUR	2
R-HSA-381042	PERK regulates gene expression	3/229	32/10654	0.0307461	0.199354	0.172958	CXCL8/ATF3/CCL2	3
R-HSA-5656169	Termination of translesion DNA synthesis	3/229	32/10654	0.0307461	0.199354	0.172958	TRIM25/UBE2L6/ISG15	3
R-HSA-2559582	Senescence-Associated Secretory Phenotype (SASP)	6/229	110/10654	0.0311521	0.199837	0.173377	FOS/IL1A/IL6/CXCL8/NFKB1/RPS6KA1	6
R-HSA-447115	Interleukin-12 family signaling	4/229	57/10654	0.0338408	0.2148	0.186359	IFNG/IL12B/SERPINB2/STAT1	4
R-HSA-983168	Antigen processing: Ubiquitination & Proteasome degradation	12/229	309/10654	0.0348322	0.217305	0.188532	RBCK1/RNF19B/RNF144B/FBXO6/HERC5/HERC6/PSMB8/RNF213/TRIM21/SOCS1/SOCS3/UBE2L6	12
R-HSA-3371568	Attenuation phase	2/229	14/10654	0.0353166	0.217305	0.188532	HSPA1A/HSPA1B	2
R-HSA-5660526	Response to metal ions	2/229	14/10654	0.0353166	0.217305	0.188532	MT1A/MT2A	2
R-HSA-3134975	Regulation of innate immune responses to cytosolic DNA	2/229	15/10654	0.0401832	0.242305	0.210222	TRIM21/ZBP1	2
R-HSA-975110	TRAF6 mediated IRF7 activation in TLR7/8 or 9 signaling	2/229	15/10654	0.0401832	0.242305	0.210222	IRF7/TLR7	2
R-HSA-168638	NOD1/2 Signaling Pathway	3/229	36/10654	0.0415961	0.248341	0.215459	BIRC3/IRAK2/RIPK2	3
R-HSA-202403	TCR signaling	6/229	119/10654	0.0431735	0.255232	0.221437	ITK/NFKB1/NFKBIA/PSMB8/WAS/RIPK2	6
R-HSA-1834941	STING mediated induction of host immune responses	2/229	16/10654	0.0452862	0.260072	0.225637	IFI16/TRIM21	2
R-HSA-5684264	MAP3K8 (TPL2)-dependent MAPK1/3 activation	2/229	16/10654	0.0452862	0.260072	0.225637	MAP3K8/NFKB1	2
R-HSA-975163	IRAK2 mediated activation of TAK1 complex upon TLR7/8 or 9 stimulation	2/229	16/10654	0.0452862	0.260072	0.225637	TICAM1/IRAK2	2
R-HSA-196849	Metabolism of water-soluble vitamins and cofactors	6/229	123/10654	0.0493355	0.278641	0.241747	PARP14/PTGS2/PARP9/PARP10/VNN2/CD38	6
R-HSA-8934593	Regulation of RUNX1 Expression and Activity	2/229	17/10654	0.0506132	0.278641	0.241747	MOV10/PML	2
R-HSA-9018677	Biosynthesis of DHA-derived SPMs	2/229	17/10654	0.0506132	0.278641	0.241747	LTA4H/PTGS2	2
R-HSA-937072	TRAF6-mediated induction of TAK1 complex within TLR4 complex	2/229	17/10654	0.0506132	0.278641	0.241747	TICAM1/IRAK2	2
R-HSA-110313	Translesion synthesis by Y family DNA polymerases bypasses lesions on DNA template	3/229	39/10654	0.0508301	0.278641	0.241747	TRIM25/UBE2L6/ISG15	3
R-HSA-6798695	Neutrophil degranulation	16/229	480/10654	0.0543409	0.295203	0.256116	STOM/FPR1/FUCA1/GLA/CXCL1/HSPA1A/HSPA1B/TBC1D10C/LTA4H/NFKB1/PECAM1/PLAUR/BST2/TNFAIP6/C5AR1/TYROBP	16
R-HSA-5688426	Deubiquitination	11/229	297/10654	0.0558817	0.297017	0.257689	USP18/NLRP3/DDX58/BIRC3/MYC/NFKBIA/PSMB8/IFIH1/TRIM25/TNIP3/RIPK2	11
R-HSA-1368082	RORA activates gene expression	2/229	18/10654	0.0561524	0.297017	0.257689	RXRA/HELZ2	2
R-HSA-936964	Activation of IRF3/IRF7 mediated by TBK1/IKK epsilon	2/229	18/10654	0.0561524	0.297017	0.257689	TICAM1/IRF7	2
R-HSA-9018678	Biosynthesis of specialized proresolving mediators (SPMs)	2/229	19/10654	0.0618923	0.324531	0.28156	LTA4H/PTGS2	2
R-HSA-168927	TICAM1, RIP1-mediated IKK complex recruitment	2/229	20/10654	0.0678217	0.342757	0.297373	TICAM1/BIRC3	2
R-HSA-6803204	TP53 Regulates Transcription of Genes Involved in Cytochrome C Release	2/229	20/10654	0.0678217	0.342757	0.297373	PMAIP1/TP53BP2	2
R-HSA-8978934	Metabolism of cofactors	2/229	20/10654	0.0678217	0.342757	0.297373	PDSS1/GCH1	2
R-HSA-451927	Interleukin-2 family signaling	3/229	44/10654	0.0682103	0.342757	0.297373	CSF2/IL2RA/STAT1	3
R-HSA-5633008	TP53 Regulates Transcription of Cell Death Genes	3/229	44/10654	0.0682103	0.342757	0.297373	FAS/PMAIP1/TP53BP2	3
R-HSA-8878171	Transcriptional regulation by RUNX1	9/229	239/10654	0.0729366	0.363477	0.31535	CSF2/CTSL/IFNG/IL2RA/MOV10/PML/PSMB8/SPI1/SOCS3	9
R-HSA-2142691	Synthesis of Leukotrienes (LT) and Eoxins (EX)	2/229	21/10654	0.07393	0.365408	0.317025	CYP4B1/LTA4H	2
R-HSA-9020591	Interleukin-12 signaling	3/229	47/10654	0.0797649	0.390037	0.338393	IFNG/IL12B/SERPINB2	3
R-HSA-389357	CD28 dependent PI3K/Akt signaling	2/229	22/10654	0.0802067	0.390037	0.338393	MAP3K8/CD86	2
R-HSA-73893	DNA Damage Bypass	3/229	48/10654	0.0837938	0.404221	0.350699	TRIM25/UBE2L6/ISG15	3
R-HSA-112409	RAF-independent MAPK1/3 activation	2/229	23/10654	0.0866419	0.411379	0.356909	DUSP5/IL6	2
R-HSA-450321	JNK (c-Jun kinases) phosphorylation and activation mediated by activated human TAK1	2/229	23/10654	0.0866419	0.411379	0.356909	IRAK2/RIPK2	2
R-HSA-109581	Apoptosis	7/229	178/10654	0.0893504	0.420924	0.36519	TICAM1/FAS/PMAIP1/PSMB8/TP53BP2/TNFSF10/CFLAR	7
R-HSA-3371571	HSF1-dependent transactivation	2/229	24/10654	0.093226	0.433857	0.376411	HSPA1A/HSPA1B	2
R-HSA-983705	Signaling by the B Cell Receptor (BCR)	5/229	112/10654	0.0935347	0.433857	0.376411	PIK3AP1/RASGRP3/NFKB1/NFKBIA/PSMB8	5
R-HSA-937041	IKK complex recruitment mediated by RIP1	2/229	25/10654	0.0999497	0.460074	0.399156	TICAM1/BIRC3	2
R-HSA-1168372	Downstream signaling events of B Cell Receptor (BCR)	4/229	83/10654	0.103274	0.471775	0.409308	RASGRP3/NFKB1/NFKBIA/PSMB8	4
R-HSA-975576	N-glycan antennae elongation in the medial/trans-Golgi	2/229	26/10654	0.106804	0.483782	0.419725	FUCA1/B4GALT5	2
R-HSA-1989781	PPARA activates gene expression	5/229	117/10654	0.107507	0.483782	0.419725	ACSL1/RGL1/G0S2/RXRA/HELZ2	5
R-HSA-400206	Regulation of lipid metabolism by Peroxisome proliferator-activated receptor alpha (PPARalpha)	5/229	119/10654	0.113368	0.503011	0.436409	ACSL1/RGL1/G0S2/RXRA/HELZ2	5
R-HSA-912526	Interleukin receptor SHC signaling	2/229	27/10654	0.11378	0.503011	0.436409	CSF2/IL2RA	2
R-HSA-3371497	HSP90 chaperone cycle for steroid hormone receptors (SHR)	3/229	55/10654	0.114283	0.503011	0.436409	DNAJA1/HSPA1A/HSPA1B	3
R-HSA-450408	AUF1 (hnRNP D0) binds and destabilizes mRNA	3/229	56/10654	0.118941	0.519721	0.450906	HSPA1A/HSPA1B/PSMB8	3
R-HSA-3295583	TRP channels	2/229	28/10654	0.12087	0.524349	0.454921	MLKL/MCOLN2	2
R-HSA-5669034	TNFs bind their physiological receptors	2/229	29/10654	0.128065	0.549166	0.476452	LTA/TNFRSF4	2
R-HSA-9616222	Transcriptional regulation of granulopoiesis	4/229	90/10654	0.128412	0.549166	0.476452	MYC/PML/RXRA/SPI1	4
R-HSA-2559580	Oxidative Stress Induced Senescence	5/229	125/10654	0.131841	0.559859	0.485729	FOS/IFNB1/MOV10/TXN/MAPKAPK3	5
R-HSA-2142753	Arachidonic acid metabolism	3/229	59/10654	0.133325	0.562201	0.487761	CYP4B1/LTA4H/PTGS2	3
R-HSA-114452	Activation of BH3-only proteins	2/229	30/10654	0.135358	0.566811	0.491761	PMAIP1/TP53BP2	2
R-HSA-450282	MAPK targets/ Nuclear events mediated by MAP kinases	2/229	31/10654	0.142741	0.589541	0.511481	FOS/RPS6KA1	2
R-HSA-70268	Pyruvate metabolism	2/229	31/10654	0.142741	0.589541	0.511481	RXRA/SLC16A3	2
R-HSA-168274	Export of Viral Ribonucleoproteins from Nucleus	2/229	33/10654	0.15775	0.634155	0.550188	HSPA1A/HSPA1B	2
R-HSA-202433	Generation of second messenger molecules	2/229	33/10654	0.15775	0.634155	0.550188	ITK/WAS	2
R-HSA-2559585	Oncogene Induced Senescence	2/229	33/10654	0.15775	0.634155	0.550188	ETS2/MOV10	2
R-HSA-389356	CD28 co-stimulation	2/229	33/10654	0.15775	0.634155	0.550188	MAP3K8/CD86	2
R-HSA-202424	Downstream TCR signaling	4/229	98/10654	0.159912	0.638587	0.554033	NFKB1/NFKBIA/PSMB8/RIPK2	4
R-HSA-2454202	Fc epsilon receptor (FCERI) signaling	5/229	134/10654	0.161886	0.642219	0.557184	FOS/ITK/NFKB1/NFKBIA/PSMB8	5
R-HSA-1236975	Antigen processing-Cross presentation	4/229	99/10654	0.164035	0.646491	0.560891	CTSL/PSMB8/NCF1/TAP1	4
R-HSA-5607764	CLEC7A (Dectin-1) signaling	4/229	101/10654	0.172396	0.675031	0.585651	IL1B/NFKB1/NFKBIA/PSMB8	4
R-HSA-1169091	Activation of NF-kappaB in B cells	3/229	67/10654	0.174309	0.678118	0.58833	NFKB1/NFKBIA/PSMB8	3
R-HSA-1266695	Interleukin-7 signaling	2/229	36/10654	0.180769	0.680556	0.590445	SOCS1/SOCS2	2
R-HSA-6811558	PI5P, PP2A and IER3 Regulate PI3K/AKT Signaling	4/229	103/10654	0.180902	0.680556	0.590445	PIK3AP1/ICOS/IER3/CD86	4
R-HSA-5683057	MAPK family signaling cascades	9/229	294/10654	0.182601	0.680556	0.590445	CSF2/DUSP5/RASGRP3/IL2RA/IL6/MOV10/MYC/PSMB8/RAPGEF2	9
R-HSA-3299685	Detoxification of Reactive Oxygen Species	2/229	37/10654	0.188551	0.680556	0.590445	NCF1/TXN	2
R-HSA-9029569	NR1H3 & NR1H2 regulate gene expression linked to cholesterol transport and efflux	2/229	37/10654	0.188551	0.680556	0.590445	MOV10/RXRA	2
R-HSA-388841	Costimulation by the CD28 family	3/229	70/10654	0.190503	0.680556	0.590445	MAP3K8/ICOS/CD86	3
R-HSA-400253	Circadian Clock	3/229	70/10654	0.190503	0.680556	0.590445	RXRA/HELZ2/BHLHE40	3
R-HSA-110056	MAPK3 (ERK1) activation	1/229	10/10654	0.195375	0.680556	0.590445	IL6	1
R-HSA-2562578	TRIF-mediated programmed cell death	1/229	10/10654	0.195375	0.680556	0.590445	TICAM1	1
R-HSA-399997	Acetylcholine regulates insulin secretion	1/229	10/10654	0.195375	0.680556	0.590445	MARCKS	1
R-HSA-442380	Zinc influx into cells by the SLC39 gene family	1/229	10/10654	0.195375	0.680556	0.590445	SLC39A8	1
R-HSA-450341	Activation of the AP-1 family of transcription factors	1/229	10/10654	0.195375	0.680556	0.590445	FOS	1
R-HSA-5685939	HDR through MMEJ (alt-NHEJ)	1/229	10/10654	0.195375	0.680556	0.590445	NBN	1
R-HSA-9020958	Interleukin-21 signaling	1/229	10/10654	0.195375	0.680556	0.590445	STAT1	1
R-HSA-937042	IRAK2 mediated activation of TAK1 complex	1/229	10/10654	0.195375	0.680556	0.590445	IRAK2	1
R-HSA-9617629	Regulation of FOXO transcriptional activity by acetylation	1/229	10/10654	0.195375	0.680556	0.590445	TXN	1
R-HSA-975578	Reactions specific to the complex N-glycan synthesis pathway	1/229	10/10654	0.195375	0.680556	0.590445	FUCA1	1
R-HSA-5689880	Ub-specific processing proteases	7/229	220/10654	0.195542	0.680556	0.590445	USP18/DDX58/BIRC3/MYC/NFKBIA/PSMB8/IFIH1	7
R-HSA-8950505	Gene and protein expression by JAK-STAT signaling after Interleukin-12 stimulation	2/229	38/10654	0.196379	0.680556	0.590445	IFNG/SERPINB2	2
R-HSA-2672351	Stimuli-sensing channels	4/229	109/10654	0.207212	0.689515	0.598218	TSC22D3/MLKL/STOM/MCOLN2	4
R-HSA-199418	Negative regulation of the PI3K/AKT network	4/229	110/10654	0.211702	0.689515	0.598218	PIK3AP1/ICOS/IER3/CD86	4
R-HSA-168276	NS1 Mediated Effects on Host Pathways	2/229	40/10654	0.212149	0.689515	0.598218	EIF2AK2/ISG15	2
R-HSA-1236977	Endosomal/Vacuolar pathway	1/229	11/10654	0.212686	0.689515	0.598218	CTSL	1
R-HSA-193692	Regulated proteolysis of p75NTR	1/229	11/10654	0.212686	0.689515	0.598218	NFKB1	1
R-HSA-2022923	Dermatan sulfate biosynthesis	1/229	11/10654	0.212686	0.689515	0.598218	VCAN	1
R-HSA-2586552	Signaling by Leptin	1/229	11/10654	0.212686	0.689515	0.598218	SOCS3	1
R-HSA-446107	Type I hemidesmosome assembly	1/229	11/10654	0.212686	0.689515	0.598218	CD151	1
R-HSA-4755510	SUMOylation of immune response proteins	1/229	11/10654	0.212686	0.689515	0.598218	NFKBIA	1
R-HSA-8963691	Phenylalanine and tyrosine metabolism	1/229	11/10654	0.212686	0.689515	0.598218	IL4I1	1
R-HSA-9014325	TICAM1,TRAF6-dependent induction of TAK1 complex	1/229	11/10654	0.212686	0.689515	0.598218	TICAM1	1
R-HSA-9020956	Interleukin-27 signaling	1/229	11/10654	0.212686	0.689515	0.598218	STAT1	1
R-HSA-2219530	Constitutive Signaling by Aberrant PI3K in Cancer	3/229	75/10654	0.218275	0.695803	0.603673	PIK3AP1/ICOS/CD86	3
R-HSA-9018519	Estrogen-dependent gene expression	5/229	150/10654	0.221148	0.695803	0.603673	KANK1/FOS/MOV10/MYC/CXXC5	5
R-HSA-1461957	Beta defensins	2/229	42/10654	0.228035	0.695803	0.603673	DEFB1/CCR2	2
R-HSA-168253	Host Interactions with Influenza Factors	2/229	42/10654	0.228035	0.695803	0.603673	EIF2AK2/ISG15	2
R-HSA-2426168	Activation of gene expression by SREBF (SREBP)	2/229	42/10654	0.228035	0.695803	0.603673	RXRA/HELZ2	2
R-HSA-1474151	Tetrahydrobiopterin (BH4) synthesis, recycling, salvage and regulation	1/229	12/10654	0.229627	0.695803	0.603673	GCH1	1
R-HSA-210990	PECAM1 interactions	1/229	12/10654	0.229627	0.695803	0.603673	PECAM1	1
R-HSA-211958	Miscellaneous substrates	1/229	12/10654	0.229627	0.695803	0.603673	CYP4B1	1
R-HSA-211979	Eicosanoids	1/229	12/10654	0.229627	0.695803	0.603673	CYP4B1	1
R-HSA-389359	CD28 dependent Vav1 pathway	1/229	12/10654	0.229627	0.695803	0.603673	CD86	1
R-HSA-73621	Pyrimidine catabolism	1/229	12/10654	0.229627	0.695803	0.603673	NT5C3A	1
R-HSA-8984722	Interleukin-35 Signalling	1/229	12/10654	0.229627	0.695803	0.603673	STAT1	1
R-HSA-9020558	Interleukin-2 signaling	1/229	12/10654	0.229627	0.695803	0.603673	IL2RA	1
R-HSA-1433557	Signaling by SCF-KIT	2/229	43/10654	0.236011	0.708032	0.614283	STAT1/SOCS1	2
R-HSA-5362517	Signaling by Retinoic Acid	2/229	43/10654	0.236011	0.708032	0.614283	DHRS9/RXRA	2
R-HSA-171007	p38MAPK events	1/229	13/10654	0.246204	0.712101	0.617813	MAPKAPK3	1
R-HSA-2046104	alpha-linolenic (omega3) and linoleic (omega6) acid metabolism	1/229	13/10654	0.246204	0.712101	0.617813	ACSL1	1
R-HSA-2046106	alpha-linolenic acid (ALA) metabolism	1/229	13/10654	0.246204	0.712101	0.617813	ACSL1	1
R-HSA-209543	p75NTR recruits signalling complexes	1/229	13/10654	0.246204	0.712101	0.617813	RIPK2	1
R-HSA-3270619	IRF3-mediated induction of type I IFN	1/229	13/10654	0.246204	0.712101	0.617813	IFI16	1
R-HSA-432047	Passive transport by Aquaporins	1/229	13/10654	0.246204	0.712101	0.617813	AQP9	1
R-HSA-5357786	TNFR1-induced proapoptotic signaling	1/229	13/10654	0.246204	0.712101	0.617813	TNF	1
R-HSA-187037	Signaling by NTRK1 (TRKA)	3/229	80/10654	0.246815	0.712101	0.617813	ADORA2A/RPS6KA1/MAPKAPK3	3
R-HSA-2871837	FCERI mediated NF-kB activation	3/229	82/10654	0.258393	0.72923	0.632674	NFKB1/NFKBIA/PSMB8	3
R-HSA-1660662	Glycosphingolipid metabolism	2/229	46/10654	0.260011	0.72923	0.632674	NEU4/GLA	2
R-HSA-3700989	Transcriptional Regulation by TP53	10/229	365/10654	0.260311	0.72923	0.632674	FOS/RGCC/FAS/MOV10/NBN/PMAIP1/PML/TAF4B/TP53BP2/TXN	10
R-HSA-200425	Import of palmitoyl-CoA into the mitochondrial matrix	1/229	14/10654	0.262426	0.72923	0.632674	RXRA	1
R-HSA-2024101	CS/DS degradation	1/229	14/10654	0.262426	0.72923	0.632674	VCAN	1
R-HSA-6803205	TP53 regulates transcription of several additional cell death genes whose specific roles in p53-dependent apoptosis remain uncertain	1/229	14/10654	0.262426	0.72923	0.632674	TP53BP2	1
R-HSA-6804759	Regulation of TP53 Activity through Association with Co-factors	1/229	14/10654	0.262426	0.72923	0.632674	TP53BP2	1
R-HSA-71240	Tryptophan catabolism	1/229	14/10654	0.262426	0.72923	0.632674	IDO1	1
R-HSA-9024446	NR1H2 and NR1H3-mediated signaling	2/229	47/10654	0.268022	0.741363	0.6432	MOV10/RXRA	2
R-HSA-512988	Interleukin-3, Interleukin-5 and GM-CSF signaling	2/229	48/10654	0.276032	0.745845	0.647089	CSF2/IL2RA	2
R-HSA-193807	Synthesis of bile acids and bile salts via 27-hydroxycholesterol	1/229	15/10654	0.2783	0.745845	0.647089	RXRA	1
R-HSA-211935	Fatty acids	1/229	15/10654	0.2783	0.745845	0.647089	CYP4B1	1
R-HSA-2162123	Synthesis of Prostaglandins (PG) and Thromboxanes (TX)	1/229	15/10654	0.2783	0.745845	0.647089	PTGS2	1
R-HSA-391903	Eicosanoid ligand-binding receptors	1/229	15/10654	0.2783	0.745845	0.647089	PTGER2	1
R-HSA-71336	Pentose phosphate pathway	1/229	15/10654	0.2783	0.745845	0.647089	TKT	1
R-HSA-975577	N-Glycan antennae elongation	1/229	15/10654	0.2783	0.745845	0.647089	B4GALT5	1
R-HSA-450531	Regulation of mRNA stability by proteins that bind AU-rich elements	3/229	88/10654	0.293504	0.763717	0.662595	HSPA1A/HSPA1B/PSMB8	3
R-HSA-1433559	Regulation of KIT signaling	1/229	16/10654	0.293835	0.763717	0.662595	SOCS1	1
R-HSA-159418	Recycling of bile acids and salts	1/229	16/10654	0.293835	0.763717	0.662595	RXRA	1
R-HSA-1660516	Synthesis of PIPs at the early endosome membrane	1/229	16/10654	0.293835	0.763717	0.662595	PI4K2B	1
R-HSA-204174	Regulation of pyruvate dehydrogenase (PDH) complex	1/229	16/10654	0.293835	0.763717	0.662595	RXRA	1
R-HSA-391160	Signal regulatory protein family interactions	1/229	16/10654	0.293835	0.763717	0.662595	TYROBP	1
R-HSA-418038	Nucleotide-like (purinergic) receptors	1/229	16/10654	0.293835	0.763717	0.662595	ADORA2A	1
R-HSA-428157	Sphingolipid metabolism	3/229	89/10654	0.299394	0.771515	0.66936	NEU4/SGPP2/GLA	3
R-HSA-5687128	MAPK6/MAPK4 signaling	3/229	89/10654	0.299394	0.771515	0.66936	MOV10/MYC/PSMB8	3
R-HSA-1461973	Defensins	2/229	52/10654	0.307991	0.776466	0.673656	DEFB1/CCR2	2
R-HSA-199220	Vitamin B5 (pantothenate) metabolism	1/229	17/10654	0.309036	0.776466	0.673656	VNN2	1
R-HSA-432142	Platelet sensitization by LDL	1/229	17/10654	0.309036	0.776466	0.673656	PECAM1	1
R-HSA-435354	Zinc transporters	1/229	17/10654	0.309036	0.776466	0.673656	SLC39A8	1
R-HSA-6788467	IL-6-type cytokine receptor ligand interactions	1/229	17/10654	0.309036	0.776466	0.673656	CLCF1	1
R-HSA-5684996	MAPK1/MAPK3 signaling	7/229	255/10654	0.309041	0.776466	0.673656	CSF2/DUSP5/RASGRP3/IL2RA/IL6/PSMB8/RAPGEF2	7
R-HSA-70326	Glucose metabolism	3/229	91/10654	0.311191	0.778622	0.675526	SLC37A2/PFKFB3/PFKFB4	3
R-HSA-198933	Immunoregulatory interactions between a Lymphoid and a non-Lymphoid cell	4/229	132/10654	0.315691	0.784009	0.6802	SLAMF7/TYROBP/IFITM1/CD40	4
R-HSA-109606	Intrinsic Pathway for Apoptosis	2/229	53/10654	0.315944	0.784009	0.6802	PMAIP1/TP53BP2	2
R-HSA-163125	Post-translational modification: synthesis of GPI-anchored proteins	3/229	93/10654	0.323002	0.784175	0.680344	LY6E/PLAUR/VNN2	3
R-HSA-1660514	Synthesis of PIPs at the Golgi membrane	1/229	18/10654	0.323912	0.784175	0.680344	PI4K2B	1
R-HSA-1839117	Signaling by cytosolic FGFR1 fusion mutants	1/229	18/10654	0.323912	0.784175	0.680344	STAT1	1
R-HSA-1912420	Pre-NOTCH Processing in Golgi	1/229	18/10654	0.323912	0.784175	0.680344	LFNG	1
R-HSA-881907	Gastrin-CREB signalling pathway via PKC and MAPK	1/229	18/10654	0.323912	0.784175	0.680344	RPS6KA1	1
R-HSA-416476	G alpha (q) signalling events	6/229	217/10654	0.324059	0.784175	0.680344	RGS19/EDN1/FFAR2/RGS1/RGS2/RPS6KA1	6
R-HSA-381119	Unfolded Protein Response (UPR)	3/229	94/10654	0.328909	0.784175	0.680344	CXCL8/ATF3/CCL2	3
R-HSA-1655829	Regulation of cholesterol biosynthesis by SREBP (SREBF)	2/229	55/10654	0.331786	0.784175	0.680344	RXRA/HELZ2	2
R-HSA-71406	Pyruvate metabolism and Citric Acid (TCA) cycle	2/229	55/10654	0.331786	0.784175	0.680344	RXRA/SLC16A3	2
R-HSA-8978868	Fatty acid metabolism	5/229	177/10654	0.332242	0.784175	0.680344	CYP4B1/ACSL1/LTA4H/PTGS2/RXRA	5
R-HSA-1362277	Transcription of E2F targets under negative control by DREAM complex	1/229	19/10654	0.338468	0.784175	0.680344	MYC	1
R-HSA-190872	Transport of connexons to the plasma membrane	1/229	19/10654	0.338468	0.784175	0.680344	GJB2	1
R-HSA-416700	Other semaphorin interactions	1/229	19/10654	0.338468	0.784175	0.680344	TYROBP	1
R-HSA-5576886	Phase 4 - resting membrane potential	1/229	19/10654	0.338468	0.784175	0.680344	KCNJ2	1
R-HSA-70895	Branched-chain amino acid catabolism	1/229	19/10654	0.338468	0.784175	0.680344	PPM1K	1
R-HSA-8964038	LDL clearance	1/229	19/10654	0.338468	0.784175	0.680344	LDLR	1
R-HSA-2151201	Transcriptional activation of mitochondrial biogenesis	2/229	56/10654	0.339669	0.784175	0.680344	RXRA/HELZ2	2
R-HSA-1257604	PIP3 activates AKT signaling	7/229	264/10654	0.340285	0.784175	0.680344	PIK3AP1/ICOS/MOV10/PML/PSMB8/IER3/CD86	7
R-HSA-8878159	Transcriptional regulation by RUNX3	3/229	96/10654	0.340719	0.784175	0.680344	MYC/PSMB8/SPP1	3
R-HSA-193704	p75 NTR receptor-mediated signalling	3/229	97/10654	0.34662	0.790653	0.685964	NFKB1/NFKBIA/RIPK2	3
R-HSA-6803157	Antimicrobial peptides	3/229	97/10654	0.34662	0.790653	0.685964	DEFB1/PI3/CCR2	3
R-HSA-167044	Signalling to RAS	1/229	20/10654	0.352713	0.790653	0.685964	MAPKAPK3	1
R-HSA-2022870	Chondroitin sulfate biosynthesis	1/229	20/10654	0.352713	0.790653	0.685964	VCAN	1
R-HSA-3560783	Defective B4GALT7 causes EDS, progeroid type	1/229	20/10654	0.352713	0.790653	0.685964	VCAN	1
R-HSA-3560801	Defective B3GAT3 causes JDSSDHD	1/229	20/10654	0.352713	0.790653	0.685964	VCAN	1
R-HSA-4420332	Defective B3GALT6 causes EDSP2 and SEMDJL1	1/229	20/10654	0.352713	0.790653	0.685964	VCAN	1
R-HSA-186797	Signaling by PDGF	2/229	58/10654	0.355347	0.793608	0.688528	SPP1/STAT1	2
R-HSA-351202	Metabolism of polyamines	2/229	59/10654	0.363137	0.803967	0.697516	PSMB8/SAT1	2
R-HSA-5621481	C-type lectin receptors (CLRs)	4/229	142/10654	0.364621	0.803967	0.697516	IL1B/NFKB1/NFKBIA/PSMB8	4
R-HSA-389513	CTLA4 inhibitory signaling	1/229	21/10654	0.366652	0.803967	0.697516	CD86	1
R-HSA-5621575	CD209 (DC-SIGN) signaling	1/229	21/10654	0.366652	0.803967	0.697516	NFKB1	1
R-HSA-6804115	TP53 regulates transcription of additional cell cycle genes whose exact role in the p53 pathway remain uncertain	1/229	21/10654	0.366652	0.803967	0.697516	RGCC	1
R-HSA-166520	Signaling by NTRKs	3/229	101/10654	0.370163	0.805807	0.699112	ADORA2A/RPS6KA1/MAPKAPK3	3
R-HSA-2219528	PI3K/AKT Signaling in Cancer	3/229	101/10654	0.370163	0.805807	0.699112	PIK3AP1/ICOS/CD86	3
R-HSA-2022090	Assembly of collagen fibrils and other multimeric structures	2/229	61/10654	0.378609	0.818986	0.710546	CTSL/CD151	2
R-HSA-198753	ERK/MAPK targets	1/229	22/10654	0.380292	0.818986	0.710546	RPS6KA1	1
R-HSA-5365859	RA biosynthesis pathway	1/229	22/10654	0.380292	0.818986	0.710546	DHRS9	1
R-HSA-8951664	Neddylation	6/229	234/10654	0.389303	0.835408	0.724793	DCUN1D3/FBXO6/NUB1/PSMB8/SOCS2/SOCS3	6
R-HSA-2453902	The canonical retinoid cycle in rods (twilight vision)	1/229	23/10654	0.39364	0.841719	0.730269	DHRS9	1
R-HSA-193368	Synthesis of bile acids and bile salts via 7alpha-hydroxycholesterol	1/229	24/10654	0.406701	0.854498	0.741355	RXRA	1
R-HSA-449836	Other interleukin signaling	1/229	24/10654	0.406701	0.854498	0.741355	CSF1R	1
R-HSA-5668599	RHO GTPases Activate NADPH Oxidases	1/229	24/10654	0.406701	0.854498	0.741355	NCF1	1
R-HSA-75876	Synthesis of very long-chain fatty acyl-CoAs	1/229	24/10654	0.406701	0.854498	0.741355	ACSL1	1
R-HSA-9634638	Estrogen-dependent nuclear events downstream of ESR-membrane signaling	1/229	24/10654	0.406701	0.854498	0.741355	FOS	1
R-HSA-8957275	Post-translational protein phosphorylation	3/229	108/10654	0.41095	0.854554	0.741404	VCAN/IL6/SPP1	3
R-HSA-211897	Cytochrome P450 - arranged by substrate type	2/229	66/10654	0.416567	0.854554	0.741404	CYP4B1/RXRA	2
R-HSA-1296041	Activation of G protein gated Potassium channels	1/229	25/10654	0.419483	0.854554	0.741404	KCNJ2	1
R-HSA-1296059	G protein gated Potassium channels	1/229	25/10654	0.419483	0.854554	0.741404	KCNJ2	1
R-HSA-198725	Nuclear Events (kinase and transcription factor activation)	1/229	25/10654	0.419483	0.854554	0.741404	RPS6KA1	1
R-HSA-210991	Basigin interactions	1/229	25/10654	0.419483	0.854554	0.741404	SLC16A3	1
R-HSA-9013508	NOTCH3 Intracellular Domain Regulates Transcription	1/229	25/10654	0.419483	0.854554	0.741404	STAT1	1
R-HSA-983170	Antigen Presentation: Folding, assembly and peptide loading of class I MHC	1/229	25/10654	0.419483	0.854554	0.741404	TAP1	1
R-HSA-997272	Inhibition of voltage gated Ca2+ channels via Gbeta/gamma subunits	1/229	25/10654	0.419483	0.854554	0.741404	KCNJ2	1
R-HSA-168254	Influenza Infection	4/229	155/10654	0.427929	0.865415	0.750827	HSPA1A/HSPA1B/EIF2AK2/ISG15	4
R-HSA-1971475	A tetrasaccharide linker sequence is required for GAG synthesis	1/229	26/10654	0.43199	0.865415	0.750827	VCAN	1
R-HSA-2173788	Downregulation of TGF-beta receptor signaling	1/229	26/10654	0.43199	0.865415	0.750827	PPP1R15A	1
R-HSA-425410	Metal ion SLC transporters	1/229	26/10654	0.43199	0.865415	0.750827	SLC39A8	1
R-HSA-5693554	Resolution of D-loop Structures through Synthesis-Dependent Strand Annealing (SDSA)	1/229	26/10654	0.43199	0.865415	0.750827	NBN	1
R-HSA-3371453	Regulation of HSF1-mediated heat shock response	2/229	69/10654	0.43878	0.876107	0.760103	HSPA1A/HSPA1B	2
R-HSA-1538133	G0 and Early G1	1/229	27/10654	0.444229	0.881151	0.764479	MYC	1
R-HSA-211976	Endogenous sterols	1/229	27/10654	0.444229	0.881151	0.764479	RXRA	1
R-HSA-5673001	RAF/MAP kinase cascade	6/229	249/10654	0.446914	0.88357	0.766578	CSF2/DUSP5/RASGRP3/IL2RA/PSMB8/RAPGEF2	6
R-HSA-5633007	Regulation of TP53 Activity	4/229	160/10654	0.451897	0.890419	0.772521	NBN/PML/TAF4B/TP53BP2	4
R-HSA-70171	Glycolysis	2/229	71/10654	0.453331	0.890419	0.772521	PFKFB3/PFKFB4	2
R-HSA-2022854	Keratan sulfate biosynthesis	1/229	28/10654	0.456205	0.893154	0.774893	B4GALT5	1
R-HSA-9006931	Signaling by Nuclear Receptors	7/229	299/10654	0.463568	0.901464	0.782103	DHRS9/KANK1/FOS/MOV10/MYC/CXXC5/RXRA	7
R-HSA-170834	Signaling by TGF-beta Receptor Complex	2/229	73/10654	0.467666	0.901464	0.782103	PPP1R15A/MYC	2
R-HSA-8939902	Regulation of RUNX2 expression and activity	2/229	73/10654	0.467666	0.901464	0.782103	PSMB8/STAT1	2
R-HSA-162588	Budding and maturation of HIV virion	1/229	29/10654	0.467924	0.901464	0.782103	CHMP5	1
R-HSA-186763	Downstream signal transduction	1/229	29/10654	0.467924	0.901464	0.782103	STAT1	1
R-HSA-2424491	DAP12 signaling	1/229	30/10654	0.479392	0.906186	0.7862	TYROBP	1
R-HSA-4090294	SUMOylation of intracellular receptors	1/229	30/10654	0.479392	0.906186	0.7862	RXRA	1
R-HSA-442742	CREB1 phosphorylation through NMDA receptor-mediated activation of RAS signaling	1/229	30/10654	0.479392	0.906186	0.7862	RPS6KA1	1
R-HSA-499943	Interconversion of nucleotide di- and triphosphates	1/229	30/10654	0.479392	0.906186	0.7862	TXN	1
R-HSA-5683826	Surfactant metabolism	1/229	30/10654	0.479392	0.906186	0.7862	ADORA2A	1
R-HSA-6804758	Regulation of TP53 Activity through Acetylation	1/229	30/10654	0.479392	0.906186	0.7862	PML	1
R-HSA-9006925	Intracellular signaling by second messengers	7/229	305/10654	0.484412	0.912813	0.791949	PIK3AP1/ICOS/MOV10/PML/PSMB8/IER3/CD86	7
R-HSA-1296065	Inwardly rectifying K+ channels	1/229	31/10654	0.490614	0.918758	0.797107	KCNJ2	1
R-HSA-1839124	FGFR1 mutant receptor activation	1/229	31/10654	0.490614	0.918758	0.797107	STAT1	1
R-HSA-2132295	MHC class II antigen presentation	3/229	123/10654	0.495155	0.922139	0.80004	IFI30/CTSL/LAG3	3
R-HSA-2173789	TGF-beta receptor signaling activates SMADs	1/229	32/10654	0.501594	0.922139	0.80004	PPP1R15A	1
R-HSA-2173796	SMAD2/SMAD3:SMAD4 heterotrimer regulates transcription	1/229	32/10654	0.501594	0.922139	0.80004	MYC	1
R-HSA-2871796	FCERI mediated MAPK activation	1/229	32/10654	0.501594	0.922139	0.80004	FOS	1
R-HSA-917729	Endosomal Sorting Complex Required For Transport (ESCRT)	1/229	32/10654	0.501594	0.922139	0.80004	CHMP5	1
R-HSA-983695	Antigen activates B Cell Receptor (BCR) leading to generation of second messengers	1/229	32/10654	0.501594	0.922139	0.80004	PIK3AP1	1
R-HSA-381426	Regulation of Insulin-like Growth Factor (IGF) transport and uptake by Insulin-like Growth Factor Binding Proteins (IGFBPs)	3/229	125/10654	0.505943	0.924972	0.802499	VCAN/IL6/SPP1	3
R-HSA-2871809	FCERI mediated Ca+2 mobilization	1/229	33/10654	0.51234	0.924972	0.802499	ITK	1
R-HSA-4085001	Sialic acid metabolism	1/229	33/10654	0.51234	0.924972	0.802499	NEU4	1
R-HSA-5693568	Resolution of D-loop Structures through Holliday Junction Intermediates	1/229	33/10654	0.51234	0.924972	0.802499	NBN	1
R-HSA-8964043	Plasma lipoprotein clearance	1/229	33/10654	0.51234	0.924972	0.802499	LDLR	1
R-HSA-9022692	Regulation of MECP2 expression and activity	1/229	33/10654	0.51234	0.924972	0.802499	MOV10	1
R-HSA-9607240	FLT3 Signaling	6/229	267/10654	0.514416	0.92595	0.803346	CSF2/DUSP5/RASGRP3/IL2RA/PSMB8/RAPGEF2	6
R-HSA-1638074	Keratan sulfate/keratin metabolism	1/229	34/10654	0.522854	0.927297	0.804515	B4GALT5	1
R-HSA-187687	Signalling to ERKs	1/229	34/10654	0.522854	0.927297	0.804515	MAPKAPK3	1
R-HSA-192105	Synthesis of bile acids and bile salts	1/229	34/10654	0.522854	0.927297	0.804515	RXRA	1
R-HSA-5693537	Resolution of D-Loop Structures	1/229	34/10654	0.522854	0.927297	0.804515	NBN	1
R-HSA-70263	Gluconeogenesis	1/229	34/10654	0.522854	0.927297	0.804515	SLC37A2	1
R-HSA-8939211	ESR-mediated signaling	5/229	223/10654	0.525584	0.929405	0.806344	KANK1/FOS/MOV10/MYC/CXXC5	5
R-HSA-1236974	ER-Phagosome pathway	2/229	83/10654	0.53585	0.942034	0.817301	PSMB8/TAP1	2
R-HSA-69202	Cyclin E associated events during G1/S transition	2/229	83/10654	0.53585	0.942034	0.817301	MYC/PSMB8	2
R-HSA-1483255	PI Metabolism	2/229	84/10654	0.542333	0.942081	0.817342	TNFAIP8/PI4K2B	2
R-HSA-1222556	ROS and RNS production in phagocytes	1/229	36/10654	0.543211	0.942081	0.817342	NCF1	1
R-HSA-190861	Gap junction assembly	1/229	36/10654	0.543211	0.942081	0.817342	GJB2	1
R-HSA-5663213	RHO GTPases Activate WASPs and WAVEs	1/229	36/10654	0.543211	0.942081	0.817342	WAS	1
R-HSA-216083	Integrin cell surface interactions	2/229	85/10654	0.548754	0.942081	0.817342	PECAM1/SPP1	2
R-HSA-425366	Transport of bile salts and organic acids, metal ions and amine compounds	2/229	85/10654	0.548754	0.942081	0.817342	SLC39A8/SLC16A3	2
R-HSA-69656	Cyclin A:Cdk2-associated events at S phase entry	2/229	85/10654	0.548754	0.942081	0.817342	MYC/PSMB8	2
R-HSA-5685938	HDR through Single Strand Annealing (SSA)	1/229	37/10654	0.553062	0.942081	0.817342	NBN	1
R-HSA-5689901	Metalloprotease DUBs	1/229	37/10654	0.553062	0.942081	0.817342	NLRP3	1
R-HSA-75105	Fatty acyl-CoA biosynthesis	1/229	37/10654	0.553062	0.942081	0.817342	ACSL1	1
R-HSA-8956319	Nucleobase catabolism	1/229	37/10654	0.553062	0.942081	0.817342	NT5C3A	1
R-HSA-5628897	TP53 Regulates Metabolic Genes	2/229	86/10654	0.555111	0.942906	0.818058	MOV10/TXN	2
R-HSA-3232142	SUMOylation of ubiquitinylation proteins	1/229	38/10654	0.562702	0.945361	0.820188	PML	1
R-HSA-5655302	Signaling by FGFR1 in disease	1/229	38/10654	0.562702	0.945361	0.820188	STAT1	1
R-HSA-8864260	Transcriptional regulation by the AP-2 (TFAP2) family of transcription factors	1/229	38/10654	0.562702	0.945361	0.820188	MYC	1
R-HSA-983712	Ion channel transport	4/229	186/10654	0.569948	0.945361	0.820188	TSC22D3/MLKL/STOM/MCOLN2	4
R-HSA-140877	Formation of Fibrin Clot (Clotting Cascade)	1/229	39/10654	0.572135	0.945361	0.820188	F3	1
R-HSA-390471	Association of TriC/CCT with target proteins during biosynthesis	1/229	39/10654	0.572135	0.945361	0.820188	FBXO6	1
R-HSA-5693616	Presynaptic phase of homologous DNA pairing and strand exchange	1/229	39/10654	0.572135	0.945361	0.820188	NBN	1
R-HSA-977444	GABA B receptor activation	1/229	39/10654	0.572135	0.945361	0.820188	KCNJ2	1
R-HSA-991365	Activation of GABAB receptors	1/229	39/10654	0.572135	0.945361	0.820188	KCNJ2	1
R-HSA-157118	Signaling by NOTCH	5/229	235/10654	0.57244	0.945361	0.820188	LFNG/MOV10/MYC/PSMB8/STAT1	5
R-HSA-3371556	Cellular response to heat stress	2/229	89/10654	0.573801	0.945361	0.820188	HSPA1A/HSPA1B	2
R-HSA-1474290	Collagen formation	2/229	90/10654	0.579904	0.95237	0.826268	CTSL/CD151	2
R-HSA-5675221	Negative regulation of MAPK pathway	1/229	40/10654	0.581366	0.95237	0.826268	DUSP5	1
R-HSA-6807070	PTEN Regulation	3/229	140/10654	0.582794	0.95237	0.826268	MOV10/PML/PSMB8	3
R-HSA-3560782	Diseases associated with glycosaminoglycan metabolism	1/229	41/10654	0.590398	0.962064	0.834679	VCAN	1
R-HSA-6804756	Regulation of TP53 Activity through Phosphorylation	2/229	92/10654	0.591917	0.962064	0.834679	NBN/TAF4B	2
R-HSA-5693579	Homologous DNA Pairing and Strand Exchange	1/229	42/10654	0.599236	0.964693	0.83696	NBN	1
R-HSA-1660661	Sphingolipid de novo biosynthesis	1/229	43/10654	0.607884	0.964693	0.83696	SGPP2	1
R-HSA-194068	Bile acid and bile salt metabolism	1/229	43/10654	0.607884	0.964693	0.83696	RXRA	1
R-HSA-2172127	DAP12 interactions	1/229	43/10654	0.607884	0.964693	0.83696	TYROBP	1
R-HSA-975634	Retinoid metabolism and transport	1/229	43/10654	0.607884	0.964693	0.83696	LDLR	1
R-HSA-1592230	Mitochondrial biogenesis	2/229	95/10654	0.609455	0.964693	0.83696	RXRA/HELZ2	2
R-HSA-71387	Metabolism of carbohydrates	6/229	295/10654	0.612419	0.964693	0.83696	VCAN/SLC37A2/PFKFB3/PFKFB4/TKT/B4GALT5	6
R-HSA-2173793	Transcriptional activity of SMAD2/SMAD3:SMAD4 heterotrimer	1/229	44/10654	0.616347	0.964693	0.83696	MYC	1
R-HSA-6811438	Intra-Golgi traffic	1/229	44/10654	0.616347	0.964693	0.83696	STX6	1
R-HSA-4420097	VEGFA-VEGFR2 Pathway	2/229	99/10654	0.631942	0.964693	0.83696	NCF1/MAPKAPK3	2
R-HSA-1474244	Extracellular matrix organization	6/229	301/10654	0.631964	0.964693	0.83696	VCAN/CTSL/PECAM1/SPP1/ADAM19/CD151	6
R-HSA-8854214	TBC/RABGAPs	1/229	46/10654	0.63273	0.964693	0.83696	TBC1D10C	1
R-HSA-167161	HIV Transcription Initiation	1/229	47/10654	0.640658	0.964693	0.83696	TAF4B	1
R-HSA-167162	RNA Polymerase II HIV Promoter Escape	1/229	47/10654	0.640658	0.964693	0.83696	TAF4B	1
R-HSA-190828	Gap junction trafficking	1/229	47/10654	0.640658	0.964693	0.83696	GJB2	1
R-HSA-2122947	NOTCH1 Intracellular Domain Regulates Transcription	1/229	47/10654	0.640658	0.964693	0.83696	MYC	1
R-HSA-437239	Recycling pathway of L1	1/229	47/10654	0.640658	0.964693	0.83696	RPS6KA1	1
R-HSA-6806667	Metabolism of fat-soluble vitamins	1/229	47/10654	0.640658	0.964693	0.83696	LDLR	1
R-HSA-73776	RNA Polymerase II Promoter Escape	1/229	47/10654	0.640658	0.964693	0.83696	TAF4B	1
R-HSA-73779	RNA Polymerase II Transcription Pre-Initiation And Promoter Opening	1/229	47/10654	0.640658	0.964693	0.83696	TAF4B	1
R-HSA-75953	RNA Polymerase II Transcription Initiation	1/229	47/10654	0.640658	0.964693	0.83696	TAF4B	1
R-HSA-76042	RNA Polymerase II Transcription Initiation And Promoter Clearance	1/229	47/10654	0.640658	0.964693	0.83696	TAF4B	1
R-HSA-977606	Regulation of Complement cascade	1/229	47/10654	0.640658	0.964693	0.83696	C5AR1	1
R-HSA-15869	Metabolism of nucleotides	2/229	101/10654	0.642803	0.964693	0.83696	NT5C3A/TXN	2
R-HSA-9006936	Signaling by TGF-beta family members	2/229	102/10654	0.648139	0.964693	0.83696	PPP1R15A/MYC	2
R-HSA-418597	G alpha (z) signalling events	1/229	48/10654	0.648416	0.964693	0.83696	RGS19	1
R-HSA-2187338	Visual phototransduction	2/229	103/10654	0.653411	0.964693	0.83696	DHRS9/LDLR	2
R-HSA-157858	Gap junction trafficking and regulation	1/229	49/10654	0.656008	0.964693	0.83696	GJB2	1
R-HSA-6791312	TP53 Regulates Transcription of Cell Cycle Genes	1/229	49/10654	0.656008	0.964693	0.83696	RGCC	1
R-HSA-6811440	Retrograde transport at the Trans-Golgi-Network	1/229	49/10654	0.656008	0.964693	0.83696	STX6	1
R-HSA-9012852	Signaling by NOTCH3	1/229	49/10654	0.656008	0.964693	0.83696	STAT1	1
R-HSA-1236978	Cross-presentation of soluble exogenous antigens (endosomes)	1/229	50/10654	0.663436	0.964693	0.83696	PSMB8	1
R-HSA-1793185	Chondroitin sulfate/dermatan sulfate metabolism	1/229	50/10654	0.663436	0.964693	0.83696	VCAN	1
R-HSA-211733	Regulation of activated PAK-2p34 by proteasome mediated degradation	1/229	50/10654	0.663436	0.964693	0.83696	PSMB8	1
R-HSA-211945	Phase I - Functionalization of compounds	2/229	106/10654	0.668852	0.964693	0.83696	CYP4B1/RXRA	2
R-HSA-350562	Regulation of ornithine decarboxylase (ODC)	1/229	51/10654	0.670704	0.964693	0.83696	PSMB8	1
R-HSA-194138	Signaling by VEGF	2/229	107/10654	0.673875	0.964693	0.83696	NCF1/MAPKAPK3	2
R-HSA-180534	Vpu mediated degradation of CD4	1/229	52/10654	0.677816	0.964693	0.83696	PSMB8	1
R-HSA-349425	Autodegradation of the E3 ubiquitin ligase COP1	1/229	52/10654	0.677816	0.964693	0.83696	PSMB8	1
R-HSA-383280	Nuclear Receptor transcription pathway	1/229	52/10654	0.677816	0.964693	0.83696	RXRA	1
R-HSA-445717	Aquaporin-mediated transport	1/229	52/10654	0.677816	0.964693	0.83696	AQP9	1
R-HSA-69601	Ubiquitin Mediated Degradation of Phosphorylated Cdc25A	1/229	52/10654	0.677816	0.964693	0.83696	PSMB8	1
R-HSA-69610	p53-Independent DNA Damage Response	1/229	52/10654	0.677816	0.964693	0.83696	PSMB8	1
R-HSA-69613	p53-Independent G1/S DNA damage checkpoint	1/229	52/10654	0.677816	0.964693	0.83696	PSMB8	1
R-HSA-75815	Ubiquitin-dependent degradation of Cyclin D	1/229	52/10654	0.677816	0.964693	0.83696	PSMB8	1
R-HSA-163685	Integration of energy metabolism	2/229	108/10654	0.678836	0.964693	0.83696	MARCKS/TKT	2
R-HSA-1912422	Pre-NOTCH Expression and Processing	2/229	109/10654	0.683735	0.964693	0.83696	LFNG/MOV10	2
R-HSA-977225	Amyloid fiber formation	2/229	109/10654	0.683735	0.964693	0.83696	TGFBI/UBE2L6	2
R-HSA-1660499	Synthesis of PIPs at the plasma membrane	1/229	53/10654	0.684775	0.964693	0.83696	PI4K2B	1
R-HSA-169911	Regulation of Apoptosis	1/229	53/10654	0.684775	0.964693	0.83696	PSMB8	1
R-HSA-180585	Vif-mediated degradation of APOBEC3G	1/229	54/10654	0.691584	0.964693	0.83696	PSMB8	1
R-HSA-8848021	Signaling by PTK6	1/229	54/10654	0.691584	0.964693	0.83696	SOCS3	1
R-HSA-8854050	FBXL7 down-regulates AURKA during mitotic entry and in early mitosis	1/229	54/10654	0.691584	0.964693	0.83696	PSMB8	1
R-HSA-9006927	Signaling by Non-Receptor Tyrosine Kinases	1/229	54/10654	0.691584	0.964693	0.83696	SOCS3	1
R-HSA-9604323	Negative regulation of NOTCH4 signaling	1/229	54/10654	0.691584	0.964693	0.83696	PSMB8	1
R-HSA-1638091	Heparan sulfate/heparin (HS-GAG) metabolism	1/229	55/10654	0.698247	0.964693	0.83696	VCAN	1
R-HSA-174113	SCF-beta-TrCP mediated degradation of Emi1	1/229	55/10654	0.698247	0.964693	0.83696	PSMB8	1
R-HSA-4641257	Degradation of AXIN	1/229	55/10654	0.698247	0.964693	0.83696	PSMB8	1
R-HSA-8941858	Regulation of RUNX3 expression and activity	1/229	55/10654	0.698247	0.964693	0.83696	PSMB8	1
R-HSA-9639288	Amino acids regulate mTORC1	1/229	55/10654	0.698247	0.964693	0.83696	FNIP2	1
R-HSA-983231	Factors involved in megakaryocyte development and platelet production	3/229	168/10654	0.704527	0.964693	0.83696	MAFF/IFNB1/IRF1	3
R-HSA-5362768	Hh mutants that don't undergo autocatalytic processing are degraded by ERAD	1/229	56/10654	0.704767	0.964693	0.83696	PSMB8	1
R-HSA-977443	GABA receptor activation	1/229	56/10654	0.704767	0.964693	0.83696	KCNJ2	1
R-HSA-4641258	Degradation of DVL	1/229	57/10654	0.711146	0.964693	0.83696	PSMB8	1
R-HSA-69541	Stabilization of p53	1/229	57/10654	0.711146	0.964693	0.83696	PSMB8	1
R-HSA-166658	Complement cascade	1/229	58/10654	0.717388	0.964693	0.83696	C5AR1	1
R-HSA-2644602	Signaling by NOTCH1 PEST Domain Mutants in Cancer	1/229	58/10654	0.717388	0.964693	0.83696	MYC	1
R-HSA-2644603	Signaling by NOTCH1 in Cancer	1/229	58/10654	0.717388	0.964693	0.83696	MYC	1
R-HSA-2644606	Constitutive Signaling by NOTCH1 PEST Domain Mutants	1/229	58/10654	0.717388	0.964693	0.83696	MYC	1
R-HSA-2894858	Signaling by NOTCH1 HD+PEST Domain Mutants in Cancer	1/229	58/10654	0.717388	0.964693	0.83696	MYC	1
R-HSA-2894862	Constitutive Signaling by NOTCH1 HD+PEST Domain Mutants	1/229	58/10654	0.717388	0.964693	0.83696	MYC	1
R-HSA-5663205	Infectious disease	7/229	383/10654	0.721648	0.964693	0.83696	HSPA1A/HSPA1B/CHMP5/EIF2AK2/PSMB8/TAF4B/ISG15	7
R-HSA-5387390	Hh mutants abrogate ligand secretion	1/229	59/10654	0.723496	0.964693	0.83696	PSMB8	1
R-HSA-5676590	NIK-->noncanonical NF-kB signaling	1/229	59/10654	0.723496	0.964693	0.83696	PSMB8	1
R-HSA-68827	CDT1 association with the CDC6:ORC:origin complex	1/229	59/10654	0.723496	0.964693	0.83696	PSMB8	1
R-HSA-187577	SCF(Skp2)-mediated degradation of p27/p21	1/229	60/10654	0.729473	0.964693	0.83696	PSMB8	1
R-HSA-5607761	Dectin-1 mediated noncanonical NF-kB signaling	1/229	60/10654	0.729473	0.964693	0.83696	PSMB8	1
R-HSA-5610780	Degradation of GLI1 by the proteasome	1/229	60/10654	0.729473	0.964693	0.83696	PSMB8	1
R-HSA-5610783	Degradation of GLI2 by the proteasome	1/229	60/10654	0.729473	0.964693	0.83696	PSMB8	1
R-HSA-5610785	GLI3 is processed to GLI3R by the proteasome	1/229	60/10654	0.729473	0.964693	0.83696	PSMB8	1
R-HSA-2029482	Regulation of actin dynamics for phagocytic cup formation	1/229	61/10654	0.73532	0.964693	0.83696	WAS	1
R-HSA-5678895	Defective CFTR causes cystic fibrosis	1/229	61/10654	0.73532	0.964693	0.83696	PSMB8	1
R-HSA-8878166	Transcriptional regulation by RUNX2	2/229	121/10654	0.737872	0.964693	0.83696	PSMB8/STAT1	2
R-HSA-4086398	Ca2+ pathway	1/229	62/10654	0.741042	0.964693	0.83696	MOV10	1
R-HSA-8986944	Transcriptional Regulation by MECP2	1/229	62/10654	0.741042	0.964693	0.83696	MOV10	1
R-HSA-1226099	Signaling by FGFR in disease	1/229	63/10654	0.746641	0.964693	0.83696	STAT1	1
R-HSA-174084	Autodegradation of Cdh1 by Cdh1:APC/C	1/229	63/10654	0.746641	0.964693	0.83696	PSMB8	1
R-HSA-446219	Synthesis of substrates in N-glycan biosythesis	1/229	63/10654	0.746641	0.964693	0.83696	NEU4	1
R-HSA-1630316	Glycosaminoglycan metabolism	2/229	124/10654	0.750114	0.964693	0.83696	VCAN/B4GALT5	2
R-HSA-9007101	Rab regulation of trafficking	2/229	124/10654	0.750114	0.964693	0.83696	TBC1D10C/RIN2	2
R-HSA-1442490	Collagen degradation	1/229	64/10654	0.752119	0.964693	0.83696	CTSL	1
R-HSA-4608870	Asymmetric localization of PCP proteins	1/229	64/10654	0.752119	0.964693	0.83696	PSMB8	1
R-HSA-913709	O-linked glycosylation of mucins	1/229	64/10654	0.752119	0.964693	0.83696	B4GALT5	1
R-HSA-3108232	SUMO E3 ligases SUMOylate target proteins	3/229	182/10654	0.754389	0.964693	0.83696	NFKBIA/PML/RXRA	3
R-HSA-373755	Semaphorin interactions	1/229	65/10654	0.757479	0.964693	0.83696	TYROBP	1
R-HSA-5358346	Hedgehog ligand biogenesis	1/229	65/10654	0.757479	0.964693	0.83696	PSMB8	1
R-HSA-6796648	TP53 Regulates Transcription of DNA Repair Genes	1/229	65/10654	0.757479	0.964693	0.83696	FOS	1
R-HSA-9614085	FOXO-mediated transcription	1/229	65/10654	0.757479	0.964693	0.83696	TXN	1
R-HSA-1234176	Oxygen-dependent proline hydroxylation of Hypoxia-inducible Factor Alpha	1/229	66/10654	0.762724	0.964693	0.83696	PSMB8	1
R-HSA-69563	p53-Dependent G1 DNA Damage Response	1/229	66/10654	0.762724	0.964693	0.83696	PSMB8	1
R-HSA-69580	p53-Dependent G1/S DNA damage checkpoint	1/229	66/10654	0.762724	0.964693	0.83696	PSMB8	1
R-HSA-174154	APC/C:Cdc20 mediated degradation of Securin	1/229	67/10654	0.767856	0.964693	0.83696	PSMB8	1
R-HSA-5685942	HDR through Homologous Recombination (HRR)	1/229	67/10654	0.767856	0.964693	0.83696	NBN	1
R-HSA-114608	Platelet degranulation	2/229	129/10654	0.769427	0.964693	0.83696	PECAM1/PLEK	2
R-HSA-1500931	Cell-Cell communication	2/229	129/10654	0.769427	0.964693	0.83696	TYROBP/CD151	2
R-HSA-3906995	Diseases associated with O-glycosylation of proteins	1/229	68/10654	0.772877	0.964693	0.83696	LFNG	1
R-HSA-5658442	Regulation of RAS by GAPs	1/229	68/10654	0.772877	0.964693	0.83696	PSMB8	1
R-HSA-68867	Assembly of the pre-replicative complex	1/229	68/10654	0.772877	0.964693	0.83696	PSMB8	1
R-HSA-69615	G1/S DNA Damage Checkpoints	1/229	68/10654	0.772877	0.964693	0.83696	PSMB8	1
R-HSA-8939236	RUNX1 regulates transcription of genes involved in differentiation of HSCs	2/229	130/10654	0.773131	0.964693	0.83696	PSMB8/SPI1	2
R-HSA-2990846	SUMOylation	3/229	188/10654	0.773598	0.964693	0.83696	NFKBIA/PML/RXRA	3
R-HSA-69206	G1/S Transition	2/229	131/10654	0.776783	0.964693	0.83696	MYC/PSMB8	2
R-HSA-174824	Plasma lipoprotein assembly, remodeling, and clearance	1/229	69/10654	0.77779	0.964693	0.83696	LDLR	1
R-HSA-5693571	Nonhomologous End-Joining (NHEJ)	1/229	69/10654	0.77779	0.964693	0.83696	NBN	1
R-HSA-8948751	Regulation of PTEN stability and activity	1/229	69/10654	0.77779	0.964693	0.83696	PSMB8	1
R-HSA-3214841	PKMTs methylate histone lysines	1/229	71/10654	0.787302	0.964693	0.83696	NFKB1	1
R-HSA-68949	Orc1 removal from chromatin	1/229	71/10654	0.787302	0.964693	0.83696	PSMB8	1
R-HSA-76005	Response to elevated platelet cytosolic Ca2+	2/229	134/10654	0.787433	0.964693	0.83696	PECAM1/PLEK	2
R-HSA-174178	APC/C:Cdh1 mediated degradation of Cdc20 and other APC/C:Cdh1 targeted proteins in late mitosis/early G1	1/229	72/10654	0.791904	0.964693	0.83696	PSMB8	1
R-HSA-174184	Cdc20:Phospho-APC/C mediated degradation of Cyclin A	1/229	72/10654	0.791904	0.964693	0.83696	PSMB8	1
R-HSA-69017	CDK-mediated phosphorylation and removal of Cdc6	1/229	72/10654	0.791904	0.964693	0.83696	PSMB8	1
R-HSA-167172	Transcription of the HIV genome	1/229	73/10654	0.796407	0.964693	0.83696	TAF4B	1
R-HSA-179419	APC:Cdc20 mediated degradation of cell cycle proteins prior to satisfation of the cell cycle checkpoint	1/229	73/10654	0.796407	0.964693	0.83696	PSMB8	1
R-HSA-1980143	Signaling by NOTCH1	1/229	73/10654	0.796407	0.964693	0.83696	MYC	1
R-HSA-202733	Cell surface interactions at the vascular wall	2/229	137/10654	0.797636	0.964693	0.83696	PECAM1/SLC16A3	2
R-HSA-162599	Late Phase of HIV Life Cycle	2/229	139/10654	0.804195	0.964693	0.83696	CHMP5/TAF4B	2
R-HSA-1234174	Cellular response to hypoxia	1/229	75/10654	0.805125	0.964693	0.83696	PSMB8	1
R-HSA-176409	APC/C:Cdc20 mediated degradation of mitotic proteins	1/229	75/10654	0.805125	0.964693	0.83696	PSMB8	1
R-HSA-1474228	Degradation of the extracellular matrix	2/229	140/10654	0.807404	0.964693	0.83696	CTSL/SPP1	2
R-HSA-176814	Activation of APC/C and APC/C:Cdc20 mediated degradation of mitotic proteins	1/229	76/10654	0.809343	0.964693	0.83696	PSMB8	1
R-HSA-3000178	ECM proteoglycans	1/229	76/10654	0.809343	0.964693	0.83696	VCAN	1
R-HSA-5693565	Recruitment and ATM-mediated phosphorylation of repair and signaling proteins at DNA double strand breaks	1/229	76/10654	0.809343	0.964693	0.83696	NBN	1
R-HSA-3108214	SUMOylation of DNA damage response and repair proteins	1/229	77/10654	0.813471	0.964693	0.83696	PML	1
R-HSA-5619084	ABC transporter disorders	1/229	77/10654	0.813471	0.964693	0.83696	PSMB8	1
R-HSA-5693606	DNA Double Strand Break Response	1/229	77/10654	0.813471	0.964693	0.83696	NBN	1
R-HSA-8852276	The role of GTSE1 in G2/M progression after G2 checkpoint	1/229	77/10654	0.813471	0.964693	0.83696	PSMB8	1
R-HSA-9009391	Extra-nuclear estrogen signaling	1/229	77/10654	0.813471	0.964693	0.83696	FOS	1
R-HSA-3781865	Diseases of glycosylation	2/229	143/10654	0.816752	0.964693	0.83696	VCAN/LFNG	2
R-HSA-422356	Regulation of insulin secretion	1/229	78/10654	0.817509	0.964693	0.83696	MARCKS	1
R-HSA-446193	Biosynthesis of the N-glycan precursor (dolichol lipid-linked oligosaccharide, LLO) and transfer to a nascent protein	1/229	78/10654	0.817509	0.964693	0.83696	NEU4	1
R-HSA-168255	Influenza Life Cycle	2/229	144/10654	0.819777	0.965139	0.837347	HSPA1A/HSPA1B	2
R-HSA-176408	Regulation of APC/C activators between G1/S and early anaphase	1/229	80/10654	0.825327	0.965139	0.837347	PSMB8	1
R-HSA-2559586	DNA Damage/Telomere Stress Induced Senescence	1/229	80/10654	0.825327	0.965139	0.837347	NBN	1
R-HSA-3858494	Beta-catenin independent WNT signaling	2/229	146/10654	0.825694	0.965139	0.837347	MOV10/PSMB8	2
R-HSA-5663202	Diseases of signal transduction	6/229	377/10654	0.82589	0.965139	0.837347	PIK3AP1/ICOS/MYC/PSMB8/STAT1/CD86	6
R-HSA-438064	Post NMDA receptor activation events	1/229	81/10654	0.82911	0.965296	0.837483	RPS6KA1	1
R-HSA-195253	Degradation of beta-catenin by the destruction complex	1/229	82/10654	0.832811	0.965296	0.837483	PSMB8	1
R-HSA-9013694	Signaling by NOTCH4	1/229	82/10654	0.832811	0.965296	0.837483	PSMB8	1
R-HSA-453279	Mitotic G1-G1/S phases	2/229	149/10654	0.834243	0.965296	0.837483	MYC/PSMB8	2
R-HSA-8957322	Metabolism of steroids	2/229	151/10654	0.839731	0.965296	0.837483	RXRA/HELZ2	2
R-HSA-674695	RNA Polymerase II Pre-transcription Events	1/229	84/10654	0.839976	0.965296	0.837483	TAF4B	1
R-HSA-162587	HIV Life Cycle	2/229	152/10654	0.842413	0.965296	0.837483	CHMP5/TAF4B	2
R-HSA-5632684	Hedgehog 'on' state	1/229	85/10654	0.843443	0.965296	0.837483	PSMB8	1
R-HSA-69002	DNA Replication Pre-Initiation	1/229	85/10654	0.843443	0.965296	0.837483	PSMB8	1
R-HSA-174143	APC/C-mediated degradation of cell cycle proteins	1/229	86/10654	0.846835	0.965296	0.837483	PSMB8	1
R-HSA-2029480	Fcgamma receptor (FCGR) dependent phagocytosis	1/229	86/10654	0.846835	0.965296	0.837483	WAS	1
R-HSA-453276	Regulation of mitotic cell cycle	1/229	86/10654	0.846835	0.965296	0.837483	PSMB8	1
R-HSA-912446	Meiotic recombination	1/229	86/10654	0.846835	0.965296	0.837483	NBN	1
R-HSA-418346	Platelet homeostasis	1/229	88/10654	0.853401	0.970945	0.842384	PECAM1	1
R-HSA-69052	Switching of origins to a post-replicative state	1/229	90/10654	0.859687	0.973561	0.844654	PSMB8	1
R-HSA-8876198	RAB GEFs exchange GTP for GDP on RABs	1/229	90/10654	0.859687	0.973561	0.844654	RIN2	1
R-HSA-201722	Formation of the beta-catenin:TCF transactivating complex	1/229	91/10654	0.862729	0.973561	0.844654	MYC	1
R-HSA-446728	Cell junction organization	1/229	91/10654	0.862729	0.973561	0.844654	CD151	1
R-HSA-69242	S Phase	2/229	161/10654	0.864784	0.973561	0.844654	MYC/PSMB8	2
R-HSA-4086400	PCP/CE pathway	1/229	92/10654	0.865705	0.973561	0.844654	PSMB8	1
R-HSA-1912408	Pre-NOTCH Transcription and Translation	1/229	93/10654	0.868617	0.973561	0.844654	MOV10	1
R-HSA-442755	Activation of NMDA receptors and postsynaptic events	1/229	93/10654	0.868617	0.973561	0.844654	RPS6KA1	1
R-HSA-390466	Chaperonin-mediated protein folding	1/229	95/10654	0.874253	0.976249	0.846986	FBXO6	1
R-HSA-69473	G2/M DNA damage checkpoint	1/229	95/10654	0.874253	0.976249	0.846986	NBN	1
R-HSA-8936459	RUNX1 regulates genes involved in megakaryocyte differentiation and platelet function	1/229	97/10654	0.879648	0.977945	0.848457	MOV10	1
R-HSA-69481	G2/M Checkpoints	2/229	168/10654	0.880137	0.977945	0.848457	NBN/PSMB8	2
R-HSA-162906	HIV Infection	3/229	233/10654	0.881501	0.977945	0.848457	CHMP5/PSMB8/TAF4B	3
R-HSA-5693607	Processing of DNA double-strand break ends	1/229	98/10654	0.882259	0.977945	0.848457	NBN	1
R-HSA-1296071	Potassium Channels	1/229	99/10654	0.884813	0.978977	0.849352	KCNJ2	1
R-HSA-9006934	Signaling by Receptor Tyrosine Kinases	7/229	473/10654	0.888152	0.979902	0.850155	ADORA2A/RPS6KA1/NCF1/SPP1/STAT1/MAPKAPK3/SOCS1	7
R-HSA-391251	Protein folding	1/229	101/10654	0.889757	0.979902	0.850155	FBXO6	1
R-HSA-1428517	The citric acid (TCA) cycle and respiratory electron transport	2/229	174/10654	0.892003	0.979902	0.850155	RXRA/SLC16A3	2
R-HSA-5689603	UCH proteinases	1/229	102/10654	0.89215	0.979902	0.850155	PSMB8	1
R-HSA-382556	ABC-family proteins mediated transport	1/229	103/10654	0.89449	0.980687	0.850836	PSMB8	1
R-HSA-446203	Asparagine N-linked glycosylation	4/229	304/10654	0.896454	0.981056	0.851156	NEU4/FUCA1/ASGR1/B4GALT5	4
R-HSA-8856825	Cargo recognition for clathrin-mediated endocytosis	1/229	106/10654	0.901213	0.984477	0.854124	LDLR	1
R-HSA-425393	Transport of inorganic cations/anions and amino acids/oligopeptides	1/229	108/10654	0.905456	0.986774	0.856117	SLC26A6	1
R-HSA-71291	Metabolism of amino acids and derivatives	5/229	372/10654	0.906589	0.986774	0.856117	PPM1K/IL4I1/IDO1/PSMB8/SAT1	5
R-HSA-425407	SLC-mediated transmembrane transport	3/229	251/10654	0.909953	0.987985	0.857168	SLC39A8/SLC26A6/SLC16A3	3
R-HSA-948021	Transport to the Golgi and subsequent modification	2/229	185/10654	0.910978	0.987985	0.857168	FUCA1/B4GALT5	2
R-HSA-5173105	O-linked glycosylation	1/229	112/10654	0.913405	0.988839	0.857909	B4GALT5	1
R-HSA-5610787	Hedgehog 'off' state	1/229	113/10654	0.915286	0.9891	0.858135	PSMB8	1
R-HSA-1500620	Meiosis	1/229	118/10654	0.924099	0.995056	0.863302	NBN	1
R-HSA-373760	L1CAM interactions	1/229	119/10654	0.925748	0.995056	0.863302	RPS6KA1	1
R-HSA-69239	Synthesis of DNA	1/229	119/10654	0.925748	0.995056	0.863302	PSMB8	1
R-HSA-5617472	Activation of anterior HOX genes in hindbrain development during early embryogenesis	1/229	122/10654	0.930486	0.996595	0.864638	RXRA	1
R-HSA-5619507	Activation of HOX genes during differentiation	1/229	122/10654	0.930486	0.996595	0.864638	RXRA	1
R-HSA-73894	DNA Repair	4/229	334/10654	0.932262	0.996727	0.864752	NBN/TRIM25/UBE2L6/ISG15	4
R-HSA-69306	DNA Replication	1/229	127/10654	0.937723	0.998351	0.866161	PSMB8	1
R-HSA-112314	Neurotransmitter receptors and postsynaptic signal transmission	2/229	206/10654	0.938862	0.998351	0.866161	KCNJ2/RPS6KA1	2
R-HSA-162909	Host Interactions of HIV factors	1/229	129/10654	0.940403	0.998351	0.866161	PSMB8	1
R-HSA-6809371	Formation of the cornified envelope	1/229	129/10654	0.940403	0.998351	0.866161	PI3	1
R-HSA-5693567	HDR through Homologous Recombination (HRR) or Single Strand Annealing (SSA)	1/229	132/10654	0.94421	0.999841	0.867454	NBN	1
R-HSA-1483257	Phospholipid metabolism	2/229	212/10654	0.945168	0.999841	0.867454	TNFAIP8/PI4K2B	2
R-HSA-194840	Rho GTPase cycle	1/229	138/10654	0.951112	0.999841	0.867454	ARAP3	1
R-HSA-5693538	Homology Directed Repair	1/229	138/10654	0.951112	0.999841	0.867454	NBN	1
R-HSA-5576891	Cardiac conduction	1/229	141/10654	0.954237	0.999841	0.867454	KCNJ2	1
R-HSA-211859	Biological oxidations	2/229	222/10654	0.954328	0.999841	0.867454	CYP4B1/RXRA	2
R-HSA-3214847	HATs acetylate histones	1/229	142/10654	0.955233	0.999841	0.867454	YEATS2	1
R-HSA-1474165	Reproduction	1/229	144/10654	0.957163	0.999841	0.867454	NBN	1
R-HSA-8856828	Clathrin-mediated endocytosis	1/229	146/10654	0.959009	0.999841	0.867454	LDLR	1
R-HSA-5358351	Signaling by Hedgehog	1/229	149/10654	0.961631	0.999841	0.867454	PSMB8	1
R-HSA-201681	TCF dependent signaling in response to WNT	2/229	233/10654	0.962717	0.999841	0.867454	MYC/PSMB8	2
R-HSA-5693532	DNA Double-Strand Break Repair	1/229	166/10654	0.973629	0.999841	0.867454	NBN	1
R-HSA-195721	Signaling by WNT	3/229	331/10654	0.975528	0.999841	0.867454	MOV10/MYC/PSMB8	3
R-HSA-9010553	Regulation of expression of SLITs and ROBOs	1/229	171/10654	0.976385	0.999841	0.867454	PSMB8	1
R-HSA-76002	Platelet activation, signaling and aggregation	2/229	262/10654	0.978347	0.999841	0.867454	PECAM1/PLEK	2
R-HSA-5619115	Disorders of transmembrane transporters	1/229	176/10654	0.978855	0.999841	0.867454	PSMB8	1
R-HSA-112315	Transmission across Chemical Synapses	2/229	272/10654	0.982094	0.999841	0.867454	KCNJ2/RPS6KA1	2
R-HSA-3247509	Chromatin modifying enzymes	2/229	274/10654	0.982764	0.999841	0.867454	NFKB1/YEATS2	2
R-HSA-4839726	Chromatin organization	2/229	274/10654	0.982764	0.999841	0.867454	NFKB1/YEATS2	2
R-HSA-2467813	Separation of Sister Chromatids	1/229	190/10654	0.984484	0.999841	0.867454	PSMB8	1
R-HSA-69275	G2/M Transition	1/229	196/10654	0.986414	0.999841	0.867454	PSMB8	1
R-HSA-453274	Mitotic G2-G2/M phases	1/229	198/10654	0.987002	0.999841	0.867454	PSMB8	1
R-HSA-68882	Mitotic Anaphase	1/229	201/10654	0.987838	0.999841	0.867454	PSMB8	1
R-HSA-69620	Cell Cycle Checkpoints	2/229	293/10654	0.98803	0.999841	0.867454	NBN/PSMB8	2
R-HSA-2555396	Mitotic Metaphase and Anaphase	1/229	202/10654	0.988104	0.999841	0.867454	PSMB8	1
R-HSA-6811442	Intra-Golgi and retrograde Golgi-to-ER traffic	1/229	202/10654	0.988104	0.999841	0.867454	STX6	1
R-HSA-1852241	Organelle biogenesis and maintenance	2/229	296/10654	0.988704	0.999841	0.867454	RXRA/HELZ2	2
R-HSA-397014	Muscle contraction	1/229	209/10654	0.989814	0.999841	0.867454	KCNJ2	1
R-HSA-6805567	Keratinization	1/229	214/10654	0.990883	0.999841	0.867454	PI3	1
R-HSA-376176	Signaling by ROBO receptors	1/229	218/10654	0.991657	0.999841	0.867454	PSMB8	1
R-HSA-195258	RHO GTPase Effectors	2/229	327/10654	0.993826	0.999841	0.867454	NCF1/WAS	2
R-HSA-194315	Signaling by Rho GTPases	3/229	455/10654	0.997317	0.999841	0.867454	ARAP3/NCF1/WAS	3
R-HSA-112316	Neuronal System	2/229	413/10654	0.998895	0.999841	0.867454	KCNJ2/RPS6KA1	2
R-HSA-381753	Olfactory Signaling Pathway	1/229	393/10654	0.999834	0.999841	0.867454	RTP4	1
R-HSA-68886	M Phase	1/229	395/10654	0.999841	0.999841	0.867454	PSMB8	1

## Sheet: Table S2
Supplementary Table S2. Common DEGs associated with Interferon and Toll-like Receptor signaling cascades detected by CEMiTool (Modular gene co-expression) and ClusterProfiler (ORA) analyses.
Module M1_Interferon Signaling	Module M2_Interferon Signaling	ClusterProfiler (ORA)_Interferon Signaling	Intersection_M1/ORA	Intersection_M2/ORA		Module M1_Toll-like Receptor	Module M2_Toll-like Receptor	ClusterProfiler (ORA)_Toll Like Receptor	Intersection_M1/ORA	Intersection_M2/ORA
ISG20	IRF1	ADAR	IFI35	IFNB1		CD14	NFKBIA	MAP3K8	TLR7	MAP3K8
MX1	IFITM2	TRIM22	ISG20	IRF8		FOS	NFKB1	TICAM1	MAPKAPK3	NFKBIA
GBP1	IFNGR2	IRF9	IFNG	IFITM3		MAP3K1	HSP90B1	CTSL	RPS6KA1	IRAK2
IFI6	UBE2E1	IFITM3	DDX58	IRF1		IRAK1	MAP3K8	FOS	SOCS1	RIPK2
ADAR	IFITM3	IFI30	IFIT1	SOCS3		MAPKAPK3	TANK	BIRC3	FOS	NFKB1
GBP5	PTPN1	IFITM2	IFI6	IFIT3		MYD88	RIPK2	IRAK2		BIRC3
ISG15	IRF8	USP18	OASL	IFITM2		BIRC2	JUN	IRF7		CTSL
HLA-F	KPNA4	GBP4	HERC5			NFKB2	IRAK2	NFKB1		TICAM1
STAT2	EGR1	GBP5	GBP1			RIPK1	TICAM1	NFKBIA
IFIT2	SOCS3	DDX58	GBP4			SOCS1	PELI1	TLR7
OAS2	IFIT3	IFI6	XAF1			MAPK3	IRAK3	RPS6KA1
GBP4	IFNB1	GBP1	EIF2AK2			RPS6KA1	BIRC3	MAPKAPK3
HERC5		IRF8	STAT2			TLR7	DUSP6	SOCS1
IFIT1		IFI35	SOCS1			MEF2C	CTSL	RIPK2
HLA-G		IFIT2	OAS3				TLR2
STAT1		IFIT1	STAT1
MX2		IFIT3	GBP5
OASL		IFNB1	UBE2L6
IFNG		IFNG	TRIM5
XAF1		IRF1	TRIM21
HLA-C		IRF7	OAS2
PSMB8		ISG20	OAS1
EIF2AK2		MT2A	RSAD2
IFI35		MX1	MX1
TRIM8		MX2	TRIM8
OAS3		OAS1	PSMB8
TRIM21		OAS2	ADAR
NUP214		OAS3	PML
BST2		HERC5	ISG15
RSAD2		PML	MX2
TPR		XAF1	IFIT2
UBE2L6		EIF2AK2	TRIM25
TRIM25		PSMB8	BST2
TRIM26		TRIM21
OAS1		STAT1
SOCS1		STAT2
TRIM5		BST2
CD44		TRIM25
IRF4		TRIM8
DDX58		IFITM1
MAPK3		TRIM5
PML		OASL
GBP3		SOCS1
USP41		SOCS3
IFI27		RSAD2

## Sheet: Table S3
Supplementary Table S3. Meta-significant genes among WBCs and PBMCs datasets (GSE65088, GSE114180, GSE42606 and GSE154911).
EntrezID	Name	CombinedTstat	CombinedPval
432	ASGR1	97699	0
10538	BATF	-184.62	0
8553	BHLHE40	-123.77	0
128346	C1orf162	Inf	0
969	CD69	-149.35	0
1436	CSF1R	152.58	0
2919	CXCL1	-111.17	0
3576	CXCL8	-130.58	0
91351	DDX60L	-139.03	0
1847	DUSP5	-147.6	0
1906	EDN1	-190.03	0
5610	EIF2AK2	-215.15	0
94240	EPSTI1	-133.06	0
2114	ETS2	-157.91	0
57600	FNIP2	-163.03	0
4616	GADD45B	-178.34	0
85441	HELZ2	-185.12	0
55008	HERC6	-190.75	0
3398	ID2	-110.56	0
10964	IFI44L	-186.37	0
3434	IFIT1	-166.13	0
3437	IFIT3	-167.25	0
3458	IFNG	-237.19	0
3569	IL6	-207.75	0
9636	ISG15	-166.9	0
27074	LAMP3	-206.62	0
23764	MAFF	-147.95	0
4599	MX1	-196.36	0
4940	OAS3	-201.71	0
5292	PIM1	-112.93	0
23645	PPP1R15A	-104.2	0
54453	RIN2	-123.46	0
57674	RNF213	-104.61	0
91543	RSAD2	-238.09	0
64108	RTP4	-194.95	0
219285	SAMD9L	-197.71	0
130367	SGPP2	-100.22	0
8651	SOCS1	-185.15	0
6696	SPP1	-105.86	0
1462	VCAN	129.43	0
80149	ZC3H12A	-114.22	0
730249	ACOD1	-126.64	0
103	ADAR	-127.21	0
84830	ADTRP	-128.42	0
205	AK4	-110.61	0
80830	APOL6	-117.7	0
50650	ARHGEF3	-107.61	0
10865	ARID5A	-98965	0
221079	ARL5B	-108.09	0
467	ATF3	-152.66	0
79065	ATG9A	Inf	0
338758	ATP2B1-AS1	-97927	0
9334	B4GALT5	-96219	0
8412	BCAR3	-101.96	0
604	BCL6	-110.05	0
387763	C11orf96	-132.79	0
147339	C18orf25	-99983	0
117144	CATSPER1	98368	0
6347	CCL2	-94825	0
6364	CCL20	-156.66	0
6348	CCL3	-171.09	0
6351	CCL4	-146.47	0
9560	CCL4L2	-128.64	0
6354	CCL7	-108.89	0
6355	CCL8	-130.16	0
952	CD38	-121.49	0
958	CD40	-108.24	0
941	CD80	-96.74	0
9308	CD83	-135.08	0
1052	CEBPD	100.2	0
8837	CFLAR	-104.06	0
51510	CHMP5	-139.3	0
1154	CISH	-123.22	0
129607	CMPK2	-238.3	0
23070	CMTR1	-105.94	0
1435	CSF1	-96335	0
1437	CSF2	-151.7	0
64651	CSRNP1	-99382	0
2920	CXCL2	-150.18	0
23586	DDX58	-162.92	0
55601	DDX60	-168.95	0
79132	DHX58	-176.8	0
28514	DLL1	-128.03	0
123872	DNAAF1	-136.4	0
151636	DTX3L	-131.23	0
79993	ELOVL7	-127.28	0
2012	EMP1	-105.23	0
23344	ESYT1	Inf	0
2123	EVI2A	Inf	0
2124	EVI2B	Inf	0
2152	F3	-141.43	0
80256	FAM214B	Inf	0
355	FAS	-136.25	0
2359	FPR3	133.15	0
23401	FRAT2	104.38	0
53826	FXYD6	-102.91	0
2643	GCH1	-100.14	0
2669	GEM	-124.06	0
2706	GJB2	-157.1	0
2717	GLA	-122.35	0
27239	GPR162	96911	0
145864	HAPLN3	-99642	0
27198	HCAR1	-96831	0
338442	HCAR2	-112.06	0
8843	HCAR3	-132.51	0
92797	HELB	-103.41	0
51191	HERC5	-211.99	0
57801	HES4	-137.25	0
3096	HIVEP1	-127.67	0
84941	HSH2D	-104.31	0
3304	HSPA1B	-95731	0
29851	ICOS	-128.05	0
8870	IER3	-97.56	0
3428	IFI16	-152.68	0
3430	IFI35	-145.03	0
10561	IFI44	-186.01	0
2537	IFI6	-133.07	0
64135	IFIH1	-166.94	0
3433	IFIT2	-139.79	0
24138	IFIT5	-179.1	0
10581	IFITM2	-101.71	0
3593	IL12B	-117.16	0
3552	IL1A	-147.61	0
3553	IL1B	-116.11	0
3557	IL1RN	-147	0
3559	IL2RA	-134.83	0
56300	IL36G	-147.12	0
26525	IL36RN	-110.67	0
3656	IRAK2	-116.66	0
3662	IRF4	-102.69	0
3665	IRF7	-135.77	0
3669	ISG20	-142.38	0
3702	ITK	-96349	0
23189	KANK1	-108.67	0
1316	KLF6	-106.95	0
8564	KMO	-105.3	0
157638	LRATD2	-94626	0
4049	LTA	-101.78	0
4048	LTA4H	Inf	0
4061	LY6E	-113.25	0
1326	MAP3K8	-118	0
7867	MAPKAPK3	97.76	0
84930	MASTL	-118.58	0
255231	MCOLN2	-126.16	0
107075116	MIR3142HG	-140.97	0
197259	MLKL	-95131	0
4319	MMP10	-106.34	0
9242	MSC	-96536	0
4489	MT1A	-113.75	0
4600	MX2	-180.27	0
4609	MYC	-94793	0
4542	MYO1F	95835	0
4683	NBN	-98484	0
3071	NCKAP1L	97.7	0
135112	NCOA7	-147.64	0
129807	NEU4	-115.36	0
93082	NEURL3	-116.89	0
4792	NFKBIA	-117.47	0
64332	NFKBIZ	-161.12	0
58484	NLRC4	97831	0
91662	NLRP12	104.93	0
114548	NLRP3	-109.87	0
9111	NMI	-95297	0
8013	NR4A3	-122.24	0
8439	NSMAF	-121.17	0
51251	NT5C3A	-122.7	0
4938	OAS1	-183.42	0
4939	OAS2	-225.05	0
8638	OASL	-147.42	0
84875	PARP10	-107.11	0
57097	PARP11	-130.65	0
64761	PARP12	-161.18	0
54625	PARP14	-127.56	0
83666	PARP9	-149.54	0
5175	PECAM1	Inf	0
5209	PFKFB3	-97635	0
80055	PGAP1	-98775	0
51131	PHF11	-135.93	0
55300	PI4K2B	-139.6	0
11040	PIM2	-127.08	0
5328	PLAU	-119.09	0
5337	PLD1	-112.98	0
8613	PLPP3	-108.13	0
5359	PLSCR1	-145.31	0
23654	PLXNB2	96956	0
5366	PMAIP1	-131.89	0
5371	PML	-95211	0
51422	PRKAG2	-110.05	0
5734	PTGER4	-140.52	0
5743	PTGS2	-119.14	0
25780	RASGRP3	-95038	0
5996	RGS1	-171.6	0
10287	RGS19	Inf	0
8767	RIPK2	-111.35	0
9781	RNF144A	-121.14	0
6195	RPS6KA1	Inf	0
6256	RXRA	Inf	0
54809	SAMD9	-161.47	0
55337	SHFL	-99235	0
57823	SLAMF7	-142.44	0
28231	SLCO4A1	-121.82	0
162394	SLFN5	-99686	0
8835	SOCS2	-108.12	0
9021	SOCS3	-201.02	0
6672	SP100	-133.32	0
3431	SP110	-159.4	0
11262	SP140	-160.47	0
26010	SPATS2L	-133.19	0
6690	SPINK1	-148.42	0
6773	STAT2	-101.74	0
2040	STOM	-96847	0
10228	STX6	Inf	0
6875	TAF4B	-103.87	0
117289	TAGAP	-138.32	0
6894	TARBP1	-109.36	0
23424	TDRD7	-157.86	0
55603	TENT5A	-154.79	0
9414	TJP2	-103.87	0
51284	TLR7	-117.56	0
116211	TM4SF19	-124.87	0
55281	TMEM140	-140.69	0
7124	TNF	-208.36	0
8743	TNFSF10	-103.14	0
79931	TNIP3	-95938	0
7159	TP53BP2	-101.07	0
7185	TRAF1	-117.43	0
9881	TRANK1	-107.04	0
6737	TRIM21	-103.76	0
10346	TRIM22	-162.42	0
7706	TRIM25	-161.23	0
85363	TRIM5	-145.46	0
81603	TRIM8	Inf	0
27075	TSPAN13	-107.11	0
7295	TXN	-128.73	0
51060	TXNDC12	Inf	0
7296	TXNRD1	-104.16	0
84959	UBASH3B	-122.87	0
9246	UBE2L6	-102.32	0
373856	USP41	-132.37	0
7422	VEGFA	-101.2	0
54739	XAF1	-170.58	0
55689	YEATS2	-110.94	0
81030	ZBP1	-112.83	0
23099	ZBTB43	-100	0
56829	ZC3HAV1	-120.07	0
57169	ZNFX1	-133.51	0
1031	CDKN2C	37078	0.00010015
27348	TOR1B	-37068	0.00010054
84304	NUDT22	37061	0.00010078
8405	SPOP	37048	0.00010131
912	CD1D	37044	0.0001014
115273	RAB42	37041	0.00010149
246330	PELI3	37037	0.00010163
168537	GIMAP7	-37033	0.00010175
22849	CPEB3	-37023	0.0001021
3029	HAGH	37007	0.00010271
3720	JARID2	-37008	0.00010271
22808	MRAS	-37005	0.00010277
3475	IFRD1	-36993	0.00010316
85465	SELENOI	-36992	0.00010316
6674	SPAG1	-36991	0.00010316
7097	TLR2	-36993	0.00010316
22993	HMGXB3	36984	0.00010343
51665	ASB1	36979	0.00010358
23160	WDR43	-36978	0.0001036
5605	MAP2K2	36969	0.00010392
10559	SLC35A1	36963	0.00010416
84689	MS4A14	36952	0.00010458
26118	WSB1	-36946	0.00010479
55884	WSB2	-36894	0.00010709
4037	LRP3	36889	0.00010727
9556	ATP5MPL	36872	0.00010797
201799	TMEM154	36.87	0.00010802
2101	ESRRA	36866	0.00010816
10316	NMUR1	36.86	0.00010835
301	ANXA1	-36856	0.00010838
118487	CHCHD1	36858	0.00010838
6048	RNF5	36856	0.00010838
79641	ROGDI	36855	0.00010839
89849	ATG16L2	36844	0.00010885
140679	SLC32A1	-36839	0.000109
23034	SAMD4A	-36838	0.00010903
63967	CLSPN	-36813	0.00011011
5261	PHKG2	36809	0.00011024
23315	SLC9A8	-36807	0.00011028
51258	MRPL51	36805	0.00011035
10994	ILVBL	36802	0.00011042
7318	UBA7	-36791	0.00011091
116238	TLCD1	-36789	0.00011092
57186	RALGAPA2	-36781	0.00011126
3476	IGBP1	36778	0.00011134
80896	NPL	36774	0.00011142
6853	SYN1	36774	0.00011142
1665	DHX15	-36769	0.00011154
23423	TMED3	36.77	0.00011154
4814	NINJ1	-36764	0.00011169
80142	PTGES2	36764	0.00011169
124540	MSI2	-36754	0.00011212
29083	GTPBP8	-36752	0.00011214
55486	PARL	36751	0.00011214
57617	VPS18	-36.75	0.00011214
644094	PSMC1P12	36722	0.00011343
317671	RFESD	-36716	0.00011362
4855	NOTCH4	36705	0.00011413
340547	VSIG1	36703	0.00011413
90637	ZFAND2A	-36703	0.00011413
746	TMEM258	36694	0.00011449
274	BIN1	36683	0.00011497
55527	FEM1A	36673	0.0001154
9644	SH3PXD2A	-36671	0.00011546
23049	SMG1	-36657	0.00011605
920	CD4	36637	0.00011702
90204	ZSWIM1	36625	0.00011757
199692	ZNF627	36617	0.00011788
6598	SMARCB1	36611	0.00011813
25903	OLFML2B	36603	0.00011848
535	ATP6V0A1	36596	0.00011876
9391	CIAO1	36582	0.00011941
55654	TMEM127	36568	0.00012008
54788	DNAJB12	36555	0.00012066
56978	PRDM8	-36553	0.00012073
60626	RIC8A	36549	0.00012088
56262	LRRC8A	36538	0.00012135
2289	FKBP5	-36537	0.00012137
283989	TSEN54	36512	0.00012262
286336	FAM78A	36498	0.00012325
84273	NOA1	36496	0.00012328
6375	XCL1	-36497	0.00012328
4217	MAP3K5	-36494	0.00012329
381	ARF5	36492	0.00012333
100421796	EEF1A1P19	36484	0.00012372
1545	CYP1B1	36.48	0.00012389
928	CD9	36466	0.00012452
203522	INTS6L	-36465	0.00012452
26156	RSL1D1	36462	0.00012462
121551	BTBD11	-36458	0.00012472
23036	ZNF292	-36458	0.00012472
55175	KLHL11	-36454	0.0001249
9274	BCL7C	36451	0.000125
124222	PAQR4	36422	0.00012646
170463	SSBP4	36405	0.0001273
288	ANK3	-36391	0.00012797
7175	TPR	-36391	0.00012797
2271	FH	-36376	0.00012869
79026	AHNAK	36338	0.00013064
55835	CENPJ	-36339	0.00013064
30817	ADGRE2	36335	0.00013079
51382	ATP6V1D	-36.33	0.00013097
22800	RRAS2	-36322	0.00013137
5176	SERPINF1	36312	0.00013187
5093	PCBP1	36288	0.00013312
6383	SDC2	-36276	0.00013375
537	ATP6AP1	36273	0.00013388
57724	EPG5	-36266	0.00013417
8692	HYAL2	36.26	0.00013442
6760	SS18	-36261	0.00013442
10742	RAI2	-36252	0.00013478
3981	LIG4	-36243	0.00013525
4354	MPP1	-36207	0.00013724
439949	PRKCQ-AS1	-36.19	0.0001382
4286	MITF	-36188	0.00013824
400569	MED11	36177	0.00013884
376497	SLC27A1	36141	0.00014085
64333	ARHGAP9	36138	0.00014097
127254	ERICH3	-36134	0.00014119
401431	ATP6V0E2-AS1	36132	0.00014121
10342	TFG	-36118	0.00014201
10886	NPFFR2	36111	0.00014234
2014	EMP3	36108	0.00014244
9986	RCE1	36105	0.00014257
1282	COL4A1	-36075	0.00014424
8270	LAGE3	36075	0.00014424
56996	SLC12A9	36073	0.00014429
414224	AGAP12P	36062	0.00014492
55026	TMEM255A	-36.05	0.00014559
1796	DOK1	36043	0.00014595
347688	TUBB8	36041	0.00014598
9665	MARF1	36025	0.00014695
9277	WDR46	35997	0.00014862
10277	UBE4B	35983	0.00014944
2885	GRB2	35967	0.00015035
6641	SNTB1	-35961	0.00015067
1327	COX4I1	35948	0.00015143
22876	INPP5F	-35941	0.0001518
22875	ENPP4	-35936	0.00015203
84080	ENKD1	35931	0.0001523
389792	IER5L	35918	0.00015309
56243	KIAA1217	-35906	0.00015372
253959	RALGAPA1	-35906	0.00015372
28964	GIT1	35902	0.00015383
113655	MFSD3	35902	0.00015383
1294	COL7A1	35897	0.00015398
6541	SLC7A1	-35898	0.00015398
170506	DHX36	-35893	0.0001542
347	APOD	35876	0.00015525
6990	DYNLT3	-35862	0.00015599
9637	FEZ2	35862	0.00015599
23760	PITPNB	-35861	0.00015599
341405	ANKRD33	-35851	0.00015661
163859	SDE2	-35849	0.00015661
7050	TGIF1	-35849	0.00015661
57486	NLN	-35832	0.00015764
9545	RAB3D	35828	0.00015773
79697	RIOX1	-35829	0.00015773
8907	AP1M1	35823	0.00015804
84162	KIAA1109	-35811	0.00015873
6714	SRC	-35802	0.00015926
203228	C9orf72	-35794	0.00015977
8527	DGKD	35766	0.00016155
7444	VRK2	35753	0.00016237
54947	LPCAT2	35748	0.00016264
5023	P2RX1	35746	0.00016272
595	CCND1	-35.74	0.00016304
83451	ABHD11	35733	0.00016347
10989	IMMT	35698	0.00016583
10632	ATP5MG	35688	0.00016644
9784	SNX17	35677	0.00016712
7311	UBA52	35.67	0.00016757
132851	SPATA4	35666	0.00016778
5119	CHMP1A	35654	0.00016852
8985	PLOD3	35648	0.00016886
55859	BEX1	-35645	0.00016892
653361	NCF1	35646	0.00016892
79772	MCTP1	-35632	0.00016983
3692	EIF6	35626	0.00017017
9749	PHACTR2	-35619	0.00017054
57704	GBA2	35618	0.0001706
57413	TMIGD3	35616	0.00017065
84181	CHD6	-35.61	0.00017098
942	CD86	35607	0.00017099
4430	MYO1B	-35607	0.00017099
23731	TMEM245	35608	0.00017099
8554	PIAS1	35601	0.00017136
79413	ZBED2	-35578	0.00017293
22882	ZHX2	-35571	0.00017337
26064	RAI14	35563	0.00017389
27345	KCNMB4	35553	0.00017452
339344	MYPOP	35552	0.00017454
9550	ATP6V1G1	35537	0.00017551
9146	HGS	35534	0.00017566
3068	HDGF	35523	0.00017644
133746	JMY	-35519	0.00017659
80223	RAB11FIP1	35518	0.00017659
26499	PLEK2	35509	0.00017722
119032	BORCS7	35484	0.000179
340061	STING1	-35475	0.00017962
9130	FAM50A	35465	0.0001803
9050	PSTPIP2	-35.46	0.00018057
115939	TSR3	35454	0.00018093
10730	YME1L1	-35438	0.00018208
5977	DPF2	35435	0.00018226
100506736	SLFN12L	-35431	0.00018248
51362	CDC40	35409	0.00018413
57673	BEND3	-35404	0.00018438
10534	ZNRD2	35356	0.00018807
90634	N4BP2L1	-35354	0.00018817
4750	NEK1	-35352	0.0001882
9363	RAB33A	-35351	0.0001882
523	ATP6V1A	35315	0.00019098
2535	FZD2	35309	0.00019138
56255	TMX4	35308	0.00019138
255783	INAFM1	-35302	0.00019168
7167	TPI1	35303	0.00019168
2241	FER	-35.3	0.00019181
4913	NTHL1	35296	0.00019206
55330	BLOC1S4	35287	0.00019258
2048	EPHB2	35286	0.00019258
5834	PYGB	35286	0.00019258
201633	TIGIT	-35275	0.00019336
643668	PSMC1P9	35264	0.00019417
3562	IL3	-35262	0.00019426
54998	AURKAIP1	35256	0.00019468
473	RERE	-35249	0.00019515
57089	ENTPD7	-35245	0.00019538
30836	DNTTIP2	-35243	0.00019544
29796	UQCR10	35243	0.00019544
25923	ATL3	-35.22	0.00019724
5266	PI3	-35213	0.00019773
54784	ALKBH4	35.21	0.00019783
6697	SPR	35207	0.00019807
27335	EIF3K	35191	0.00019926
1742	DLG4	35182	0.00019993
55770	EXOC2	-35181	0.00019993
339665	SLC35E4	35179	0.00020005
90141	EFCAB11	35166	0.00020106
88	ACTN2	-35146	0.00020251
8214	DGCR6	35147	0.00020251
81788	NUAK2	35.13	0.00020385
8402	SLC25A11	35.12	0.00020462
150297	C22orf42	-35111	0.00020529
84759	PCGF1	35106	0.00020558
23348	DOCK9	-35091	0.00020683
84069	PLEKHN1	-35082	0.00020754
126074	SWSAP1	35074	0.00020816
5689	PSMB1	35071	0.0002083
343413	FCRL6	35069	0.00020836
23564	DDAH2	35051	0.00020988
113802	HENMT1	35043	0.00021045
284759	SIRPB2	35036	0.00021105
2729	GCLC	-35032	0.0002113
10073	SNUPN	35023	0.00021195
219790	RTKN2	-35.02	0.00021219
4046	LSP1	35016	0.00021231
7411	VBP1	35016	0.00021231
5514	PPP1R10	-35013	0.0002125
6838	SURF6	35011	0.0002126
440577	NPM1P39	35009	0.00021265
2908	NR3C1	-35007	0.00021272
9450	LY86	34997	0.00021342
64979	MRPL36	34997	0.00021342
166929	SGMS2	-34998	0.00021342
23015	GOLGA8A	-34962	0.00021646
999	CDH1	-34957	0.00021674
3482	IGF2R	-34957	0.00021674
6368	CCL23	-34949	0.00021739
116496	NIBAN1	-34946	0.00021755
55914	ERBIN	-34933	0.00021857
8666	EIF3G	34924	0.00021935
53831	GPR84	-34913	0.0002203
9885	OSBPL2	34905	0.00022088
3280	HES1	-34902	0.0002211
51222	ZNF219	34.89	0.0002221
9792	SERTAD2	-34876	0.00022334
729461	FAM230J	34.87	0.00022378
6810	STX4	-34862	0.00022447
28972	SPCS1	34852	0.00022529
8708	B3GALT1	34846	0.0002258
673	BRAF	-34829	0.00022719
286530	P2RY8	34829	0.00022719
55771	PRR11	34804	0.00022946
5619	PRM1	34801	0.00022963
8464	SUPT3H	-34797	0.00022987
7412	VCAM1	-34798	0.00022987
10413	YAP1	-34793	0.00023017
60676	PAPPA2	34786	0.00023071
51449	PCYOX1	34781	0.0002311
81611	ANP32E	-34773	0.00023179
1501	CTNND2	-34.77	0.00023201
4358	MPV17	34767	0.00023213
84230	LRRC8C	-34766	0.00023214
602	BCL3	-34752	0.00023335
10312	TCIRG1	34753	0.00023335
1675	CFD	34743	0.0002341
3579	CXCR2	34734	0.00023482
49854	ZBTB21	-34735	0.00023482
84727	SPSB2	34719	0.00023618
80216	ALPK1	-34704	0.00023756
55608	ANKRD10	-34694	0.00023842
147965	FAM98C	34.67	0.00024076
115761	ARL 11,00	34.66	0.00024168
145370	RPL21P7	34655	0.00024187
54436	SH3TC1	34657	0.00024187
55039	TRMT12	34655	0.00024187
29993	PACSIN1	34653	0.00024196
10308	ZNF267	-34635	0.00024372
10078	TSSC4	34.63	0.00024406
81688	C6orf62	-34625	0.00024448
494470	RNF165	-34609	0.00024604
399715	LINC02649	-34605	0.00024641
5777	PTPN6	34595	0.00024731
23593	HEBP2	34.59	0.00024772
10439	OLFM1	34581	0.00024852
6434	TRA2B	-34572	0.00024938
51465	UBE2J1	-34561	0.00025039
7555	CNBP	34556	0.00025075
8320	EOMES	34556	0.00025075
11103	KRR1	-34554	0.00025086
51160	VPS28	34549	0.00025125
334	APLP2	34546	0.00025148
753	LDLRAD4	-34537	0.0002523
374875	HSD11B1L	-34536	0.00025232
160364	CLEC12A	-34534	0.00025239
2314	FLII	34528	0.00025293
1645	AKR1C1	-34526	0.00025303
4994	OR3A1	-34514	0.0002542
2866	GPR42	-34501	0.00025543
144110	TMEM86A	34501	0.00025543
1027	CDKN1B	34485	0.00025692
7702	ZNF143	34485	0.00025692
646817	SETSIP	34475	0.0002578
177	AGER	34461	0.00025921
55699	IARS2	34.46	0.00025921
10300	KATNB1	34422	0.00026328
6448	SGSH	34421	0.00026335
221416	C6orf223	-34418	0.00026355
9929	JOSD1	-34.41	0.00026422
653269	POTEI	34.41	0.00026422
140706	CCM2L	34377	0.00026771
79847	MFSD13A	34376	0.00026771
1155	TBCB	34361	0.00026936
60468	BACH2	-34348	0.00027066
112869	SGF29	34342	0.00027125
904	CCNT1	-34332	0.00027213
27022	FOXD3	-34332	0.00027213
2023	ENO1	34329	0.00027234
100499481	MED13P1	-34317	0.00027363
132320	SCLT1	-34302	0.00027519
25801	GCA	-34279	0.00027774
1195	CLK1	-34275	0.00027816
1043	CD52	34261	0.00027931
997	CDC34	34263	0.00027931
51690	LSM 7,00	34261	0.00027931
6469	SHH	34262	0.00027931
23253	ANKRD12	-34252	0.00028009
51719	CAB39	34253	0.00028009
7220	TRPC1	-34245	0.0002808
9034	CCRL2	-34242	0.00028099
6892	TAPBP	-34239	0.00028127
84969	TOX2	-34214	0.00028406
283870	BRICD5	34198	0.00028585
10513	APPBP2	34186	0.00028717
28989	NTMT1	34185	0.00028722
80833	APOL3	-34182	0.00028748
7186	TRAF2	-34173	0.00028847
328	APEX1	34153	0.00029067
1901	S1PR1	34144	0.00029167
91544	UBXN11	34137	0.00029238
6388	SDF2	34128	0.00029337
1654	DDX3X	-34107	0.00029588
83443	SF3B5	34093	0.00029734
8878	SQSTM1	-34094	0.00029734
5245	PHB	34088	0.00029792
8019	BRD3	34079	0.00029886
26130	GAPVD1	34063	0.00030073
11237	RNF24	34052	0.00030202
23683	PRKD3	-34039	0.00030347
7329	UBE2I	34037	0.00030364
58475	MS4A7	34024	0.00030509
7136	TNNI2	34024	0.00030509
7051	TGM1	-34019	0.00030554
138716	RPP25L	34008	0.00030679
65243	ZFP69B	-33999	0.0003079
3824	KLRD1	-33961	0.00031254
10635	RAD51AP1	-33961	0.00031254
27230	SERP1	33954	0.0003133
11138	TBC1D8	33949	0.00031377
127687	C1orf122	33948	0.00031385
983	CDK1	-33946	0.00031394
4905	NSF	33938	0.00031483
10743	RAI1	33924	0.00031664
55667	DENND4C	-33918	0.00031728
130399	ACVR1C	-33912	0.00031796
765	CA6	-33908	0.0003183
4363	ABCC1	-33906	0.00031847
57616	TSHZ3	33905	0.00031853
51588	PIAS4	33894	0.00031965
84447	SYVN1	33894	0.00031965
1407	CRY1	-33892	0.00031977
7106	TSPAN4	33891	0.00031977
56971	CEACAM19	33888	0.00032008
6741	SSB	-33883	0.00032044
64743	WDR13	33883	0.00032044
4802	NFYC	33862	0.00032322
8509	NDST2	-33855	0.00032404
79786	KLHL36	-33851	0.00032434
8636	SSNA1	33847	0.00032478
55198	APPL2	33842	0.00032535
599	BCL2L2	33837	0.00032595
3291	HSD11B2	-33.82	0.00032804
3797	KIF3C	33819	0.00032804
124446	TMEM219	33816	0.00032843
26278	SACS	-33811	0.00032888
54795	TRPM4	33807	0.00032935
8973	CHRNA6	-33792	0.00033128
57552	NCEH1	33779	0.00033288
4923	NTSR1	33761	0.00033534
10758	TRAF3IP2	-33759	0.00033541
23558	WBP2	33739	0.00033818
444	ASPH	-33694	0.00034441
7737	RNF113A	33692	0.00034451
80267	EDEM3	33685	0.00034532
527	ATP6V0C	-33645	0.00035091
55636	CHD7	-33645	0.00035091
402	ARL 2,00	33643	0.0003511
50615	IL21R	-33638	0.0003516
115548	FCHO2	33622	0.00035392
57531	HACE1	-33605	0.00035625
57132	CHMP1B	-33603	0.00035638
93010	B3GNT7	-33601	0.00035648
153396	TMEM161B	-33598	0.0003568
79171	RBM42	33592	0.00035756
1975	EIF4B	33.59	0.00035773
64699	TMPRSS3	-33581	0.00035881
56949	XAB2	33582	0.00035881
50943	FOXP3	-33549	0.0003634
7266	DNAJC7	33545	0.00036367
3800	KIF5C	-33546	0.00036367
653464	SRGAP2C	-33545	0.00036367
4731	NDUFV3	33522	0.00036692
8871	SYNJ2	-33514	0.00036802
66004	LYNX1	33512	0.00036821
284119	CAVIN1	33506	0.00036891
64581	CLEC7A	-33495	0.00037046
3913	LAMB2	33474	0.00037357
142940	TRUB1	-33472	0.00037384
10981	RAB32	33456	0.00037607
2820	GPD2	-33452	0.00037668
2308	FOXO1	-33444	0.00037764
2015	ADGRE1	-33443	0.00037776
30827	CXXC1	33437	0.00037858
50855	PARD6A	33419	0.00038123
7074	TIAM1	-33418	0.00038127
84279	PRADC1	33408	0.00038267
55279	ZNF654	-33384	0.00038625
53829	P2RY13	33378	0.00038717
5908	RAP1B	-33372	0.00038792
2548	GAA	33371	0.00038793
83259	PCDH11Y	33367	0.00038849
574016	CLLU1-AS1	-33365	0.00038866
56997	COQ8A	33349	0.00039106
5330	PLCB2	33.34	0.00039231
6676	SPAG4	-33331	0.0003935
79183	TTPAL	-33331	0.0003935
10552	ARPC1A	33.33	0.00039356
642311	BMS1P15	33322	0.00039464
2790	GNG10	-33318	0.00039518
5155	PDGFB	-33299	0.00039776
11284	PNKP	33.3	0.00039776
7076	TIMP1	33301	0.00039776
1728	NQO1	-33298	0.00039778
401152	C4orf3	-33.29	0.00039901
4696	NDUFA3	33277	0.000401
153339	TMEM167A	33275	0.00040121
226	ALDOA	33251	0.00040505
55633	TBC1D22B	-33243	0.00040617
55127	HEATR1	-33216	0.00041066
3932	LCK	33208	0.00041187
79008	SLX1B	33202	0.0004128
90075	ZNF30	33199	0.00041303
427	ASAH1	-33198	0.0004131
51338	MS4A4A	33187	0.0004148
8972	MGAM	-33136	0.00042357
6013	RLN1	-33131	0.00042393
10735	STAG2	-33131	0.00042393
221400	TDRD6	-33132	0.00042393
28956	LAMTOR2	33127	0.00042444
5566	PRKACA	33122	0.00042508
55967	NDUFA12	33117	0.00042588
51339	DACT1	-33113	0.00042634
55810	FOXJ2	33.11	0.00042687
5441	POLR2L	33.1	0.00042832
5986	RFNG	33.08	0.00043184
3112	HLA-DOB	-33053	0.00043655
1051	CEBPB	33048	0.00043716
100	ADA	-33036	0.00043923
960	CD44	-33026	0.00044059
54891	INO80D	-33026	0.00044059
23338	JADE2	-33027	0.00044059
8175	SF3A2	32985	0.00044788
23111	SPART	-32979	0.00044892
643834	PGA3	32969	0.00045054
51526	OSER1	32961	0.00045195
3673	ITGA2	-32949	0.00045396
54682	MANSC1	32.94	0.00045526
6337	SCNN1A	32941	0.00045526
923	CD6	32928	0.00045733
3563	IL3RA	-32922	0.00045831
152742	LINC01085	32.91	0.0004604
151903	CCDC12	32902	0.00046182
5338	PLD2	32896	0.00046259
55920	RCC2	32896	0.00046259
4302	MLLT6	-32892	0.00046322
8339	H2BC8	-32883	0.00046469
23379	ICE1	-32859	0.000469
3678	ITGA5	32859	0.000469
838	CASP5	-32.85	0.00047067
56666	PANX2	32849	0.00047069
9149	DYRK1B	32847	0.00047078
114882	OSBPL8	-32842	0.00047153
11334	TUSC2	32839	0.0004721
216	ALDH1A1	32835	0.00047255
80184	CEP290	-32817	0.00047596
521	ATP5ME	32803	0.00047852
23786	BCL2L13	-32801	0.00047882
5140	PDE3B	-32.79	0.00048078
3687	ITGAX	-32786	0.00048127
23630	KCNE5	-32772	0.00048388
79792	GSDMD	-32768	0.0004845
1445	CSK	32767	0.00048451
55356	SLC22A15	32.76	0.00048579
29855	UBN1	32759	0.00048587
7528	YY1	32752	0.0004871
1130	LYST	-32751	0.00048715
4552	MTRR	-32749	0.00048735
7402	UTRN	-32733	0.00049038
375449	MAST4	-32725	0.00049176
64853	AIDA	-32.72	0.00049258
1234	CCR5	-32718	0.00049283
10946	SF3A3	32709	0.00049452
115207	KCTD12	32701	0.00049592
3880	KRT19	32691	0.00049788
195827	PRXL2C	-32682	0.00049927
7016	TESK1	32682	0.00049927
10975	UQCR11	32674	0.00050069
10067	SCAMP3	32.67	0.00050146
83608	C18orf21	32667	0.00050182
84851	TRIM52	32661	0.00050281
51366	UBR5	-32659	0.00050307
100287639	MTHFD2P1	-32655	0.0005038
64167	ERAP2	-32643	0.00050596
653781	POTEJ	32636	0.00050721
54732	TMED9	32634	0.00050744
57602	USP36	-32.63	0.00050823
913	CD1E	32623	0.00050941
8520	HAT1	-32603	0.00051349
4713	NDUFB7	32601	0.00051365
151325	MYADML	32585	0.00051704
11024	LILRA1	32577	0.00051851
643	CXCR5	-32571	0.00051956
9759	HDAC4	-32569	0.00051988
138639	PTPDC1	-32566	0.00052023
9807	IP6K1	32547	0.00052414
374872	PEAK3	32544	0.00052465
3326	HSP90AB1	-32539	0.00052545
90580	TIMM29	32536	0.00052597
92092	ZC3HAV1L	-32532	0.00052659
51571	CYRIB	32522	0.00052855
55971	BAIAP2L1	-32516	0.00052969
1396	CRIP1	32501	0.00053268
51259	TMEM216	32497	0.00053338
55777	MBD5	-32489	0.00053509
81543	LRRC3	-32486	0.0005352
83659	TEKT1	-32487	0.0005352
10062	NR1H3	32.48	0.00053639
4607	MYBPC3	32475	0.00053712
23180	RFTN1	-32475	0.00053712
55344	PLCXD1	-32467	0.00053868
389015	SLC9A4	32465	0.00053887
1844	DUSP2	-32459	0.00053994
2280	FKBP1A	32453	0.00054121
4043	LRPAP1	32451	0.00054121
54557	SGTB	-32451	0.00054121
9797	TATDN2	32445	0.00054228
152330	CNTN4	32.44	0.00054336
1657	DMXL1	-32436	0.00054393
1823	DSC1	32417	0.00054806
147495	APCDD1	32405	0.00055056
5048	PAFAH1B1	32386	0.00055472
51573	GDE1	32.38	0.00055596
2752	GLUL	-32365	0.00055903
90809	PIP4P1	-32361	0.0005597
54978	SLC35F6	32361	0.0005597
123803	NTAN1	32358	0.00056003
23531	MMD	-32356	0.00056034
513	ATP5F1D	32343	0.00056318
84148	KAT8	32.34	0.00056364
9525	VPS4B	32332	0.00056532
441478	NRARP	-32327	0.0005663
64802	NMNAT1	32316	0.0005686
79668	PARP8	-32306	0.00057065
5547	PRCP	32305	0.00057086
5606	MAP2K3	-32283	0.00057578
8417	STX7	32274	0.00057763
26051	PPP1R16B	-32268	0.00057883
2958	GTF2A2	32247	0.00058364
6404	SELPLG	32245	0.00058393
9191	DEDD	32.24	0.00058498
51234	EMC4	32239	0.00058512
55009	FAM174C	32219	0.00058956
1306	COL15A1	-32216	0.00059011
10606	PAICS	-32203	0.0005931
272	AMPD3	-32201	0.00059339
5670	PSG2	32193	0.0005951
57584	ARHGAP21	-32176	0.00059897
822	CAPG	32169	0.00060066
57539	WDR35	-32165	0.00060129
339745	SPOPL	32159	0.00060264
1393	CRHBP	32144	0.00060601
6125	RPL5	32144	0.00060601
54539	NDUFB11	32135	0.0006079
81553	CYRIA	-32128	0.00060948
54989	ZNF770	-32125	0.00061009
402160	CFAP99	-32119	0.00061139
3213	HOXB3	-32106	0.00061434
5024	P2RX3	32093	0.00061749
113791	PIK3IP1	32078	0.00062113
3575	IL7R	-32073	0.00062215
5611	DNAJC3	-32067	0.00062345
57085	AGTRAP	32057	0.00062549
55139	ANKZF1	32057	0.00062549
1601	DAB2	-32053	0.00062629
56995	TULP4	-32.05	0.00062691
58538	MPP4	32048	0.00062716
1010	CDH12	32047	0.00062725
10203	CALCRL	-32021	0.00063355
11214	AKAP13	-32017	0.0006345
8611	PLPP1	-32015	0.00063467
81490	PTDSS2	32014	0.00063476
653519	GPR89A	-32012	0.00063499
4647	MYO7A	32011	0.00063513
116983	ACAP3	32008	0.00063539
10560	SLC19A2	-32009	0.00063539
55845	BRK1	32005	0.00063606
51109	RDH11	32001	0.00063674
10093	ARPC4	31997	0.00063765
23603	CORO1C	-31995	0.00063778
79854	LINC00115	-31993	0.0006381
158248	TTC16	31988	0.0006392
54498	SMOX	-31986	0.00063967
8496	PPFIBP1	-31.98	0.00064078
687	KLF9	-31975	0.00064181
5863	RGL2	31975	0.00064181
55802	DCP1A	-31953	0.00064746
11123	RCAN3	-31921	0.00065559
148113	CILP2	-31907	0.00065923
6498	SKIL	-31903	0.00066009
1072	CFL1	31901	0.0006603
10960	LMAN2	31893	0.00066228
91227	GGTLC2	31892	0.00066242
55824	PAG1	-31882	0.00066489
10587	TXNRD2	31878	0.00066569
55766	H2AJ	-31872	0.00066696
728945	PPIAL4F	31872	0.00066696
402665	IGLON5	-31.87	0.00066711
25940	FAM98A	-31869	0.00066723
10459	MAD2L2	-31865	0.00066795
84191	CIAO2A	31863	0.00066803
6509	SLC1A4	-31864	0.00066803
25827	FBXL2	31862	0.00066818
57655	GRAMD1A	-31856	0.00066956
79664	ICE2	-31843	0.00067278
9094	UNC119	31836	0.00067454
3849	KRT2	31834	0.00067497
9751	SNPH	31823	0.00067763
4301	AFDN	-31821	0.00067818
23287	AGTPBP1	31816	0.00067913
57688	ZSWIM6	-31815	0.00067913
51083	GAL	-31806	0.00068146
26037	SIPA1L1	-31794	0.00068473
10248	POP7	31788	0.00068595
160760	PPTC7	-31775	0.00068959
6310	ATXN1	31774	0.00068965
2207	FCER1G	31768	0.00069109
6945	MLX	31766	0.00069139
1652	DDT	31753	0.00069438
8428	STK24	31753	0.00069438
59341	TRPV4	31753	0.00069438
23528	ZNF281	31737	0.00069857
80321	CEP70	-31732	0.00069975
4548	MTR	-31726	0.00070117
54676	GTPBP2	-31722	0.00070201
55331	ACER3	31.72	0.00070246
25824	PRDX5	31714	0.00070392
11221	DUSP10	-31.71	0.00070483
10973	ASCC3	-31707	0.00070536
10772	SRSF10	-31706	0.00070536
1241	LTB4R	31699	0.00070721
729458	MBD3L2B	31684	0.00071138
6988	TCTA	31673	0.00071425
10018	BCL2L11	-31671	0.00071448
29801	ZDHHC8	31672	0.00071448
23588	KLHDC2	31669	0.00071489
7416	VDAC1	31667	0.00071498
84807	NFKBID	-31652	0.00071915
25813	SAMM50	31644	0.00072139
1340	COX6B1	31636	0.00072312
257144	GCSAM	-31636	0.00072312
5151	PDE8A	-31637	0.00072312
79754	ASB13	31633	0.00072346
23171	GPD1L	31.63	0.00072415
26682	OR4F4	31629	0.00072415
3957	LGALS2	31627	0.00072472
57666	FBRSL1	31612	0.00072894
23594	ORC6	31606	0.00073023
51337	THEM6	31603	0.00073102
26471	NUPR1	31593	0.00073388
8406	SRPX	-31585	0.00073591
55236	UBA6	-31576	0.00073843
1020	CDK5	31572	0.0007392
29015	SLC43A3	-31562	0.00074197
7423	VEGFB	31545	0.00074712
56833	SLAMF8	31533	0.00075043
10901	DHRS4	31527	0.0007521
6732	SRPK1	-31526	0.0007522
762	CA4	31516	0.00075482
3570	IL6R	-31508	0.00075713
7283	TUBG1	31505	0.00075787
55048	VPS37C	31502	0.00075842
144717	PHETA1	31498	0.0007594
114815	SORCS1	31483	0.00076385
80700	UBXN6	31476	0.00076593
8685	MARCO	31473	0.0007665
644168	DRGX	-31469	0.00076664
26122	EPC2	-31469	0.00076664
54733	SLC35F2	-31469	0.00076664
56674	TMEM9B	31471	0.00076664
54904	NSD3	-31459	0.00076918
90864	SPSB3	31459	0.00076918
7941	PLA2G7	-31453	0.00077088
353514	LILRA5	31.44	0.00077462
8674	VAMP4	-31432	0.00077682
987	LRBA	-31429	0.00077763
122786	FRMD6	-31427	0.00077768
9019	MPZL1	-31426	0.00077768
284415	VSTM1	31426	0.00077768
689	BTF3	31423	0.00077811
9805	SCRN1	31424	0.00077811
23327	NEDD4L	-31415	0.00078048
27177	IL36B	-31401	0.00078474
163782	KANK4	31.39	0.00078777
114818	KLHL29	-31.39	0.00078777
10978	CLP 1	31381	0.00079039
482	ATP1B2	31378	0.00079098
2063	NR2F6	31376	0.00079136
3987	LIMS1	-31373	0.00079205
5621	PRNP	-31354	0.00079785
8545	CGGBP1	-31346	0.00080011
7388	UQCRH	31346	0.00080011
994	CDC25B	31345	0.00080019
1577	CYP3A5	-31335	0.00080271
64320	RNF25	31335	0.00080271
25979	DHRS7B	31.33	0.0008041
55262	MAP11	31309	0.00081072
8202	NCOA3	-31309	0.00081072
6489	ST8SIA1	-31296	0.00081456
153443	SRFBP1	-31295	0.00081463
831	CAST	-31292	0.00081508
9816	URB2	-31293	0.00081508
10443	N4BP2L2	-31288	0.00081594
54830	NUP62CL	-31288	0.00081594
643677	CCDC168	-31284	0.00081686
9554	SEC22B	-31278	0.00081863
58489	ABHD17C	-31268	0.00082133
8850	KAT2B	-31269	0.00082133
51429	SNX9	-31267	0.00082133
3034	HAL	31264	0.00082184
7486	WRN	-31264	0.00082184
27436	EML4	-31251	0.00082574
84326	METTL26	31251	0.00082574
2208	FCER2	31245	0.00082739
93100	NAPRT	31241	0.00082848
51092	SIDT2	31232	0.00083134
221092	HNRNPUL2	31229	0.00083216
56975	FAM20C	31224	0.00083284
80012	PHC3	-31225	0.00083284
65078	RTN4R	31226	0.00083284
79657	RPAP3	-31221	0.00083359
2519	FUCA2	31214	0.00083532
221710	SMIM13	-31215	0.00083532
55038	CDCA4	-31205	0.00083809
653308	ASAH2B	-31202	0.00083878
9551	ATP5MF	31196	0.00084067
8317	CDC7	-31183	0.0008449
55644	OSGEP	31177	0.00084663
88455	ANKRD13A	31153	0.00085473
55605	KIF21A	-31151	0.00085509
84188	FAR1	31.13	0.00086225
100996335	FAM230H	31125	0.00086357
79004	CUEDC2	31121	0.00086501
54462	CCSER2	-31113	0.0008675
9567	GTPBP1	-31105	0.00086984
2077	ERF	31102	0.00087077
56998	CTNNBIP1	31096	0.00087237
25920	NELFB	31092	0.00087369
2324	FLT4	-31086	0.00087547
9582	APOBEC3B	-31079	0.00087765
11073	TOPBP1	31077	0.00087822
7316	UBC	-31075	0.00087837
7525	YES1	-31072	0.00087941
57102	C12orf4	-31069	0.00088018
10423	CDIPT	31065	0.00088096
81605	URM1	31065	0.00088096
5671	PSG3	31061	0.00088191
23352	UBR4	-31.06	0.00088206
1025	CDK9	31059	0.00088219
8556	CDC14A	-31056	0.00088286
54820	NDE1	31047	0.00088553
94120	SYTL3	-31048	0.00088553
57192	MCOLN1	31044	0.00088643
84993	UBL7	31042	0.00088664
78994	PRR14	31039	0.00088715
64718	UNKL	31.04	0.00088715
3998	LMAN1	-31038	0.00088746
51329	ARL6IP4	31032	0.00088918
360203	GLT6D1	31027	0.00089079
2171	FABP5	31025	0.00089111
84460	ZMAT1	-31023	0.00089165
55615	PRR5	-31016	0.00089346
85012	TCEAL3	31016	0.00089346
5184	PEPD	31011	0.00089488
23682	RAB38	-31003	0.00089775
81875	ISG20L2	30993	0.00090083
221749	PXDC1	-30987	0.000903
7568	ZNF20	30986	0.00090307
2782	GNB1	30981	0.00090442
9802	DAZAP2	30973	0.00090728
1593	CYP27A1	30963	0.00091071
56061	UBFD1	-30961	0.0009112
1859	DYRK1A	-30955	0.00091287
5693	PSMB5	30954	0.00091289
83888	FGFBP2	30951	0.00091339
5529	PPP2R5E	30.95	0.00091339
9871	SEC24D	-30951	0.00091339
4067	LYN	-30946	0.00091484
1938	EEF2	30928	0.00092135
170370	FAM170B	30924	0.00092233
4893	NRAS	-30908	0.00092815
79001	VKORC1	30903	0.00092972
6844	VAMP2	30902	0.00092979
5733	PTGER3	-30894	0.00093241
819	CAMLG	30893	0.0009327
79982	DNAJB14	-30892	0.0009327
27233	SULT1C4	30883	0.0009358
79729	SH3D21	-30876	0.00093818
6184	RPN1	30873	0.00093908
64983	MRPL32	-30872	0.00093912
9380	GRHPR	30864	0.00094178
54806	AHI1	-30859	0.00094305
153733	CCDC112	30859	0.00094305
678	ZFP36L2	30854	0.00094458
1948	EFNB2	-30849	0.00094643
3672	ITGA1	-30838	0.00095013
51647	CIAO2B	30823	0.00095556
3939	LDHA	-30.82	0.0009564
11098	PRSS23	30.82	0.0009564
93107	KCNG4	30812	0.00095902
1513	CTSK	30803	0.00096245
55101	DMAC2	30.79	0.00096714
2004	ELK3	-30789	0.00096714
1522	CTSZ	30785	0.00096824
90313	TP53I13	30782	0.00096904
5618	PRLR	-30776	0.00097144
11258	DCTN3	30773	0.0009721
2624	GATA2	-30.77	0.00097319
64919	BCL11B	30767	0.00097405
196441	ZFC3H1	-30758	0.0009772
6874	TAF4	30744	0.00098237
442213	PTCHD4	30743	0.00098263
90843	TCEAL8	30.74	0.00098355
388567	ZNF749	-30736	0.00098444
5153	PDE1B	30733	0.00098549
414060	TBC1D3C	30732	0.00098563
55365	TMEM176A	30.73	0.00098615
51304	ZDHHC3	30.72	0.0009897
5204	PFDN5	30716	0.00099115
55505	NOP10	30.71	0.00099306
10605	PAIP1	-30709	0.00099306
146225	CMTM2	30708	0.00099327
6745	SSR1	30706	0.00099377
54187	NANS	-30703	0.00099472
22847	ZNF507	-30697	0.00099677
51776	MAP3K20	-30693	0.00099791
57333	RCN3	30692	0.000998
5372	PMM1	30689	0.00099889
151195	CCNYL1	-30685	0.0010001
84549	MAK16	-30683	0.0010008
51652	CHMP3	30677	0.0010027
3480	IGF1R	-30676	0.0010028
57337	SENP7	-30673	0.0010038
4650	MYO9B	30662	0.0010079
285193	DUSP28	30661	0.0010082
88745	RRP36	30.66	0.0010082
2783	GNB2	30659	0.0010083
4841	NONO	30653	0.0010102
6576	SLC25A1	30653	0.0010102
23409	SIRT4	30652	0.0010103
55084	SOBP	-30648	0.0010113
55296	TBC1D19	-30647	0.0010113
84324	SARNP	30638	0.001015
55125	CEP192	-30619	0.0010225
79084	WDR77	30.61	0.001026
84432	PROK1	30599	0.0010299
23461	ABCA5	-30594	0.0010318
10004	NAALADL1	30588	0.0010341
4524	MTHFR	30.56	0.0010455
10564	ARFGEF2	-30548	0.0010503
3693	ITGB5	30517	0.0010633
84769	MPV17L2	30515	0.0010639
114885	OSBPL11	30506	0.0010674
222611	ADGRF2	30505	0.0010675
3183	HNRNPC	-30502	0.0010683
9972	NUP153	-30.5	0.0010689
6614	SIGLEC1	30491	0.0010728
54531	MIER2	30.48	0.001077
4736	RPL10A	30479	0.0010771
6038	RNASE4	30476	0.0010782
29105	CFAP20	30469	0.0010809
127255	LRRIQ3	-30467	0.0010815
23203	PMPCA	30448	0.0010894
5422	POLA1	-30445	0.0010905
10892	MALT1	-30435	0.0010944
8263	F8A1	30428	0.001097
10445	MCRS1	30428	0.001097
81572	PDRG1	30423	0.0010989
3419	IDH3A	-30.41	0.0011042
10935	PRDX3	30408	0.001105
84269	CHCHD5	30405	0.0011057
55745	AP5M1	30399	0.0011079
54868	TMEM104	30398	0.001108
3815	KIT	30394	0.0011097
54814	QPCTL	30386	0.0011131
84911	ZNF382	-30383	0.0011138
121441	NEDD1	-30.38	0.0011141
728888	NPIPB11	30.38	0.0011141
9489	PGS1	-30381	0.0011141
7284	TUFM	30379	0.0011141
51005	AMDHD2	-30378	0.0011143
53615	MBD3	30374	0.0011157
26578	OSTF1	30362	0.0011208
55011	PIH1D1	30.36	0.0011212
54148	MRPL39	-30357	0.0011224
10193	RNF41	30354	0.0011234
11251	PTGDR2	30345	0.001127
55629	PNRC2	-30342	0.001128
8859	STK19	30341	0.0011281
22797	TFEC	-30339	0.0011287
387082	SUMO4	-30335	0.0011302
54832	VPS13C	-30325	0.0011345
23269	MGA	-30305	0.0011431
81892	SLIRP	30306	0.0011431
55466	DNAJA4	-30303	0.0011434
8731	RNMT	-30298	0.0011454
83953	FCAMR	30295	0.001146
65009	NDRG4	-30296	0.001146
8074	FGF23	30294	0.0011462
10620	ARID3B	30.29	0.0011473
1945	EFNA4	30289	0.0011473
8504	PEX3	-30.29	0.0011473
6003	RGS13	-30281	0.001151
84920	ALG10	-30.27	0.0011553
54536	EXOC6	-30271	0.0011553
93436	ARMC6	30262	0.0011587
695	BTK	30249	0.0011644
106478991	LINC00449	30244	0.0011663
11238	CA5B	30242	0.0011671
10856	RUVBL2	30236	0.0011696
139285	AMER1	-30234	0.0011699
10393	ANAPC10	-30223	0.0011747
154214	RNF217	30221	0.0011753
5238	PGM3	-30218	0.0011763
201973	PRIMPOL	-30217	0.0011765
728611	BMS1P10	30209	0.0011798
55905	RNF114	30209	0.0011798
79958	DENND1C	30206	0.0011808
3550	IK	30183	0.0011914
7556	ZNF10	-30177	0.0011938
4697	NDUFA4	30173	0.0011953
23601	CLEC5A	30171	0.0011959
85409	NKD2	-30162	0.0012003
79169	C1orf35	30159	0.0012013
10384	BTN3A3	-30158	0.0012015
9069	CLDN12	-30152	0.0012037
114803	MYSM1	-30148	0.0012054
26472	PPP1R14B	30144	0.0012069
2957	GTF2A1	-30132	0.0012126
23054	NCOA6	30128	0.0012135
151987	PPP4R2	-30129	0.0012135
115704	EVI5L	30126	0.0012142
4809	SNU13	30125	0.0012142
26608	TBL2	30125	0.0012142
54512	EXOSC4	30123	0.0012147
390883	OR7G3	30116	0.0012176
269	AMHR2	30106	0.0012219
5724	PTAFR	30105	0.0012219
259285	TAS2R39	-30105	0.0012219
27141	CIDEB	30.1	0.0012238
23463	ICMT	30098	0.0012241
7697	ZNF138	-30098	0.0012241
81602	CDADC1	-30095	0.001225
3596	IL13	-30092	0.0012266
79836	LONRF3	-30081	0.0012314
10898	CPSF4	30078	0.001232
57140	RNPEPL1	30079	0.001232
84803	GPAT3	30073	0.001234
84622	ZNF594	-30071	0.0012347
5989	RFX1	30.07	0.0012349
23569	PADI4	30058	0.0012405
54145	H2BS1	30051	0.0012437
8896	BUD31	30048	0.001245
4651	MYO10	-30041	0.0012482
23392	ECPAS	-30034	0.0012513
57514	ARHGAP31	-30017	0.0012592
9100	USP10	30017	0.0012592
64175	P3H1	30015	0.0012598
347454	SOWAHD	30008	0.0012629
10008	KCNE3	30004	0.0012646
823	CAPN1	29996	0.0012684
65062	TMEM237	-29991	0.0012701
79158	GNPTAB	-29.98	0.0012754
23784	POTEH	29.98	0.0012754
5357	PLS1	-29976	0.0012769
79176	FBXL15	29.97	0.0012795
54549	SDK2	-29961	0.0012837
80851	SH3BP5L	29959	0.0012845
93058	COQ10A	29958	0.0012846
57819	LSM 2,00	-29955	0.0012859
6888	TALDO1	29952	0.0012869
10509	SEMA4B	29951	0.0012871
23288	IQCE	29944	0.0012901
1740	DLG2	-29942	0.0012908
10376	TUBA1B	29.94	0.0012913
22809	ATF5	29938	0.0012924
170692	ADAMTS18	29935	0.0012934
147429	AQP4-AS1	29931	0.0012952
8802	SUCLG1	29928	0.001296
85457	CIPC	29917	0.0013015
3977	LIFR	29908	0.0013059
23412	COMMD3	29906	0.0013066
83636	C19orf12	-29896	0.0013112
55784	MCTP2	-29896	0.0013112
285313	IGSF10	-29877	0.0013211
2803	GOLGA4	-29874	0.001322
29071	C1GALT1C1	-29871	0.001323
51542	VPS54	-29871	0.001323
55016	MARCHF1	29.87	0.0013231
9956	HS3ST2	29865	0.0013253
285852	TREML4	-29863	0.0013259
5553	PRG2	-29858	0.0013281
89122	TRIM4	29846	0.001334
388121	TNFAIP8L3	29.84	0.0013369
728276	CLEC19A	29835	0.0013391
4036	LRP2	29834	0.0013394
400916	CHCHD10	29832	0.0013402
255101	CFAP65	29.83	0.0013406
137970	UNC5D	29829	0.001341
152485	ZNF827	-29822	0.0013442
8178	ELL	29.82	0.0013447
80306	MED28	-29819	0.0013451
9166	EBAG9	-29.81	0.0013496
22933	SIRT2	29802	0.0013536
4915	NTRK2	-29791	0.0013593
51569	UFM1	-29784	0.0013624
760	CA2	-29776	0.0013659
613037	NPIPB13	29776	0.0013659
81876	RAB1B	29769	0.0013698
162083	C16orf82	29.76	0.0013727
54103	GSAP	-29.76	0.0013727
5778	PTPN7	29.76	0.0013727
113402	SFT2D1	29761	0.0013727
64689	GORASP1	-29749	0.0013784
22920	KIFAP3	-29748	0.0013787
25822	DNAJB5	29741	0.0013815
9723	SEMA3E	29742	0.0013815
9182	RASSF9	29737	0.0013837
79078	C1orf50	29713	0.0013964
4201	MEA1	29.71	0.0013978
29988	SLC2A8	29709	0.001398
57459	GATAD2B	29708	0.0013983
3558	IL2	-29705	0.0013986
9540	TP53I3	29706	0.0013986
84225	ZMYND15	29692	0.0014061
6692	SPINT1	29.69	0.0014063
114790	STK11IP	29.69	0.0014063
10936	GPR75	-29673	0.0014152
85025	TMEM60	29673	0.0014152
83938	LRMDA	29663	0.0014204
2495	FTH1	-29662	0.0014205
84446	BRSK1	-29.66	0.0014213
79637	ARMC7	29654	0.0014241
60487	TRMT11	-29648	0.0014271
152002	XXYLT1	29645	0.0014284
7205	TRIP6	29643	0.0014292
339318	ZNF181	-29635	0.0014332
8844	KSR1	-29633	0.001434
79685	SAP30L	29628	0.0014366
51100	SH3GLB1	-29627	0.0014366
5990	RFX2	29621	0.0014398
4772	NFATC1	-29612	0.0014447
5305	PIP4K2A	29.59	0.0014568
643836	ZFP62	-29583	0.0014609
488	ATP2A2	-29579	0.0014625
5613	PRKX	-29572	0.0014661
191	AHCY	29.56	0.0014721
388722	C1orf53	29559	0.0014721
4828	NMB	-29559	0.0014721
54106	TLR9	29.56	0.0014721
2622	GAS8	-29558	0.0014724
143686	SESN3	-29557	0.0014727
55068	ENOX1	29553	0.0014741
338382	RAB7B	29553	0.0014741
151	ADRA2B	-29544	0.0014789
123036	TC2N	-29534	0.0014842
84636	GPR174	-29528	0.0014878
3217	HOXB7	29523	0.0014904
1638	DCT	-29517	0.001493
79153	GDPD3	29509	0.0014973
276	AMY1A	29505	0.0014991
80714	PBX4	-29505	0.0014991
6301	SARS1	29497	0.0015036
2335	FN1	29486	0.0015086
4257	MGST1	29487	0.0015086
6604	SMARCD3	29486	0.0015086
26191	PTPN22	29472	0.0015171
205717	USF3	-29.47	0.0015176
58504	ARHGAP22	29468	0.0015183
7750	ZMYM2	-29465	0.0015199
23295	MGRN1	29463	0.0015207
149603	RNF187	29453	0.001526
100132932	FAM197Y9	29435	0.0015371
152518	NFXL1	29423	0.0015437
8869	ST3GAL5	-29.42	0.0015453
79903	NAA60	29417	0.0015469
7040	TGFB1	29413	0.0015489
25963	TMEM87A	29407	0.0015518
399664	MEX3D	29393	0.0015607
7851	MALL	29387	0.0015639
27133	KCNH5	29386	0.001564
84436	ZNF528	-29384	0.0015644
90102	PHLDB2	-29383	0.0015645
57684	ZBTB26	-29383	0.0015645
94235	GNG8	-29381	0.0015653
2675	GFRA2	29374	0.0015691
25833	POU2F3	29364	0.0015746
55002	TMCO3	29356	0.0015795
120103	SLC36A4	29354	0.0015796
245711	SPDYA	-29355	0.0015796
84872	ZC3H10	29.35	0.0015822
83861	RSPH3	29346	0.001584
654	BMP6	-29339	0.0015882
54951	COMMD8	29334	0.0015908
63979	FIGNL1	-29324	0.0015968
6513	SLC2A1	29323	0.0015969
860	RUNX2	-29315	0.0016014
51585	PCF11	-29302	0.0016095
84649	DGAT2	29.3	0.0016104
23389	MED13L	-29294	0.0016134
1825	DSC3	29293	0.0016135
84321	THOC3	29293	0.0016135
66035	SLC2A11	29288	0.001616
283254	HARBI1	29262	0.0016327
253430	IPMK	-29254	0.0016371
8450	CUL4B	-29251	0.0016391
9354	UBE4A	29248	0.0016401
56925	LXN	-29247	0.0016403
50813	COPS7A	29239	0.0016457
60	ACTB	29.23	0.0016505
5030	P2RY4	-29.23	0.0016505
96626	LIMS3	-29221	0.0016561
161436	EML5	-29218	0.0016571
51230	PHF20	29215	0.0016587
959	CD40LG	29214	0.0016593
8667	EIF3H	29212	0.0016601
23059	CLUAP1	-29193	0.0016719
65250	CPLANE1	-29191	0.0016729
1979	EIF4EBP2	29.19	0.0016729
8898	MTMR2	-29.19	0.0016729
22866	CNKSR2	-29176	0.0016815
1053	CEBPE	29173	0.001683
55035	NOL8	-29172	0.0016835
26959	HBP1	-29169	0.0016849
51475	CABP2	29168	0.0016851
2877	GPX2	-29159	0.0016906
58155	PTBP2	-29158	0.0016906
163786	SASS6	-29157	0.0016912
9517	SPTLC2	-29143	0.0016997
55973	BCAP29	29.14	0.0017015
4745	NELL1	29139	0.0017015
9113	LATS1	-29133	0.0017053
3162	HMOX1	29126	0.0017094
4084	MXD1	-29123	0.0017109
494115	RBMXL1	-29122	0.0017109
64393	ZMAT3	29123	0.0017109
144455	E2F7	-29118	0.0017131
22827	PUF60	29114	0.0017151
23513	SCRIB	29114	0.0017151
4345	CD200	-29112	0.001716
56301	SLC7A10	29109	0.0017171
5094	PCBP2	29107	0.0017181
10563	CXCL13	-29098	0.0017242
1894	ECT2	29092	0.0017274
57685	CACHD1	-29091	0.001728
114789	SLC25A25	29071	0.0017415
105379268	FAM197Y8	29068	0.0017423
29925	GMPPB	29068	0.0017423
83891	SNX25	-29066	0.0017432
201294	UNC13D	29063	0.001745
10163	WASF2	29057	0.0017484
1122	CHML	-29045	0.0017567
121599	SPIC	29043	0.0017572
51009	DERL2	29.04	0.0017585
7403	KDM6A	-29039	0.0017589
9810	RNF40	29037	0.0017601
6059	ABCE1	-29031	0.0017638
6817	SULT1A1	29028	0.0017652
51686	OAZ3	29024	0.0017679
1803	DPP4	-29022	0.0017682
57410	SCYL1	29.02	0.0017693
3750	KCND1	-29007	0.0017777
59339	PLEKHA2	29007	0.0017777
79650	USB1	29002	0.0017807
2011	MARK2	28997	0.0017837
57447	NDRG2	28.99	0.001788
10457	GPNMB	28988	0.0017888
1230	CCR1	-28987	0.0017892
286006	LSMEM1	-28985	0.0017901
1874	E2F4	28984	0.0017902
6869	TACR1	-28982	0.001791
91978	TPGS1	28982	0.001791
92140	MTDH	28975	0.0017947
54807	ZNF586	28975	0.0017947
4763	NF1	-28.97	0.0017981
79165	LENG1	28968	0.0017987
60481	ELOVL5	-28964	0.0018003
285848	PNPLA1	-28964	0.0018003
57636	ARHGAP23	-28961	0.0018018
79411	GLB1L	28961	0.0018018
64757	MTARC1	28957	0.0018039
5495	PPM1B	28945	0.0018119
8625	RFXANK	28.94	0.0018155
6992	PPP1R11	28935	0.0018186
3423	IDS	28931	0.0018205
126432	RINL	28931	0.0018205
5172	SLC26A4	28928	0.0018216
83473	KATNAL2	-28919	0.0018276
54822	TRPM7	-28916	0.0018299
2676	GFRA3	28913	0.0018312
3632	INPP5A	-28911	0.0018319
4637	MYL6	28911	0.0018319
57669	EPB41L5	-28902	0.0018381
137868	SGCZ	28882	0.0018518
255394	TCP11L2	-28874	0.0018575
3015	H2AZ1	28872	0.0018584
27095	TRAPPC3	28871	0.0018584
9900	SV2A	28864	0.0018637
2992	GYG1	28855	0.0018694
9798	IST1	28854	0.0018694
202018	TAPT1	-28853	0.0018699
9209	LRRFIP2	-28852	0.0018702
8569	MKNK1	28851	0.0018706
55114	ARHGAP17	-28843	0.0018757
57181	SLC39A10	-28842	0.0018758
5154	PDGFA	-28831	0.0018838
6363	CCL19	-28828	0.0018859
27334	P2RY10	-28823	0.0018886
84433	CARD11	-28.82	0.0018903
79713	IGFLR1	28814	0.0018944
3716	JAK1	-28813	0.0018951
375704	ENHO	28802	0.0019023
347862	GATD1	28798	0.0019048
56650	CLDND1	-28794	0.0019075
9170	LPAR2	28792	0.0019089
53834	FGFRL1	28788	0.0019107
26502	NARF	-28782	0.0019154
112495	GTF3C6	28778	0.0019173
2662	GDF10	28774	0.0019203
53840	TRIM34	28766	0.0019257
96764	TGS1	-28765	0.0019259
10625	IVNS1ABP	-28.76	0.0019288
6753	SSTR3	-28.76	0.0019288
283635	FAM177A1	-28752	0.001934
56171	DNAH7	28751	0.0019342
55111	PLEKHJ1	28751	0.0019342
23033	DOP1A	-28741	0.0019415
8200	GDF5	28739	0.0019422
58487	CREBZF	-28729	0.0019492
5314	PKHD1	28729	0.0019492
148	ADRA1A	-28726	0.0019503
342918	C19orf81	28722	0.0019532
64327	LMBR1	-28717	0.0019569
8411	EEA1	-28713	0.0019577
3762	KCNJ5	28715	0.0019577
200185	KRTCAP2	28714	0.0019577
348110	ARPIN	28705	0.0019633
911	CD1C	28705	0.0019633
9185	REPS2	28693	0.0019717
55343	SLC35C1	28691	0.0019728
23446	SLC44A1	28691	0.0019728
2719	GPC3	-28689	0.0019736
9839	ZEB2	-28684	0.0019769
22927	HABP4	28681	0.0019786
56935	SMCO4	28676	0.0019824
256356	GK5	28673	0.0019842
143279	HECTD2	-28.67	0.0019856
112770	GLMP	28664	0.0019896
27020	NPTN	28653	0.0019979
3841	KPNA5	-28652	0.0019981
1643	DDB2	-28648	0.0020009
220136	CFAP53	-28644	0.0020032
6782	HSPA13	-28644	0.0020032
128308	MRPL55	28635	0.0020095
92999	ZBTB47	28631	0.0020121
11183	MAP4K5	-28.63	0.0020123
51076	CUTC	28613	0.0020256
10922	FASTK	28611	0.0020272
79644	SRD5A3	28609	0.0020282
4357	MPST	28608	0.0020285
3577	CXCR1	28603	0.0020314
10146	G3BP1	-28599	0.0020327
55668	GPATCH2L	-28.6	0.0020327
28966	SNX24	28601	0.0020327
375790	AGRN	-28591	0.0020387
83787	ARMC10	28.59	0.0020387
4708	NDUFB2	28591	0.0020387
5500	PPP1CB	-28584	0.0020428
83734	ATG10	-28583	0.002043
57649	PHF12	28.58	0.0020455
1404	HAPLN1	28577	0.0020472
4733	DRG1	28563	0.0020577
3422	IDI1	-28561	0.002059
89970	RSPRY1	28555	0.0020638
643988	FNDC10	28551	0.0020664
651746	ANKRD33B	-28547	0.0020686
2776	GNAQ	-28545	0.0020693
6432	SRSF7	-28546	0.0020693
23644	EDC4	28.54	0.0020724
128553	TSHZ2	-28.54	0.0020724
439996	IFIT1B	-28539	0.0020725
7003	TEAD1	-28507	0.0020986
10915	TCERG1	-28505	0.0021001
55611	OTUB1	28502	0.0021018
85480	TSLP	-28499	0.0021032
115265	DDIT4L	-28494	0.0021066
120379	PIH1D2	28495	0.0021066
5425	POLD2	28486	0.0021127
731605	BCLAF1P2	-28484	0.0021136
55805	LRP2BP	-28483	0.0021136
8715	NOL4	28483	0.0021136
4300	MLLT3	-28.48	0.0021158
22887	FOXJ3	28471	0.0021224
4711	NDUFB5	28466	0.0021263
55840	EAF2	-28465	0.0021265
11234	HPS5	-28464	0.0021267
6538	SLC6A11	28463	0.002127
10075	HUWE1	-28457	0.0021308
4241	MELTF	-28458	0.0021308
57472	CNOT6	28448	0.0021377
7849	PAX8	-28445	0.0021394
84305	PYM1	28443	0.002141
6767	ST13	28442	0.0021414
2268	FGR	28424	0.0021563
642633	FAM230B	28417	0.0021613
2352	FOLR3	28415	0.0021624
7832	BTG2	-28413	0.0021634
57683	ZDBF2	-28411	0.002165
2872	MKNK2	28.41	0.0021653
1525	CXADR	28403	0.0021696
1611	DAP	28404	0.0021696
285527	FRYL	-28.4	0.0021721
1308	COL17A1	-28395	0.0021754
84266	ALKBH7	28393	0.0021772
51522	TMEM14C	28377	0.0021903
91369	ANKRD40	-28374	0.0021924
196528	ARID2	-28373	0.0021924
6129	RPL7	28367	0.0021972
400224	PLEKHD1	28363	0.0022001
1583	CYP11A1	-28361	0.0022011
200576	PIKFYVE	-28.36	0.0022011
573	BAG1	-28358	0.0022026
6879	TAF7	-28351	0.0022082
1967	EIF2B1	28346	0.0022123
3028	HSD17B10	28344	0.0022126
55968	NSFL1C	28343	0.0022128
374882	TMEM205	28343	0.0022128
3007	H1-3	-28.34	0.0022147
51247	PAIP2	28.33	0.0022233
200186	CRTC2	28318	0.0022329
4669	NAGLU	28314	0.0022361
6249	CLIP1	-28308	0.0022405
51368	TEX264	28303	0.0022442
8559	PRPF18	-28301	0.0022458
1958	EGR1	-28299	0.0022467
257240	KLHL34	-28298	0.0022473
9145	SYNGR1	28296	0.0022484
201895	SMIM14	28294	0.0022492
2649	NR6A1	28287	0.0022556
7057	THBS1	-28283	0.002258
643866	CBLN3	-28278	0.0022616
140609	NEK7	-28276	0.0022633
2869	GRK5	-28267	0.002271
84668	FAM126A	-28266	0.0022713
201283	AMZ2P1	-28262	0.0022735
6263	RYR3	-28257	0.002278
728294	D2HGDH	-28256	0.0022785
814	CAMK4	-28244	0.0022882
246175	CNOT6L	-28237	0.0022933
55827	DCAF6	28238	0.0022933
2065	ERBB3	28235	0.0022945
144193	AMDHD1	28231	0.0022979
51282	SCAND1	28228	0.0022996
54532	USP53	-28226	0.0023008
153129	SLC38A9	28224	0.0023021
79717	PPCS	28215	0.0023095
441531	PGAM4	28213	0.0023109
5570	PKIB	28203	0.0023196
114088	TRIM9	-28193	0.0023289
5375	PMP2	28191	0.0023297
8797	TNFRSF10A	28189	0.0023308
1106	CHD2	-28188	0.002331
9252	RPS6KA5	-28182	0.0023361
2805	GOT1	28169	0.0023474
3726	JUNB	-28167	0.0023486
1301	COL11A1	28166	0.0023489
10042	HMGXB4	-28161	0.0023533
6561	SLC13A1	28155	0.0023585
955	ENTPD6	28154	0.0023588
54982	CLN6	28153	0.0023592
2069	EREG	-28148	0.0023625
55117	SLC6A15	28146	0.0023641
64109	CRLF2	-28139	0.00237
4008	LMO7	-28136	0.0023722
1487	CTBP1	28132	0.0023745
9967	THRAP3	-28132	0.0023745
116844	LRG1	28122	0.0023837
23239	PHLPP1	-28.12	0.0023847
302	ANXA2	-28116	0.0023877
270	AMPD1	28104	0.002399
4150	MAZ	28.1	0.0024019
92345	NAF1	-28095	0.0024063
30832	ZNF354C	-28.09	0.0024101
539	ATP5PO	28089	0.0024104
63915	BLOC1S5	28086	0.0024127
1386	ATF2	-28083	0.0024136
3663	IRF5	28082	0.0024136
3747	KCNC2	28083	0.0024136
51430	SUCO	-28082	0.0024136
354	KLK3	28077	0.0024177
389692	MAFA	-28076	0.0024178
64960	MRPS15	28076	0.0024178
10726	NUDC	28.07	0.0024226
9917	FAM20B	-28066	0.0024259
54680	ZNHIT6	-28064	0.0024271
3840	KPNA4	-28063	0.0024278
6533	SLC6A6	-28.06	0.0024296
57035	RSRP1	28059	0.0024297
51309	ARMCX1	-28056	0.0024313
4322	MMP13	28056	0.0024313
79581	SLC52A2	28051	0.0024345
85015	USP45	-28052	0.0024345
10929	SRSF8	28.05	0.0024349
11278	KLF12	-28048	0.0024361
219402	MTIF3	28044	0.00244
161176	SYNE3	-28038	0.0024448
9326	ZNHIT3	28031	0.0024507
89884	LHX4	-28025	0.002456
27349	MCAT	28021	0.0024595
55695	NSUN5	28019	0.0024613
128178	EDARADD	-28017	0.0024622
51596	CUTA	28013	0.0024651
4739	NEDD9	-28006	0.0024711
9821	RB1CC1	-28005	0.002472
64089	SNX16	-28003	0.002473
84418	CYSTM1	-27994	0.0024807
6748	SSR4	27994	0.0024807
338811	TAFA2	-27983	0.0024905
359845	RFLNB	27981	0.0024924
8608	RDH16	-27974	0.002498
55619	DOCK10	-27974	0.0024981
23583	SMUG1	27.97	0.0025008
56950	SMYD2	27959	0.0025113
125061	AFMID	27957	0.0025118
5805	PTS	-27957	0.0025118
25847	ANAPC13	27955	0.0025136
221895	JAZF1	-27953	0.0025149
83639	TEX101	27.95	0.0025168
8239	USP9X	-27.95	0.0025168
3985	LIMK2	-27945	0.0025204
5211	PFKL	27937	0.0025283
90379	DCAF15	27936	0.0025287
50484	RRM2B	27935	0.002529
545	ATR	-27927	0.0025362
11317	RBPJL	27926	0.0025362
4921	DDR2	-27924	0.0025371
3375	IAPP	27923	0.0025383
92002	CCNQ	27917	0.0025436
128989	TANGO2	27913	0.0025471
90	ACVR1	-27903	0.0025544
50617	ATP6V0A4	27903	0.0025544
51780	KDM3B	27904	0.0025544
10244	RABEPK	27901	0.002556
64145	RBSN	27899	0.0025571
541565	C8orf58	27897	0.0025584
23473	CAPN7	-27894	0.0025614
6234	RPS28	27891	0.0025633
92597	MOB1B	-27884	0.0025691
10956	OS9	27884	0.0025691
641372	ACOT6	27.88	0.0025731
55640	FLVCR2	27876	0.002576
2734	GLG1	27866	0.0025856
440955	TMEM89	27865	0.0025861
132720	FAM241A	-27861	0.0025896
84444	DOT1L	-27.86	0.0025902
353299	RGSL1	27856	0.0025929
2539	G6PD	27846	0.0026029
675	BRCA2	-27831	0.0026175
8826	IQGAP1	27.83	0.0026182
163486	DENND1B	27828	0.0026192
861	RUNX1	-27825	0.0026215
51643	TMBIM4	27822	0.0026241
51614	ERGIC3	27812	0.0026339
25959	KANK2	27809	0.0026361
84343	HPS3	27802	0.0026432
6209	RPS15	27801	0.0026432
401093	MBNL1-AS1	-27797	0.0026468
6428	SRSF3	-27795	0.0026487
100316904	SAP25	27792	0.0026511
339345	NANOS2	27789	0.0026536
56605	ERO1B	-27784	0.0026566
25942	SIN3A	-27784	0.0026566
93081	TEX30	-27784	0.0026566
9114	ATP6V0D1	27.78	0.0026589
55140	ELP3	27.78	0.0026589
284023	RNF227	27778	0.0026598
6821	SUOX	27778	0.0026598
83933	HDAC10	27777	0.0026601
134492	NUDCD2	-27774	0.002662
157680	VPS13B	-27774	0.002662
5723	PSPH	27768	0.0026672
25978	CHMP2B	-27762	0.0026728
221908	PPP1R35	27757	0.0026782
25938	HEATR5A	27747	0.0026845
3707	ITPKB	27749	0.0026845
5251	PHEX	-27747	0.0026845
9491	PSMF1	27747	0.0026845
55684	RABL6	27749	0.0026845
84231	TRAF7	27748	0.0026845
4297	KMT2A	-27741	0.0026893
145741	C2CD4A	-27739	0.0026916
112724	RDH13	27737	0.0026922
6261	RYR1	27735	0.0026938
6646	SOAT1	-27731	0.002698
2218	FKTN	-27724	0.0027045
165082	ADGRF3	-27711	0.0027159
160	AP2A1	27711	0.0027159
821	CANX	27712	0.0027159
22908	SACM1L	27705	0.002722
2160	F11	27701	0.0027253
129303	TMEM150A	27696	0.0027302
9694	EMC2	-27692	0.0027333
23387	SIK3	27.69	0.002735
55892	MYNN	-27689	0.0027356
26009	ZZZ3	-27685	0.0027388
144766	LINC00355	27678	0.0027457
128372	OR6N1	27677	0.002746
60561	RINT1	-27675	0.0027481
9514	GAL3ST1	27656	0.0027682
29969	MDFIC	-27655	0.0027685
54461	FBXW5	27653	0.0027695
9685	CLINT1	27.65	0.002772
10804	GJB6	-27631	0.0027928
54542	RC3H2	-27.63	0.0027935
159162	RBMY2FP	27626	0.0027964
222967	RSPH10B	27626	0.0027964
11100	HNRNPUL1	27615	0.0028068
55161	TMEM33	27615	0.0028068
55704	CCDC88A	27614	0.0028077
2744	GLS	-27611	0.00281
1978	EIF4EBP1	27609	0.0028116
56731	SLC2A4RG	27607	0.0028127
92579	G6PC3	27583	0.0028388
9080	CLDN9	27572	0.0028513
140459	ASB6	27.57	0.0028527
64863	METTL4	-27569	0.0028533
23317	DNAJC13	-27567	0.0028539
57573	ZNF471	-27563	0.0028579
84775	ZNF607	-27562	0.0028581
4919	ROR1	-27561	0.0028592
9737	GPRASP1	-27552	0.0028682
5190	PEX6	27545	0.0028755
643689	HNRNPA3P3	27541	0.0028793
10512	SEMA3C	-27536	0.0028838
5438	POLR2I	27534	0.0028859
5763	PTMS	-27523	0.002898
54845	ESRP1	27516	0.0029037
23507	LRRC8B	-27516	0.0029037
5780	PTPN9	27517	0.0029037
148223	C19orf25	27511	0.0029085
57462	MYORG	-27508	0.002911
55954	ZMAT5	27504	0.0029154
51267	CLEC1A	-27493	0.0029276
3709	ITPR2	-27489	0.0029315
3202	HOXA5	-27484	0.0029357
161	AP2A2	27483	0.0029363
283432	LINC00485	27481	0.0029363
4259	MGST3	27482	0.0029363
390980	ZNF805	-27481	0.0029363
528	ATP6V1C1	-27476	0.0029414
714	C1QC	27472	0.0029457
65061	CDK15	27466	0.0029513
23032	USP33	-27462	0.0029559
6309	SC5D	-27458	0.0029591
11182	SLC2A6	-27458	0.0029591
51676	ASB2	27455	0.0029609
54899	PXK	27.45	0.0029665
6671	SP4	-27442	0.0029745
55814	BDP1	-27439	0.002977
6147	RPL23A	27439	0.002977
1603	DAD1	27.43	0.0029874
25977	NECAP1	-27422	0.0029961
56155	TEX14	-27415	0.0030028
3313	HSPA9	-27411	0.0030072
1376	CPT2	27409	0.0030081
57210	SLC45A4	-27409	0.0030081
23443	SLC35A3	-27405	0.0030116
538	ATP7A	-27398	0.0030199
4090	SMAD5	27397	0.0030202
10969	EBNA1BP2	27391	0.0030255
27439	TMEM121B	27392	0.0030255
388536	ZNF790	-27378	0.0030408
3240	HP	27376	0.0030423
9568	GABBR2	27375	0.0030428
84572	GNPTG	27373	0.0030442
124925	SEZ6	-27369	0.0030476
257364	SNX33	-27358	0.0030603
1586	CYP17A1	27356	0.0030617
9623	TCL1B	-27355	0.0030628
103910	MYL12B	27345	0.0030744
25766	PRPF40B	-27.34	0.0030797
150368	PHETA2	27334	0.0030855
7695	ZNF136	-27334	0.0030855
5873	RAB27A	-27331	0.0030876
57154	SMURF1	-27321	0.0030993
136	ADORA2B	-27313	0.0031078
390530	IGHV1OR21-1	27312	0.0031078
387893	KMT5A	27314	0.0031078
10327	AKR1A1	27307	0.003113
388135	INSYN1	27307	0.003113
440822	PIWIL3	27303	0.0031165
24	ABCA4	27299	0.0031209
51320	MEX3C	-27297	0.0031226
10815	CPLX1	-27296	0.003123
8323	FZD6	-27293	0.003125
9883	POM121	27293	0.003125
56204	FAM214A	-27.29	0.0031277
100271927	RASA4B	27281	0.0031381
64374	SIL1	27272	0.0031487
23325	WASHC4	-27.27	0.0031501
8867	SYNJ1	27264	0.0031567
55529	PIP4P2	27258	0.0031639
5715	PSMD9	27256	0.0031653
145407	ARMH4	27254	0.0031665
105373010	LINC01643	-27248	0.0031733
752	FMNL1	27245	0.0031766
57691	KIAA1586	-27243	0.003178
10594	PRPF8	27241	0.0031798
8690	JRKL	-27238	0.003183
9988	DMTF1	-27234	0.0031871
26574	AATF	27.23	0.0031897
79890	RIN3	27.23	0.0031897
10045	SH2D3A	-27231	0.0031897
1879	EBF1	-27221	0.0031996
345757	FAM174A	27221	0.0031996
89790	SIGLEC10	27217	0.0032033
79646	PANK3	-27212	0.0032087
7752	ZNF200	-27212	0.0032087
4671	NAIP	27208	0.0032123
84299	MIEN1	27206	0.0032145
340526	RTL5	27205	0.0032145
9880	ZBTB39	-27196	0.0032252
1060	CENPC	-27192	0.0032303
653489	RGPD3	27185	0.0032376
1456	CSNK1G3	-27182	0.0032404
10214	SSX3	27181	0.0032414
1520	CTSS	27175	0.0032485
343069	HNRNPCL1	27174	0.0032487
23335	WDR7	-27161	0.0032652
4892	NRAP	27158	0.0032676
387119	CEP85L	-27149	0.0032782
7204	TRIO	-27134	0.003297
55635	DEPDC1	-27132	0.0032996
10673	TNFSF13B	-27121	0.0033125
7994	KAT6A	-27112	0.0033241
3705	ITPK1	27.11	0.0033252
57171	DOLPP1	27107	0.0033279
84681	HINT2	27102	0.003334
84062	DTNBP1	-27101	0.0033352
694	BTG1	-27099	0.003336
84937	ZNRF1	-27091	0.003346
205564	SENP5	-27087	0.0033512
57096	RPGRIP1	27083	0.003355
460	ASTN1	27081	0.0033574
114904	C1QTNF6	-27076	0.0033625
9662	CEP135	-27075	0.0033625
3248	HPGD	-27075	0.0033625
10369	CACNG2	27074	0.003363
79663	HSPBAP1	27072	0.0033639
51602	NOP58	-27.07	0.0033668
121053	C12orf45	27068	0.0033682
11018	TMED1	27067	0.0033687
54344	DPM3	27062	0.0033736
127623	OR2B11	-27062	0.0033736
4885	NPTX2	-27061	0.0033741
643582	AKR1B10P2	27059	0.0033752
153241	CEP120	-27058	0.0033755
4323	MMP14	-27057	0.0033768
79002	TRIR	27056	0.003377
10142	AKAP9	-27.05	0.003384
84814	PLPP7	27048	0.0033851
27156	RSPH14	27048	0.0033851
653641	GOLGA6C	27044	0.0033892
10205	MPZL2	27042	0.0033909
64222	TOR3A	-27032	0.0034036
164656	TMPRSS6	-27.03	0.0034061
390190	OR5B2	-27025	0.0034119
58	ACTA1	27023	0.003413
80333	KCNIP4	-27022	0.0034145
57533	TBC1D14	-27.02	0.0034161
8449	DHX16	27018	0.0034173
168391	GALNTL5	27012	0.0034244
9699	RIMS2	27.01	0.003427
5991	RFX3	-27003	0.0034354
29086	BABAM1	27001	0.0034375
283316	CD163L1	26999	0.0034376
153830	RNF145	-27	0.0034376
7764	ZNF217	-26994	0.0034436
741	ZNHIT2	26994	0.0034436
377	ARF3	26986	0.0034536
642938	INSYN2A	-26983	0.0034567
91252	SLC39A13	26.98	0.0034599
[truncated: 6,264 more rows]

## Sheet: Table S4
Supplementary Table S4. log2FC and adjusted p-value of 44 genes in common between the WBCs (GSE65088, GSE114179) and PBMCs (GSE42606, GSE154911) datasets.
log2FC						adjusted p-value (-log10)
ID	GSE42606	GSE154911	GSE65088	GSE114180		ID	GSE42606	GSE159411	GSE65088	GSE114180
ASGR1	-1.05315	-2.7174	-1.04287	-2.9834		ASGR1	8.00174	3.08081	1.97062	9.39287
BATF	2.13374	3.2343	1.29519	1.0738		BATF	24.6271	3.56027	4.14752	3.05795
BHLHE40	1.18825	2.8634	1.84504	1.7039		BHLHE40	10.644	14.0137	4.86967	9.9141
C1orf162	-1.43209	-1.7055	-1.45276	-2.3033		C1orf162	21.2916	2.53285	6.18776	12.545
CD69	2.42863	2.7482	2.00249	3.8621		CD69	16.2573	3.59688	13.8153	19.5767
CSF1R	-2.00056	-3.6531	-1.59237	-3.0913		CSF1R	13.7011	4.20066	6.13077	23.2487
CXCL1	3.18543	3.0715	1.77278	1.1611		CXCL1	13.699	2.81228	1.56543	2.57128
CXCL5	2.47527	3.1755	1.11866	1.3057		CXCL5	9.88606	2.9772	1.85078	2.55955
CXCL8	2.63213	3.5068	1.7461	3.992		CXCL8	13.3925	4.09098	4.18046	50.6384
DDX60L	1.6598	1.8375	1.4693	1.2587		DDX60L	18.109	3.76947	2.65365	3.91154
DUSP5	1.89207	2.9152	1.81278	1.2876		DUSP5	15.2882	18.6421	5.85699	6.01131
EDN1	2.15134	3.2781	4.38301	3.4046		EDN1	15.52	4.31695	11.2708	13.9127
EIF2AK2	2.80236	1.304	1.72956	2.6361		EIF2AK2	28.3645	3.81784	5.92082	21.4126
EPSTI1	2.40901	1.2286	1.36317	1.9477		EPSTI1	18.3947	4.2636	1.65758	7.99426
ETS2	1.52142	1.1054	1.90891	2.2549		ETS2	16.7235	2.11135	6.11577	16.4578
FNIP2	1.1446	-1.176	1.19276	3.7653		FNIP2	13.3487	2.62224	10.618	44.0666
GADD45B	1.92814	1.3887	3.72886	2.7199		GADD45B	15.6108	5.70115	11.2604	21.9954
HELZ2	3.15858	2.3164	1.32426	1.8138		HELZ2	24.1308	10.3188	4.62893	12.2601
HERC6	3.16762	1.7492	1.2632	2.6964		HERC6	23.6459	3.41328	4.08725	19.3206
ID2	1.17632	1.4514	1.33067	1.464		ID2	12.2487	5.9393	2.767	4.69362
IFI44L	3.44111	2.3516	1.57472	3.3756		IFI44L	25.8861	1.88874	1.48545	15.8232
IFIT1	4.87521	1.8397	2.31677	2.329		IFIT1	24.6946	3.26981	2.28067	3.00003
IFIT3	4.22198	1.1652	2.53306	1.6358		IFIT3	24.3893	2.62344	3.19654	1.59638
IFNG	5.54022	2.6953	1.44194	3.6214		IFNG	30.9172	1.88045	4.92812	8.51787
IL6	5.35702	4.2727	3.74643	7.363		IL6	19.4056	5.6925	9.28904	61.9756
ISG15	4.32009	1.1217	2.46958	1.3091		ISG15	25.4522	1.83416	3.83565	2.79964
LAMP3	1.69715	2.2381	1.3767	3.1263		LAMP3	20.8996	4.91009	4.51428	12.2553
MAFF	1.62994	2.2633	2.30126	1.9314		MAFF	13.4134	9.51713	6.43063	15.0207
MX1	4.16127	2.1223	1.82818	2.0616		MX1	27.8861	9.01728	5.85699	5.59024
OAS3	1.13032	1.4459	1.48597	2.9498		OAS3	11.8153	2.82353	3.46852	15.7702
PIM1	1.50278	1.2827	1.63659	1.1867		PIM1	12.0991	2.66999	5.05552	3.81116
PLAUR	1.15447	2.2471	1.85214	1.171		PLAUR	5.35655	9.14327	4.81531	4.80228
PPP1R15A	1.20514	1.8508	2.05277	2.3857		PPP1R15A	7.6038	5.47237	3.92445	26.067
RIN2	2.58176	-4.5419	1.10618	2.1288		RIN2	15.3585	30.067	2.49349	8.62725
RNF213	1.71588	1.1534	1.17499	1.5483		RNF213	14.8794	4.49757	4.21042	11.6291
RSAD2	3.6403	2.3417	3.53558	4.0904		RSAD2	30.8041	12.7235	6.18642	22.3647
RTP4	1.96606	1.7132	1.15594	2.2698		RTP4	25.0372	2.28412	5.32331	7.10068
SAMD9L	2.69553	1.8014	1.4204	2.8536		SAMD9L	25.5834	7.36856	4.62709	18.8536
SGPP2	1.24088	2.802	1.03846	2.2283		SGPP2	10.7011	2.62628	1.91364	12.4834
SOCS1	1.89614	3.0416	1.3054	1.5894		SOCS1	23.8297	13.8041	4.87943	5.44005
SPP1	1.48257	2.0719	2.72694	2.2876		SPP1	10.4342	3.29594	1.95468	26.1803
USP18	1.85435	1.7825	1.48781	3.2071		USP18	20.0904	1.80872	6.61439	14.0954
VCAN	-2.20443	-3.1757	-2.15893	-3.1084		VCAN	12.0501	8.70333	4.84164	11.1472
ZC3H12A	1.12405	1.5078	1.54949	1.1443		ZC3H12A	12.9393	4.61261	1.81816	6.40477

## Sheet: Table S5
Supplementary Table S5. Enrichment generated by EnrichR (ref. BioPlanet) of 44 genes in common between WBCs (GSE65088, GSE114179) and PBMCs (GSE42606, GSE154911) datasets.
Term	Adjusted P-value	Genes
Interferon alpha/beta signaling	1.17428e+07	SOCS1;OAS3;MX1;ISG15;IFIT1;USP18;IFIT3
Interferon signaling	1.17428e+07	SOCS1;IFNG;OAS3;MX1;EIF2AK2;ISG15;IFIT1;USP18;IFIT3
Immune system signaling by interferons, interleukins, prolactin, and growth hormones	3.40167e+08	IL6;SOCS1;IFNG;OAS3;MX1;EIF2AK2;ISG15;IFIT1;USP18;IFIT3
Interleukin-5 regulation of apoptosis	5.36746e+08	DUSP5;IL6;CXCL8;SOCS1;ID2;PIM1;CXCL1;CD69
Cytokines and inflammatory response	2.57753e+09	IL6;CXCL8;IFNG;CXCL1
Interleukin-2 signaling pathway	1.00242e+10	DUSP5;CXCL8;MX1;PLAUR;IFIT1;ETS2;IL6;SOCS1;IFNG;ID2;BHLHE40;PIM1;CD69
Oncostatin M	1.23507e+10	EDN1;IL6;CXCL8;SOCS1;PLAUR;CXCL1;ETS2;CXCL5
T cell receptor regulation of apoptosis	1.60003e+10	CSF1R;DUSP5;IL6;CXCL8;GADD45B;IFNG;MX1;PIM1;ETS2;CXCL5
Thymic stromal lymphopoietin (TSLP) pathway	3.60078e+10	IL6;CXCL8;LAMP3;CXCL1;CXCL5
TGF-beta regulation of extracellular matrix	6.16265e+10	EDN1;VCAN;IL6;ID2;PIM1;CXCL1;IFIT1;ETS2;IFIT3
Type II interferon signaling (interferon-gamma)	7.37889e+10	SOCS1;IFNG;EIF2AK2;ISG15
Leptin influence on immune response	7.37889e+10	EDN1;IL6;IFNG;CXCL1;BATF
Interleukin-1 regulation of extracellular matrix	1.02027e+11	IL6;CXCL8;IFNG;SPP1;CXCL1;CXCL5
Antiviral mechanism by interferon-stimulated genes	1.40851e+11	MX1;EIF2AK2;ISG15;IFIT1;USP18
AP-1 transcription factor network	2.37111e+11	EDN1;IL6;CXCL8;IFNG
BDNF signaling pathway	2.90336e+11	DUSP5;VCAN;IL6;ID2;MAFF;SPP1
TWEAK regulation of gene expression	3.38715e+11	IL6;CXCL8;SPP1
Interleukin-4 regulation of apoptosis	3.71547e+11	VCAN;IL6;CXCL8;GADD45B;RSAD2;MX1;SPP1
Immune system	5.55755e+11	IL6;SOCS1;IFNG;OAS3;MX1;EIF2AK2;ISG15;IFIT1;USP18;IFIT3
Interleukin-7 interactions in immune response	6.25927e+11	CXCL8;CXCL1;CXCL5
Interleukin-23-mediated signaling events	6.91251e+11	IL6;IFNG;CXCL1
Jak-STAT signaling pathway	6.91251e+11	IL6;CXCL8;SOCS1;IFNG;PIM1
Senescence and autophagy	6.91251e+11	IL6;CXCL8;IFNG;CXCL1
FRA pathway	6.91251e+11	IL6;CXCL8;PLAUR
Amoebiasis	7.51467e+11	IL6;CXCL8;IFNG;CXCL1
ATF2 transcription factor network	1.34757e+12	DUSP5;IL6;CXCL8;IFNG
RAGE pathway	1.35672e+12	EDN1;IL6;CXCL8;ID2
Cytokine-cytokine receptor interaction	3.0047e+12	CSF1R;IL6;CXCL8;IFNG;CXCL1;CXCL5
Malaria	0.0016831318728399182	IL6;CXCL8;IFNG
TNF-alpha effects on cytokine activity, cell motility, and apoptosis	0.0018507713533641639	IL6;CXCL8;CXCL1;CD69
Binding of chemokines to chemokine receptors	0.0018667794239487626	CXCL8;CXCL1;CXCL5
Toll-like receptor signaling pathway regulation	0.002105037231260819	IL6;CXCL8;SOCS1;SPP1
Interleukin-12-mediated signaling events	0.0030365338541161048	SOCS1;GADD45B;IFNG
HIF-1 transcriptional activity in hypoxia	0.003071714064897215	EDN1;ID2;BHLHE40
Interferon gamma signaling regulation	0.003071714064897215	SOCS1;IFNG
Interleukin-17 signaling pathway	0.0032599136276586956	IL6;CXCL8
Adhesion and diapedesis of granulocytes	0.0032599136276586956	CXCL8;IFNG
Hematopoiesis regulation by cytokines	0.0032599136276586956	IL6;CXCL8
Cells and molecules involved in local acute inflammatory response	0.004102614812376814	IL6;CXCL8
Effect of METS on macrophage differentiation	0.004492699462031859	CSF1R;ETS2
Nuclear beta-catenin signaling and target gene transcription regulation	0.004492699462031859	VCAN;CXCL8;ID2
Regular glucocorticoid receptor pathway	0.004712912134359449	IL6;CXCL8;IFNG
NOD signaling pathway	0.004736109037886437	IL6;CXCL8;CXCL1
Peptide G-protein coupled receptors	0.004736109037886437	EDN1;CXCL8;CXCL1;CXCL5
C-Myb transcription factor network	0.004736109037886437	CSF1R;PIM1;ETS2
ID regulation of gene expression	0.004736109037886437	CXCL8;CXCL1
Interleukin-3 regulation of hematopoietic cells	0.004736109037886437	CXCL8;CD69
Interferon-gamma signaling pathway	0.006572831747550093	SOCS1;IFNG;OAS3
TSH regulation of gene expression	0.006572831747550093	PPP1R15A;CXCL8;GADD45B
Interferon alpha signaling regulation	0.006980465295407941	SOCS1;USP18
Interleukin-27-mediated signaling events	0.00740354901419702	IL6;IFNG
Chagas disease	0.0075683493324078515	IL6;CXCL8;IFNG
Adipogenesis	0.014873669885420398	IL6;SOCS1;GADD45B
BMAL1-CLOCK/NPAS2 activates circadian expression	0.014873669885420398	HELZ2;BHLHE40
p53 signaling pathway	0.016314634515476056	DUSP5;VCAN;SPP1
Alpha-M beta-2 integrin signaling	0.01636740458183659	IL6;PLAUR
Graft-versus-host disease	0.01636740458183659	IL6;IFNG
Signaling events mediated by T cell protein tyrosine phosphatase (TC-PTP)	0.016865953235376173	CSF1R;EIF2AK2
Beta-3 integrin cell surface interactions	0.01736466734107575	SPP1;PLAUR
Interleukin-3 signaling pathway	0.0186683060188631	CXCL8;CD69
Myometrial relaxation and contraction pathways	0.0196718652691496	IL6;MAFF;ETS2
Regulation of NFAT transcription factors	0.0196718652691496	CXCL8;IFNG
Vitamin B12 metabolism	0.023582638626586515	IL6;IFNG
SHP2 signaling	0.027747401659879666	IL6;IFNG
Selenium pathway	0.030047370387404813	IL6;IFNG
TGF-beta signaling pathway	0.030047370387404813	PPP1R15A;IFNG;SPP1
FGF signaling pathway	0.030222557210069487	SPP1;PLAUR
Circadian rhythm	0.030470658492273945	HELZ2;BHLHE40
Chemokine signaling pathway	0.030470658492273945	CXCL8;CXCL1;CXCL5
Folate metabolism	0.030785938109395904	IL6;IFNG
LPA receptor mediated events	0.03223641838730964	IL6;CXCL8
Beta-1 integrin cell surface interactions	0.03273659686319007	SPP1;PLAUR
G alpha (i) signaling events	0.03278632740449796	CXCL8;CXCL1;CXCL5
SIDS susceptibility pathways	0.03278632740449796	IL6;CXCL8
Epithelial cell signaling in Helicobacter pylori infection	0.03328321795763078	CXCL8;CXCL1
RIG-I-like receptor signaling pathway	0.03568103808876444	CXCL8;ISG15
Integrins in angiogenesis	0.03811984636999176	CSF1R;SPP1
GPCR ligand binding	0.04032355483122918	EDN1;CXCL8;CXCL1;CXCL5
Influenza factor interactions with host	0.04168497045150692	EIF2AK2
Low-density lipoprotein (LDL) pathway during atherogenesis	0.04168497045150692	IL6
TGF-beta regulation of skeletal system development	0.046596273209834844	IFNG;ID2
Myc active pathway	0.046596273209834844	ID2;PIM1
Attachment of GPI anchor to uPAR	0.046824382701949156	PLAUR
Hematopoietic cell lineage	0.048571968708986134	CSF1R;IL6
Proepithelin conversion to epithelin and wound repair control	0.05159143835908029	CXCL8
Dissolution of fibrin clot	0.05159143835908029	PLAUR
Free radical-induced apoptosis	0.06288857740920537	CXCL8
Dermatan sulfate biosynthesis	0.06288857740920537	VCAN
Bone mineralization regulation	0.06682517483027381	SPP1
eIF2 regulation	0.06682517483027381	EIF2AK2
Osteopontin signaling	0.06682517483027381	SPP1
CBL-mediated ligand-induced downregulation of EGF receptors	0.07629102641191056	CSF1R
Chondroitin sulfate/dermatan sulfate degradation	0.07629102641191056	VCAN
Double stranded RNA-induced gene expression	0.07629102641191056	EIF2AK2
Adhesion and diapedesis of lymphocytes	0.08120769338022414	CXCL8
Interleukin-1 signaling pathway	0.08176026577035415	IL6;CXCL8
Arf6 vesicle-mediated transport	0.0842544516989722	PLAUR
Erythrocyte differentiation pathway	0.0842544516989722	IL6
Pathways in cancer	0.08541723413794874	CSF1R;IL6;CXCL8
Hypoxia-inducible factor in the cardivascular system	0.08541723413794874	EDN1
Inhibitor of DNA binding (ID) signaling pathway	0.08541723413794874	ID2
Interleukin-10 anti-inflammatory signaling pathway	0.08541723413794874	IL6
KIT signaling regulation	0.08541723413794874	SOCS1
Integrin beta-5 pathway	0.08646157282327618	PLAUR
Syndecan 3 pathway	0.08646157282327618	CXCL8
Dendritic cells in regulating TH1 and TH2 development	0.08646157282327618	IFNG
NO2-dependent IL-12 pathway in NK cells	0.08646157282327618	IFNG
Osteoclast signaling	0.08646157282327618	SPP1
Bone remodeling	0.09061066930583915	EIF2AK2
STAT3 pathway	0.09382087225157475	IL6
Tob role in T-cell activation	0.09382087225157475	IFNG
4-1BB-dependent immune response	0.09522185995756317	IFNG
Hypertrophy pathway	0.09522185995756317	IFNG
Cell differentiation pathway	0.09522185995756317	ID2
Chondroitin sulfate biosynthesis	0.09522185995756317	VCAN
EGFR1 pathway	0.0965461820257243	SPP1;PLAUR
Oxidative stress-induced gene expression via Nrf2	0.09816885988746642	MAFF
Epstein-Barr virus LMP1 signaling	0.10186311338219799	CXCL8
Modulation of interferon signaling by chaperones	0.10460657191316301	IFNG
Th1/Th2 differentiation pathway	0.10460657191316301	IFNG
Dorso-ventral axis formation	0.10635142383488168	ETS2
Endogenous Toll-like receptor signaling	0.10635142383488168	VCAN
Protein processing in the endoplasmic reticulum	0.10635142383488168	PPP1R15A;EIF2AK2
Ghrelin pathway	0.10635142383488168	CXCL8
Alpha-9 beta-1 integrin pathway	0.10635142383488168	SPP1
Corticotropin releasing hormone pathway	0.10635142383488168	CXCL8
Physiological and pathological hypertrophy of the heart	0.10635142383488168	EDN1
Selective expression of chemokine receptors during T-cell polarization	0.10635142383488168	IFNG
Interleukin-9 regulation of target genes	0.10635142383488168	PIM1
Tetrasaccharide linker sequence formation in glycosaminoglycan biosynthesis	0.10635142383488168	VCAN
ERBB2 role in signal transduction and oncology	0.10635142383488168	IL6
YAP1- and WWTR1 (TAZ)-stimulated gene expression	0.10635142383488168	HELZ2
Fibroblast growth factor 1	0.10635142383488168	PLAUR
RORA activates circadian expression	0.10950079574163397	HELZ2
TGF-beta receptor activation of SMADs	0.11176717934457941	PPP1R15A
PERK-regulated gene expression	0.11176717934457941	CXCL8
Post-translational modification: biosynthesis of GPI-anchored proteins	0.11313979166749559	PLAUR
Integrin beta-2 pathway	0.11313979166749559	PLAUR
T cell receptor calcium pathway	0.11313979166749559	IFNG
Inactivation of GSK3 by Akt causes accumulation of beta-catenin in alveolar macrophages	0.11444642938117149	EIF2AK2
Inflammatory response pathway	0.11444642938117149	IFNG
MicroRNAs in muscle cell differentiation	0.11444642938117149	ID2
Prostaglandin biosynthesis and regulation	0.1156912038857891	EDN1
Alpha-V beta-3 integrin/OPN pathway	0.1156912038857891	SPP1
NF-kappaB activation by non-typeable Hemophilus influenzae	0.1156912038857891	CXCL8
Sphingolipid de novo biosynthesis	0.1184789601838739	SGPP2
Syndecan 2 pathway	0.12040206902661417	CXCL8
Negative regulators of RIG-I/MDA5 signaling	0.12040206902661417	ISG15
HIF-2-alpha transcription factor network	0.12145669549955761	BHLHE40
EGF receptor transactivation by GPCRs in cardiac hypertrophy	0.12145669549955761	EDN1
EPO receptor signaling	0.12145669549955761	SOCS1
Prion diseases	0.12326336574084336	IL6
Autophagy regulation	0.12326336574084336	IFNG
GM-CSF-mediated signaling events	0.1258279895220778	PIM1
Allograft rejection	0.12835232037876068	IFNG
Signal transduction through IL-1R	0.13083714822631504	IL6
BMP receptor signaling	0.14039653544909864	PPP1R15A
Bladder cancer	0.14039653544909864	CXCL8
TWEAK signaling pathway	0.14039653544909864	IL6
Urokinase-type plasminogen activator (uPA) and uPAR-mediated signaling	0.14039653544909864	PLAUR
Growth hormone receptor signaling	0.14181417985588543	SOCS1
Type 1 diabetes mellitus	0.14181417985588543	IFNG
Gastrin pathway	0.1431905413269009	CXCL8
Heart development	0.1431905413269009	BHLHE40
Interleukin-12/STAT4 pathway	0.14452712595923564	IFNG
Wnt interactions in lipid metabolism and immune response	0.14452712595923564	CXCL1
Post-translational regulation of adherens junction stability and disassembly	0.15094499003057454	RIN2
Intestinal immune network for IgA production	0.15094499003057454	IL6
Chondroitin sulfate/dermatan sulfate metabolism	0.15094499003057454	VCAN
Interleukin-5 signaling pathway	0.15212625998793833	IL6
Ceramide signaling pathway	0.15212625998793833	EIF2AK2
Translation factors	0.1532739398037777	EIF2AK2
Type 2 diabetes mellitus	0.1532739398037777	SOCS1
Heparan sulfate/heparin glycosaminoglycan (HS-GAG) metabolism	0.15547313535713428	VCAN
Interleukin-2 receptor beta chain in T cell activation	0.15547313535713428	SOCS1
Signaling events mediated by PTP1B	0.15547313535713428	CSF1R
Signaling events mediated by stem cell factor receptor (c-Kit)	0.15547313535713428	SOCS1
Kit receptor signaling pathway	0.1602066385765643	SOCS1
Calcineurin-dependent NFAT signaling role in lymphocytes	0.16209042986650168	PIM1
Cytosolic DNA-sensing pathway	0.16394733255885005	IL6
Acute myeloid leukemia	0.16486693775042943	PIM1
Keratinocyte differentiation	0.16486693775042943	ETS2
Shigellosis	0.17741051282457979	CXCL8
Proteasome degradation	0.1791033325324409	IFNG
Endothelins	0.1807721518684349	EDN1
Signaling by TGF-beta receptor complex	0.18403937703428766	PPP1R15A
Endochondral ossification	0.18403937703428766	SPP1
Telomerase regulation	0.18563855551256292	IFNG
CD8/T cell receptor downstream pathway	0.18721527934556068	IFNG
NFAT involvement in hypertrophy of the heart	0.18876991466606255	EDN1
Complement and coagulation cascades	0.18931165944279588	PLAUR
MicroRNA regulation of DNA damage response	0.18931165944279588	GADD45B
Interleukin-6 signaling pathway	0.19082048942649313	IL6
Leishmaniasis	0.19132222320695658	IFNG
Sphingolipid metabolism	0.19132222320695658	SGPP2
Myc repressed pathway	0.1927871325594392	ID2
RANKL regulation of apoptosis and immune response	0.1942319290622871	IL6
MAPK signaling pathway	0.1945119834007232	DUSP5;GADD45B
Prolactin activation of MAPK signaling	0.19467372772954333	SOCS1
RIG-I/MDA5-mediated induction of interferon-alpha/beta pathways	0.19607712771076	ISG15
Transcriptional regulation of white adipocyte differentiation	0.19746145950259	HELZ2
Apoptosis regulation	0.19784757355964327	IFNG
Signaling by SCF-KIT	0.19784757355964327	SOCS1
Signaling events mediated by hepatocyte growth factor receptor (c-Met)	0.1982211703519625	RIN2
Unfolded protein response	0.1982211703519625	CXCL8
Antigen processing and presentation	0.20182936289135117	IFNG
Signaling by GPCR	0.20417173743938016	EDN1;CXCL8;CXCL1;CXCL5
ECM-receptor interaction	0.20664184527844476	SPP1
Integrin cell surface interactions	0.2068938184254084	SPP1
MicroRNAs in cardiomyocyte hypertrophy	0.2068938184254084	EDN1
Signal transduction	0.22285835450705818	EDN1;CXCL8;CXCL1;CXCL5
Dilated cardiomyopathy	0.23724956143364265	IL6
Melanogenesis	0.23724956143364265	EDN1
TNF-alpha signaling pathway	0.23724956143364265	IL6
Interleukin-4 signaling pathway	0.24240283568454662	SOCS1
Signaling by interleukins	0.251570845273469	IL6
Glycosaminoglycan metabolism	0.25244683195732925	VCAN
Lipid metabolism regulation by peroxisome proliferator-activated receptor alpha (PPAR-alpha)	0.25532761466074977	HELZ2
Fas signaling pathway	0.26015972720227243	CXCL8
Prolactin regulation of apoptosis	0.2637105768584961	MAFF
p53 activity regulation	0.2637105768584961	GADD45B
Lysosome	0.26715984503231033	LAMP3
Notch signaling pathway	0.26715984503231033	CSF1R
Signaling by PDGF	0.2678883023634401	SPP1
Factors involved in megakaryocyte development and platelet production	0.2724106891584871	MAFF
PDGFB signaling pathway	0.27873170118980084	EIF2AK2
Cell adhesion molecules (CAMs)	0.2849323717817811	VCAN
Ubiquitin-mediated proteolysis	0.288484263173256	SOCS1
Diabetes pathways	0.288484263173256	CXCL8
Natural killer cell-mediated cytotoxicity	0.288484263173256	IFNG
Systemic lupus erythematosus	0.28957684509637033	IFNG
T cell receptor signaling pathway	0.28957684509637033	IFNG
Influenza infection	0.2936513693209768	EIF2AK2
Hemostasis pathway	0.2987685340571859	MAFF;PLAUR
Lipid and lipoprotein metabolism	0.31609461248124116	HELZ2;SGPP2
Toll receptor cascades	0.31903061767453034	EIF2AK2
Fatty acid, triacylglycerol, and ketone body metabolism	0.3407681505498306	HELZ2
Post-translational protein modification	0.37561556387948875	PLAUR
Endocytosis	0.38166165377944244	CSF1R
Phospholipid metabolism	0.3859671433184034	SGPP2
Gastrin-CREB signaling pathway via PKC and MAPK	0.3859671433184034	EDN1
Focal adhesion	0.4231892621692119	SPP1
Carbohydrate metabolism	0.4242218774139564	VCAN
Antigen presentation: folding, assembly, and peptide loading of class I MHC proteins	0.4494588169096208	SOCS1
Disease	0.45549077444572833	CXCL8;EIF2AK2
FSH regulation of apoptosis	0.45618482402740107	ISG15
Insulin signaling pathway	0.4720011713878381	SOCS1
Innate immune system	0.5197593861737363	ISG15
Generic transcription pathway	0.5789185731500377	HELZ2
Developmental biology	0.6170745490398872	HELZ2
Protein metabolism	0.6338130308941828	PLAUR
Cell cycle	0.6405166996621569	GADD45B
Adaptive immune system	0.7450612766914776	SOCS1
Gene expression	0.8875514310167859	HELZ2

## Sheet: Table S6
Supplementary Table S6. Table used for GOPlot association between 44 DEGs and pathways in common across WBCs (GSE65088, GSE114179) and PBMCs (GSE42606, GSE154911).
	Interferon alpha/beta signaling	Interferon signaling	Immune system signaling by interferons, interleukins, prolactin, and growth hormones	Antiviral mechanism by interferon-stimulated genes	Type II interferon signaling (interferon-gamma)	Interleukin-23-mediated signaling events	Jak-STAT signaling pathway	TNF-alpha effects on cytokine activity, cell motility, and apoptosis	Toll-like receptor signaling pathway regulation	Interleukin-12-mediated signaling events	Interleukin-17 signaling pathway	NOD signaling pathway	Interferon-gamma signaling pathway	Interleukin-27-mediated signaling events	RIG-I-like receptor signaling pathway	GPCR ligand binding
SOCS1	1	1	1	0	1	0	1	0	1	1	0	0	1	0	0	0
OAS3	1	1	1	0	0	0	0	0	0	0	0	0	1	0	0	0
MX1	1	1	1	1	0	0	0	0	0	0	0	0	0	0	0	0
ISG15	1	1	1	1	1	0	0	0	0	0	0	0	0	0	1	0
IFIT1	1	1	1	1	0	0	0	0	0	0	0	0	0	0	0	0
USP18	1	1	1	1	0	0	0	0	0	0	0	0	0	0	0	0
IFIT3	1	1	1	0	0	0	0	0	0	0	0	0	0	0	0	0
IFNG	0	1	1	0	1	1	1	0	0	1	0	0	1	1	0	0
EIF2AK2	0	1	1	1	1	0	0	0	0	0	0	0	0	0	0	0
IL6	0	0	1	0	0	1	1	1	1	0	1	1	0	1	0	0
CXCL8	0	0	0	0	0	0	1	1	1	0	1	1	0	0	1	1
EDN1	0	0	0	0	0	0	0	0	0	0	0	0	0	0	0	1
CXCL1	0	0	0	0	0	1	0	1	0	0	0	1	0	0	0	1
CXCL5	0	0	0	0	0	0	0	0	0	0	0	0	0	0	0	1
PIM1	0	0	0	0	0	0	1	0	0	0	0	0	0	0	0	0
CD69	0	0	0	0	0	0	0	1	0	0	0	0	0	0	0	0
SPP1	0	0	0	0	0	0	0	0	1	0	0	0	0	0	0	0
GADD45B	0	0	0	0	0	0	0	0	0	1	0	0	0	0	0	0

## Sheet: Table S7
Supplementary Table S7. Loading values obtained by multi-factory study analyses of both common factors found between GSE65088 and GSE42606 mutual DEGs.
Genes	Common factor_1	Common factor_2	GSE65088 Specific factor_1	GSE65088 Specific factor_2	GSE42606 Specific factor_1	GSE42606 Specific factor_2
ASGR1	0.687158367292676	0.159501428883436	-0.365952626643297	0.424829873640644	0.189877409740055	-0.0611812364258699
BATF	-0.617224445085109	-0.557711504837877	-0.300370782491064	0.100244625293054	-0.132215024235574	0.0649180440938599
BHLHE40	-0.536023880428418	-0.543874278455866	-0.434647011217115	-0.0865637891396977	0.125805911983667	0.345216276992431
C1orf162	0.671043275265581	0.392285141985876	-0.345797446117339	-0.0148388718048478	0.0747952913799834	-0.179168199463358
CD69	-0.542370235221473	-0.571891969333339	0.421829152335473	-0.271240878072057	0.0137190386300657	0.186155842120324
CSF1R	0.644607507511914	0.334545335083174	-0.343278545712905	0.0873345713237354	0.241040224766925	-0.234600858206169
CXCL1	-0.735252964009936	-0.275551281033946	-0.113880040347847	-0.501712915200497	-0.000509090681907033	-0.331645514927364
CXCL5	-0.559969903514157	-0.231887021088111	-0.207395952807371	-0.391095084177953	0.173078530309028	-0.162751230319461
CXCL8	-0.736664931005661	-0.309178275698162	-0.396079021955799	-0.179743396339539	0.002230519006421	-0.374905918004376
DDX60L	-0.564704386395262	-0.55903318085769	-0.114994504740097	-0.280929209661231	-0.268892738354887	-0.0158674229103632
DUSP5	-0.514066510903288	-0.703508992344257	0.119078701237694	-0.12006826863359	0.166441851175889	0.0519093896156259
EDN1	-0.584545121604447	-0.668613461311407	0.15482506478727	0.0874109079940784	0.170599766443282	-0.146977002901947
EIF2AK2	-0.590189157365418	-0.587162215011744	0.942405177439284	0.335650187125888	-0.184689083941205	0.0353055612789733
EPSTI1	-0.521919180670862	-0.635761724266489	-0.34360438822487	-0.102313574914564	-0.120887636260376	0.125079872737341
ETS2	-0.624431587205384	-0.618815127987615	-0.0420643315863436	0.016638143068205	0.303583338012743	-0.0706754963797653
FNIP2	-0.613330758814298	-0.614627546160895	0.0703892087383065	0.202416055065304	0.300123859298771	-0.16973745021739
GADD45B	-0.578335814973471	-0.65287586988933	-0.363123761802141	0.116611958569246	0.288957033294973	0.113793670454681
HELZ2	-0.528457666377504	-0.710023228540244	0.0414094839000713	0.688627450440124	-0.0610278345990372	0.0471812162407195
HERC6	-0.586010592576069	-0.519561466346704	-0.414067493470977	-0.0195166186299299	-0.343371023281502	0.0107278473148211
ID2	-0.554441111311633	-0.541956582219869	0.880404377609817	0.141325759554508	-0.0625693805740746	0.159464387941146
IFI44L	-0.519662512062388	-0.6175976652637	0.968264125290121	0.112490185124098	-0.232853807757318	0.0458175695890746
IFIT1	-0.540325997128466	-0.681951617932139	-0.32319337624717	-0.0258330760376303	-0.0815798591556928	-0.022950238013662
IFIT3	-0.548182852890777	-0.672131521600249	0.190579556749034	-0.216314652681642	0.0422338951429064	-0.13058444495468
IFNG	-0.615824596136461	-0.578208630447354	-0.00225406024349503	-0.307034783347591	-0.0458475515796677	0.0638550069603137
IL6	-0.666574092647297	-0.572424577196966	0.795095215946288	0.121042796523454	0.13231961047528	-0.144429567232675
ISG15	-0.554233263686828	-0.672595085147089	-0.233335699698992	0.0849069312153461	-0.0930422067238807	0.0415202148311366
LAMP3	-0.583633603797299	-0.516103538503808	-0.129257443874752	0.395585765962357	-0.30660442473424	0.0768322834689817
MAFF	-0.655242322540369	-0.474300431300361	-0.179020642088991	0.331472831204151	0.358735501241205	-0.0474255627189509
MX1	-0.554872838333914	-0.665473954697737	-0.115144580550512	-0.134841155417499	-0.108980835542346	0.0470725575548032
OAS3	-0.59914244493113	-0.626013211401824	0.409421540455588	0.0510515126480815	-0.140484120499709	0.00849419221286629
PIM1	-0.48804675764686	-0.590996065807804	-0.00842547876795816	0.144443101135532	0.0914848404397309	0.245552968445163
PLAUR	-0.0460127011410748	-0.596065156953416	-0.0355354142685718	-0.411048357327277	0.940028515230133	-0.313621576194895
PPP1R15A	-0.552832572532962	-0.507942330492075	-0.479139205644485	-0.195136896258374	0.50002460924843	-0.147283890079786
RIN2	-0.58173262694425	-0.613624921169692	-0.489179589404179	0.0951306191606033	0.11872756147384	-0.284075997421385
RNF213	-0.396605569903787	-0.500237895038683	-0.104965495497449	-0.0299076913655184	-0.489137750432468	0.00771318351282875
RSAD2	-0.575120720345096	-0.643196957688794	0.132966389699469	0.0138801106333776	-0.141720352959033	0.00987942574658901
RTP4	-0.527239869525415	-0.631735539867817	0.619561976546108	0.0413524517229044	-0.274482908902802	0.0842237819946217
SAMD9L	-0.547863703443928	-0.614915020602982	0.197933664411585	-0.0609953136456248	-0.292963314055152	0.0587981823817368
SGPP2	-0.173547368310909	-0.650913793962991	0.0985888486419794	-0.0987569093419353	0.197961672126816	-0.198929455484011
SOCS1	-0.567088963840819	-0.591046611142925	-0.430611271722022	-0.0154508547288918	-0.0859531975588613	0.127891399010743
SPP1	-0.507014501546436	-0.571424203040895	-0.135835162366901	-0.168732493062462	-0.159934131384201	-0.137031376440422
USP18	-0.319470686317198	-0.310156579858784	0.0058745235977861	-0.742600727421757	0.177990433143928	-0.0751968383764169
VCAN	0.4721158565804	0.468521892297323	-0.588634004764821	-0.123945688093939	0.386995575702182	-0.277079435341813
ZC3H12A	-0.586630767789254	-0.492432892175685	-0.647968012942641	0.209738908942501	0.154758204500497	0.169235297130587

## Sheet: Table S8
Supplementary Table S8. List of shared biological processes among all datasets (GSE65088, GSE114179, GSE42606, GSE154911, E-MTAB-135, E-MTAB-751, GSE77969) generated by ClusterProfiler.
Common Biological Processes among all the datasets enrichment
positive regulation of cytokine production
T cell activation
response to molecule of bacterial origin
response to lipopolysaccharide
CD4-positive, alpha-beta T cell activation
myeloid leukocyte differentiation
alpha-beta T cell activation
regulation of T cell activation
stress-activated MAPK cascade
positive regulation of inflammatory response
regulation of adaptive immune response
CD4-positive, alpha-beta T cell differentiation
regulation of MAP kinase activity
lymphocyte differentiation
JNK cascade
regulation of adaptive immune response based on somatic recombination of immune receptors built from immunoglobulin superfamily domains
positive regulation of immune effector process
leukocyte cell-cell adhesion
stress-activated protein kinase signaling cascade
alpha-beta T cell differentiation
regulation of cell-cell adhesion
regulation of leukocyte cell-cell adhesion
positive regulation of adaptive immune response
regulation of inflammatory response
T cell differentiation
CD4-positive, alpha-beta T cell differentiation involved in immune response
regulation of leukocyte differentiation
positive regulation of leukocyte cell-cell adhesion
T-helper cell differentiation
alpha-beta T cell activation involved in immune response
alpha-beta T cell differentiation involved in immune response
regulation of stress-activated MAPK cascade
positive regulation of defense response
positive regulation of protein transport
T cell differentiation involved in immune response
regulation of stress-activated protein kinase signaling cascade
positive regulation of establishment of protein localization
regulation of JNK cascade
positive regulation of adaptive immune response based on somatic recombination of immune receptors built from immunoglobulin superfamily domains
cellular response to interferon-gamma
regulation of mononuclear cell proliferation
cellular response to biotic stimulus
positive regulation of leukocyte mediated immunity
positive regulation of cell-cell adhesion
regulation of leukocyte proliferation
regulation of lymphocyte proliferation
cellular response to molecule of bacterial origin
regulation of leukocyte mediated immunity
positive regulation of T cell activation
leukocyte chemotaxis
regulation of hemopoiesis
negative regulation of cell adhesion
cellular response to external stimulus
leukocyte proliferation
cellular response to lipopolysaccharide
positive regulation of DNA-binding transcription factor activity
myeloid cell differentiation
I-kappaB kinase/NF-kappaB signaling
positive regulation of T cell differentiation
regulation of alpha-beta T cell activation
cell chemotaxis
myeloid leukocyte migration
response to interferon-gamma
regulation of T-helper cell differentiation
regulation of I-kappaB kinase/NF-kappaB signaling
positive regulation of cell adhesion
positive regulation of lymphocyte differentiation
positive regulation of protein serine/threonine kinase activity
regulation of CD4-positive, alpha-beta T cell differentiation
regulation of lymphocyte activation
macrophage activation
positive regulation of MAP kinase activity
regulation of lymphocyte differentiation
positive regulation of receptor signaling pathway via STAT
regulation of alpha-beta T cell differentiation
positive regulation of hemopoiesis
positive regulation of NF-kappaB transcription factor activity
negative regulation of leukocyte activation
regulation of T cell differentiation
regulation of CD4-positive, alpha-beta T cell activation
response to tumor necrosis factor
neutrophil migration
interleukin-1 beta production
mononuclear cell proliferation
positive regulation of tyrosine phosphorylation of STAT protein
regulation of bone resorption
STAT
activation of protein kinase activity
positive regulation of lymphocyte mediated immunity
negative regulation of cell activation
bone resorption
lymphocyte proliferation
granulocyte migration
defense response to virus
negative regulation of immune system process
negative regulation of phosphorylation
tyrosine phosphorylation of STAT protein
ERK1 and ERK2 cascade
positive regulation of T cell cytokine production
regulation of tyrosine phosphorylation of STAT protein
positive regulation of stress-activated MAPK cascade
positive regulation of stress-activated protein kinase signaling cascade
positive regulation of leukocyte differentiation
negative regulation of protein phosphorylation
positive regulation of production of molecular mediator of immune response
regulation of lymphocyte mediated immunity
positive regulation of I-kappaB kinase/NF-kappaB signaling
chemokine production
positive regulation of receptor signaling pathway via JAK-STAT
response to virus
response to steroid hormone
positive regulation of tumor necrosis factor production
leukocyte migration
positive regulation of JNK cascade
neutrophil chemotaxis
interleukin-1 production
positive regulation of secretion by cell
regulation of T cell proliferation
positive regulation of tumor necrosis factor superfamily cytokine production
negative regulation of lymphocyte activation
regulation of interspecies interactions between organisms
response to interleukin-1
lymphocyte activation involved in immune response
regulation of cysteine-type endopeptidase activity
positive regulation of CD4-positive, alpha-beta T cell differentiation
cellular response to tumor necrosis factor
positive regulation of alpha-beta T cell activation
cellular response to drug
positive regulation of protein secretion
regulation of ERK1 and ERK2 cascade
negative regulation of viral genome replication
regulation of interleukin-1 beta production
granulocyte chemotaxis
T cell proliferation
regulation of viral genome replication
positive regulation of alpha-beta T cell differentiation
viral life cycle
positive regulation of peptide secretion
tumor necrosis factor production
regulation of tumor necrosis factor superfamily cytokine production
positive regulation of interleukin-6 production
neuroinflammatory response
cellular response to interleukin-1
regulation of tumor necrosis factor production
tumor necrosis factor superfamily cytokine production
negative regulation of cell-cell adhesion
negative regulation of viral process
regulation of viral process
positive regulation of cell activation
regulation of cytokine-mediated signaling pathway
cytokine secretion
response to nutrient levels
positive regulation of CD4-positive, alpha-beta T cell activation
regulation of response to biotic stimulus
positive regulation of interleukin-2 production
regulation of leukocyte chemotaxis
regulation of immune effector process
regulation of chemokine production
positive regulation of mononuclear cell proliferation
positive regulation of leukocyte activation
positive regulation of T-helper cell differentiation
regulation of response to cytokine stimulus
microglial cell activation
leukocyte activation involved in inflammatory response
regulation of GTPase activity
regulation of interleukin-6 production
positive regulation of interleukin-1 beta production
regulation of interleukin-1 production
viral genome replication
interleukin-6 production
positive regulation of lymphocyte proliferation
receptor signaling pathway via STAT
negative regulation of viral life cycle

## Sheet: Table S9
Supplementary Table S9. List of shared biological processes and their associated DEGs among all datasets (GSE65088, GSE114179, GSE42606, GSE154911, E-MTAB-135, E-MTAB-751, GSE77969) generated by ClusterProfiler.
	GSE65088	GSE114179	GSE42606	GSE154911	E-MTAB-135	E-MTAB-751	GSE77969
CD4-positive, alpha-beta T cell activation	BATF/NLRP3/CD55/ANXA1/IFNG/IL6/PTGER4/BCL6/NFKBIZ/ZC3H12A/SOCS1/RIPK2/RSAD2/CD83/CD86	TCIRG1/BATF/MALT1/CD160/NLRP3/RC3H1/GPR183/IL27/FUT7/TMEM98/PLA2G2D/FOXP1/CD274/STOML2/IFNG/IL2/IL6/IL12A/IL12B/IL18/IRF4/TARM1/ZBTB7B/IL23A/ATP7A/SASH3/RC3H2/PTGER4/BCL6/RORA/VSIR/SEMA4A/NFKBIZ/TNFSF4/ZC3H12A/NFKBID/RUNX1/SOCS1/RIPK2/IL18R1/RSAD2/CD80/SOCS5	BATF/NLRP3/HLX/IFNG/IL6/IL12B/NFKBIZ/ZC3H12A/SOCS1/RIPK2/RSAD2/CD83/CD86	IRF4/IL12B/SOCS1/RSAD2/IL23A/RELB/CD274/IL6/IL4R/BATF/ZC3H12A/CD83/JAK3/CCL19/TBX21/IFNG/FOXP3/BCL6/MYB/XCL1/CD86/VSIR/ANXA1	MALT1/CD274/NCKAP1L/IL4R/IL6/SASH3/PTGER4/BCL6/VSIR/NFKBIZ/TGFBR2/ZC3H12A/NFKBID/RIPK2/RSAD2/CD83/CD80/CD86	MALT1/IL6/IL12B/IL23A/NFKBIZ/ZC3H12A/NFKBID/RIPK2	CD86/CD80/CD83/RSAD2/IL18R1/RIPK2/RUNX3/NFKBID/TNFSF4/SPN/NFKBIZ/VSIR/SATB1/BCL6/RARA/PTGER4/SASH3/IL23A/SMAD7/LGALS9/JAK3/IRF4/IL12B/IL12A/IL4R/IFNG/HMGB1/NCKAP1L/CD274/IL27/GPR183/MALT1
myeloid leukocyte differentiation	TRIB1/BATF/BATF2/CCR1/CSF1/CSF1R/ANXA2/ID2/IFI16/IFNG/IRF7/JUN/LIF/CCL3/TFRC/KLF10/TNF/VEGFA/DCSTAMP/GAB2/FARP2	CDK6/TCIRG1/CEBPA/CEBPB/CEBPE/BATF/LILRB1/LILRB3/CCR7/OSCAR/IL31RA/PPARGC1B/CD109/CSF1/CSF1R/CSF2/CSF3/TMEM64/ZNF675/GPR183/EFNA4/EPHA2/ESRRA/F2RL1/FBN1/FCER1G/SIRT1/DHRS7B/FOXP1/SIGLEC15/SNX10/HCLS1/ID2/IFI16/IFNG/IL12B/IL15/INHBA/IRF4/KIT/LIF/LTBR/MITF/MMP9/MT1G/NF1/NME1/PDE1B/IL23A/PIK3R1/TREM2/MED1/TESC/BATF3/PRKCA/PRTN3/FAM20C/BGLAP/CCL3/SPI1/TCTA/TFE3/TFRC/TYROBP/VEGFA/CA2/CAMK4/DCSTAMP/PRX…	BATF/CSF1R/CSF2/EVI2B/FOS/ID2/IFI16/IFNG/IL12B/IRF7/MYC/CCL3/SPI1/TNF/TYROBP/UBASH3B/RASSF2	IRF4/IL12B/IL23A/CSF1/RELB/INHBA/CDK6/ID2/OCSTAMP/BATF/CCL19/BATF3/CSF2/LIF/IFNG/GATA2/KLF10/TYROBP/FAM20C/TREM2/CCR1/MAFB/FCER1G/FOS/LYN/EVI2B/LTF/CSF1R/CEBPB/LTBR/TLR4/GAB2/MMP9/LRRK1/CTNNBIP1/MT1G/NRROS/APP	DHRS2/CEBPA/OCSTAMP/PARP1/CSF1/CSF1R/CSF2/EVI2B/FES/IFI16/INPP5D/NRROS/BATF3/CCL3/SRC/ZFP36L1/TFRC/TGFBR2/TNF/UBASH3B/MAFB	OCSTAMP/CSF1/CSF2/FOS/IL12B/JUN/MMP9/IL23A/CCL3/SRC/TNF/MAFB	CDC42/MAFB/CBFA2T3/PIR/UBASH3B/CUL4A/VEGFA/C1QC/TNF/TFRC/TAL1/SRC/CCL3/RARA/CTNNBIP1/PIK3R1/PIK3CD/IL23A/KITLG/MEF2C/NRROS/IRF7/IRF4/INPP5D/INHBA/IL15/IL12B/APP/IFNG/ID2/SNX10/FES/FBN1/EVI2B/EFNA4/GPR183/CTNNB1/CSF2/CSF1R/CSF1/MAPK14/PARP1/GAB3/CD109/CCR7/LILRB4/CEBPB/CEBPA/TRIB1/CDK6/DHRS2/TSPAN2
stress-activated MAPK cascade	TRIB1/TLR6/DUSP1/DUSP3/EDN1/ERN1/PTK2B/IL36RN/IRAK1/IRAK2/GADD45B/MAP2K3/EIF2AK2/PTGER4/CARD9/TNF/VEGFA/ZFP36/ZC3H12A/RIPK2/SPHK1/SPAG9/MAP4K4	SH2D3C/HIPK3/RASGRP1/NOD1/MAP3K2/ZMYND11/EDAR/MAP4K5/DUSP10/PDCD10/CHUK/CCR7/MAP3K8/SH3RF2/CYLD/GADD45A/ZNF675/DLG1/DUSP1/DUSP3/EDN1/EPHA4/EPHB1/ERCC6/ERN1/F2RL1/FKTN/TNIK/FOXO1/TAB2/PLCB1/PHLPP1/MAPK8IP2/TAB3/MAGI3/IL36RN/IL36B/PDCD4/GPS1/GPS2/GRIK2/DBNL/HIPK2/PYCARD/GSTP1/MDFIC/HGF/IGF1R/FAS/IL1B/SAMD5/LTBR/MAP3K4/MAP3K5/MAP3K11/MMP8/GADD45B/NFKB1/NPHS1/OPRK1/PAK1/DACT1/INAVA/PKN1/MAPK8/MAP2K2/…	MAP3K8/EDN1/MLKL/DNAJA1/FAS/IL1B/IL1RN/IRAK2/MAP3K4/MYC/GADD45B/NFKB1/EIF2AK2/IL36G/NCF1/TNF/ZC3H12A/RIPK2/RASSF2	NFKB1/GADD45B/ZC3H12A/GADD45G/EDN1/IL1B/EIF2AK2/CCL19/IRAK2/IL36G/RASGRP1/SLAMF1/TRAF2/IL36RN/TRAF4/GADD45A/NOD1/FAS/MAPK13/TNIP2/MAP3K8/SIRPA/SDCBP/ZEB2/LTBR/PAK1/TLR4/FCGR2B/RAP2A/APP	NOD1/MAP4K1/MAP3K8/CRKL/GADD45A/DUSP1/EDN1/FGD2/IL36RN/PYCARD/IGBP1/IL1B/IL1RN/IRAK2/MAP3K4/GADD45B/NFKB1/PAK1/MAPK13/MAP2K3/IL36G/PTGER4/QARS1/RAP2A/CARD9/ZFP36L1/SYK/TNF/TNIP2/ZC3H12A/RIPK2/HDAC3/SPHK1/SPAG9/MAP3K6/ARHGEF6/RB1CC1/ZEB2	MAP3K8/EDN1/IL1B/IL1RN/IRAK2/MAP2K3/TNF/ZC3H12A/RIPK2	ARHGEF6/MAP4K4/MAP3K13/SPAG9/BTRC/SPHK1/HDAC3/RIPK2/CUL1/TNIP2/WNT5A/VEGFA/TRAF2/TNF/TIAM1/SYK/PINK1/AIDA/CARD9/PTPN1/PTGER4/IL36G/EIF2AK2/MAP2K7/MAP2K3/MAPK13/MAPK9/MAPK8/HACD3/PAK1/NFKB1/GADD45B/MAP3K5/MAP3K4/MAP3K3/LGALS9/IRAK2/IL1RN/IL1B/APP/IGF1R/HMGB1/PYCARD/HIPK2/TAB2/FOXO1/PTK2B/DUSP3/DUSP1/GADD45A/SH3RF2/CCN2/MAPK14/SIRPA/MAP3K8/CCR7/MAP4K1/MAP4K5/NOD1/SEMA3A/TRIB1/SH2D3C
positive regulation of inflammatory response	TLR6/IL6/LPL/CCL3L3/OSM/SUCNR1/PTGER4/CCL3/CCL3L1/CCL14/NFKBIZ/CLEC7A/TNF/PLA2G7/IL1RL1	CEBPA/CEBPB/PARK7/GBP5/CCR7/CNR1/ETS1/FCER1G/CDK19/APPL1/STAP1/NUPR1/PDCD4/NEAT1/GRN/LILRA5/IL1B/IL2/IL6/IL6ST/IL12B/IL15/IL18/JAK2/LPL/LTA/MGST2/MMP8/ABCC1/OSM/TLR7/IL23A/GPRC5B/TREM2/SUCNR1/PTGER3/PTGER4/PTGS2/TRPV4/S100A8/S100A9/S100A12/CCL3/CCL3L1/CCL18/CX3CL1/GPSM3/NOD2/NFKBIZ/CLEC7A/TGM2/TNFRSF1A/TNFSF4/VAMP8/HYAL2/TNFRSF11A/NLRP12/IL1RL1/OSMR/CD28/CLOCK	GBP5/TICAM1/STAP1/FFAR2/IL1B/IL6/IL12B/IDO1/LDLR/LTA/CCL3L3/NFKBIA/TLR7/PTGS2/CCL3/CCL3L1/CCL14/NFKBIZ/TNF/CCR2/NLRP12	IL12B/IL23A/GBP5/PTGS2/NFKBIA/IL6/TNIP1/IL1B/CD6/SUCNR1/TRADD/MAPK13/ITGA2/PLA2G7/CLEC7A/TREM2/CTSC/FCER1G/VAMP8/IL17RA/TLR7/CEBPB/JAK2/TLR4/TNFRSF1A/FABP4	CEBPA/CTSC/CDK19/IL1B/IL6/LPL/LTA/CCL3L3/NFKBIA/OSM/PIK3CG/MAPK13/SUCNR1/PTGER4/PTGS2/CCL1/CCL3/CCL3L1/NFKBIZ/BTK/TNF/TNFRSF1A	IL1B/IL6/IL12B/LTA/SERPINE1/IL23A/PTGS2/S100A8/S100A9/CCL3/CCL3L1/NFKBIZ/TNF	VAMP8/TSLP/WNT5A/TNFSF4/TNF/TAC1/NFKBIZ/CCL14/CCL3L1/CCL3/PTGS2/PTGER4/PTGER3/MAPK13/IL23A/NFKBIA/ABCC1/MGST2/IDO1/IL15/IL12B/IL1B/LILRA5/APPL1/NAPEPLD/CCR7/GBP5/CTSC/CEBPB/CEBPA/TNIP1
JNK cascade	TRIB1/TLR6/DUSP3/EDN1/ERN1/PTK2B/IL36RN/IRAK1/IRAK2/GADD45B/PTGER4/CARD9/TNF/RIPK2/SPAG9/MAP4K4	SH2D3C/HIPK3/RASGRP1/NOD1/MAP3K2/ZMYND11/EDAR/MAP4K5/DUSP10/CCR7/SH3RF2/CYLD/GADD45A/ZNF675/DUSP3/EDN1/EPHA4/EPHB1/ERCC6/ERN1/F2RL1/FKTN/TNIK/TAB2/PLCB1/PHLPP1/MAPK8IP2/TAB3/MAGI3/IL36RN/IL36B/PDCD4/GPS1/GPS2/GRIK2/DBNL/HIPK2/PYCARD/GSTP1/MDFIC/IGF1R/IL1B/SAMD5/LTBR/MAP3K4/MAP3K5/MAP3K11/MMP8/GADD45B/NPHS1/PAK1/DACT1/PKN1/MAPK8/PTGER4/TAOK1/TRPV4/NOD2/AIDA/NCF1/SYK/MAP3K7/UBC/UBE2V1/WNT7B/FZD5/AR…	EDN1/MLKL/DNAJA1/IL1B/IL1RN/IRAK2/MAP3K4/GADD45B/IL36G/NCF1/TNF/RIPK2/RASSF2	GADD45B/GADD45G/EDN1/IL1B/CCL19/IRAK2/IL36G/RASGRP1/SLAMF1/TRAF2/IL36RN/TRAF4/GADD45A/NOD1/SIRPA/SDCBP/ZEB2/LTBR/PAK1/TLR4/FCGR2B/RAP2A/APP	NOD1/MAP4K1/CRKL/GADD45A/EDN1/FGD2/IL36RN/PYCARD/IL1B/IL1RN/IRAK2/MAP3K4/GADD45B/PAK1/IL36G/PTGER4/RAP2A/CARD9/SYK/TNF/RIPK2/HDAC3/SPAG9/MAP3K6/ARHGEF6/RB1CC1/ZEB2	EDN1/IL1B/IL1RN/IRAK2/TNF/RIPK2	ARHGEF6/MAP4K4/MAP3K13/SPAG9/HDAC3/RIPK2/WNT5A/TRAF2/TNF/TIAM1/SYK/PINK1/AIDA/CARD9/PTPN1/PTGER4/IL36G/MAP2K7/MAPK9/MAPK8/HACD3/PAK1/GADD45B/MAP3K5/MAP3K4/IRAK2/IL1RN/IL1B/APP/IGF1R/HMGB1/PYCARD/HIPK2/TAB2/PTK2B/DUSP3/GADD45A/SH3RF2/CCN2/SIRPA/CCR7/MAP4K1/MAP4K5/NOD1/SEMA3A/TRIB1/SH2D3C
regulation of cell-cell adhesion	RGCC/BMP6/VEGFA/PPM1F	RASGRP1/EBI3/FLOT1/LILRB2/CEBPB/NFAT5/HSPH1/LILRB1/MALT1/CD160/CORO1A/DUSP10/CD300A/VSIG4/NLRP3/CCR7/MAP3K8/CCM2L/RC3H1/BTLA/CYLD/DLG1/JAG1/DUSP3/EFNB2/EGR3/AIF1/ETS1/ZBTB1/KIFAP3/LRRC32/PLA2G2D/GCNT2/GLI3/PYCARD/CD274/ICOS/HLA-DPB1/HLA-G/ICAM1/CLEC4G/NEXMIF/IFNB1/IFNG/IGF1/IGFBP2/IL1B/IL2/IL6/IL6ST/IL7R/IL12A/IL12B/IL15/IL18/ITGA6/ITGA4/ITGB2/JAK2/MIA3/ARG1/LGALS1/LGALS3/EPCAM/AFDN/TARM1/PAK1/ZB…	NLRP3/MAP3K8/ADORA2A/RGCC/ICOS/HLX/IFNB1/IFNG/IL1B/IL1RN/IL2RA/IL6/IL12B/IDO1/IRF1/LAG3/CCL2/NFKBIZ/TNF/CCR2/ZC3H12A/ADTRP/UBASH3B/SOCS1/ADAM19/RIPK2/CD83/CD86	IL2RA/IL12B/SOCS1/IL23A/ADAM19/IRF1/CD274/ADTRP/ANK3/IL6/IL4R/CD70/ZC3H12A/CD83/IL1B/CD6/TNFSF14/JAK3/CCL19/RASGRP1/EGR3/EBI3/TBX21/IFNG/FOXP3/BCL6/TIGIT/MYB/XCL1/MAP3K8/FGL2/CD9/LGALS3/PTAFR/SIRPA/ITGB2/LGALS1/VSIG4/LYN/CD209/GRB2/HLA-DPB1/CD86/CEBPB/JAK2/PAK1/VSIR/FCGR2B/CITED2/PDCD1LG2/ANXA1/PRKCD/CD1D	MAD2L2/MALT1/CORO1A/MAP3K8/ADORA2A/CSK/FLOT2/FYN/LRRC32/RGCC/PYCARD/CD274/NCKAP1L/IL1B/IL1RN/IL4R/IL6/IL7R/MBP/NCK1/PAK1/PDCD1/SERPINE2/SASH3/SELENOK/BCL6/CCL2/CCL5/SDC4/VSIR/NFKBIZ/BMP6/SRC/SYK/TFRC/TGFBR2/TNF/TNFAIP8L2/NR4A3/ZC3H12A/DOCK8/NFKBID/UBASH3B/RIPK2/CD83/KLF4/CD80/CD86/PPM1F	MALT1/MAP3K8/LRRC32/RGCC/IFNB1/IL1B/IL1RN/IL6/IL7R/IL12B/PDCD1/IL23A/PTAFR/CCL5/SDC4/NFKBIZ/SRC/TNF/ZC3H12A/NFKBID/TNFSF14/RIPK2	CDC42/TESPA1/CD70/PPM1F/CD86/CD80/KLF4/CD83/RIPK2/TNFSF9/RUNX3/PLPP3/UBASH3B/ADTRP/NFKBID/NCK2/MAD1L1/CASP3/CD276/NR4A3/TNFAIP8L2/WNT5A/VEGFA/VAV1/TNFSF4/TNF/TFRC/SYK/SRC/SPN/BMP6/NFKBIZ/VSIR/CCL5/BCL6/RDX/RARA/PTPN6/PELI1/MAP2K5/PAG1/SASH3/PIK3R1/IL23A/PAK1/AFDN/MBP/SMAD7/LGALS9/LAG3/JAK3/IRF1/IDO1/IL15/IL12B/IL12A/IL7R/IL7/IL4R/IL2RA/IL1RN/IL1B/IFNG/ICAM1/HMGB1/HLA-DMB/CD209/HFE/NCKAP1L/CD274/P…
T cell differentiation	BATF/NLRP3/ANXA1/IFNG/IL6/ZMIZ1/PTGER4/BCL6/NFKBIZ/ZC3H12A/SOCS1/RIPK2/RSAD2/CD83/CD86	BATF/MALT1/NLRP3/RC3H1/GPR183/FCER1G/IL27/TMEM98/FOXP1/CLEC4D/IFNG/IL2/IL6/IL12B/IL18/IRF4/ZBTB7B/IL23A/ATP7A/RC3H2/PTGER4/BCL6/RORA/SEMA4A/NFKBIZ/TNFSF4/ZC3H12A/NFKBID/RIPK2/IL18R1/CD80/SOCS5	BATF/NLRP3/HLX/IFNB1/IFNG/IL2RA/IL6/IL12B/IRF1/ITK/LAG3/LFNG/NFKBIZ/CCR2/ZC3H12A/SOCS1/RIPK2/RSAD2/CD83/CD86	IL2RA/IRF4/IL12B/SOCS1/RSAD2/IL23A/EGR1/RELB/TNFRSF18/IRF1/CDK6/BCL2/IL6/IL4R/BATF/ZC3H12A/ITK/CD83/JAK3/CCL19/CD2/RASGRP1/EGR3/ZEB1/TBX21/IFNG/FOXP3/BCL6/MYB/FGL2/MAFB/FCER1G/CD86/VSIR/ANXA1/CD1D	MALT1/DOCK2/EGR1/NCKAP1L/IL4R/IL6/IL7R/SASH3/PTGER4/BCL6/VSIR/NFKBIZ/ZFP36L1/SYK/TGFBR2/ZC3H12A/NFKBID/RIPK2/TNFRSF18/RSAD2/CD83/CD80/CD86/TNFSF8/MAFB	MALT1/EGR1/IFNB1/IL6/IL7R/IL12B/IL23A/NFKBIZ/ZC3H12A/NFKBID/RIPK2/MAFB	MAFB/TESPA1/CD86/CD80/CD83/RSAD2/IL18R1/TNFRSF18/RIPK2/TNFSF9/RUNX3/NFKBID/VAV1/TNFSF4/SYK/ZFP36L2/SPN/SOX4/NFKBIZ/VSIR/PRDM1/SATB1/BCL6/BCL2/RARA/PREX1/PTGER4/SASH3/PIK3CD/IL23A/NFATC2/SMAD7/LGALS9/LAG3/JAK3/IRF4/IRF1/IL15/IL12B/IL12A/IL7R/IL7/IL4R/IL2RA/IFNG/HMGB1/HLA-DOA/NCKAP1L/CLEC4E/ABL1/IL27/FANCD2/GPR183/DOCK2/CTNNB1/CCR7/LILRB4/MALT1/FGL2/CDK6/ADA
cellular response to interferon-gamma	TRIM22/IFI30/EDN1/HCK/ICAM1/IRF8/IFNG/IRF7/CCL3L3/MT2A/OAS1/OAS2/OAS3/RAB20/CCL3/CCL3L1/CCL8/CCL14/CCL20/CCL22/STAT1/STX4/ACOD1/VIM/TRIM25/CASP1/PARP9/TRIM5/OASL/SOCS1/SOCS3/CD44	NR1H3/CDC42EP2/IFI30/GBP4/GBP5/DAPK3/GBP6/EDN1/AIF1/RAB12/FCGR1B/RPL13A/GAPDH/GBP3/GSN/HCK/HLA-A/HLA-B/HLA-C/HLA-DPB1/HLA-DQB2/HLA-DRB1/HLA-G/ICAM1/IRF8/IFNG/IL12B/IRF4/IRF5/JAK1/JAK2/KIF5B/ARG1/GBP7/OAS1/OAS3/TRIM34/PARP14/MED1/KIF16B/RAB20/PRKCD/PTAFR/CCL3/CCL3L1/CCL4/CCL18/CCL22/CX3CL1/SLC26A6/SP100/STXBP2/STXBP3/ACTG1/TXK/ACOD1/VCAM1/TRIM25/ZYX/CAMK2A/CAMK2B/TRIM5/OASL/SOCS1/CLDN1	TRIM22/IRF9/IFI30/GBP4/GBP5/EDN1/GBP1/IRF8/IFNG/IL12B/IRF1/IRF7/CCL4L1/CCL3L3/MT2A/OAS1/OAS2/OAS3/PML/PARP14/CCL2/CCL3/CCL3L1/CCL7/CCL8/CCL14/CCL20/SLC26A6/TRIM21/STAT1/ACOD1/WAS/TRIM25/TRIM8/PARP9/TRIM5/OASL/SOCS1/SOCS3/NMI	IRF4/IL12B/SOCS1/GBP4/TRIM22/GBP5/CCL20/IRF1/GAPDH/CCL22/PARP14/NLRC5/OAS2/PARP9/EDN1/GBP3/CCL19/OAS3/GBP7/IFNG/XCL1/GSN/MRC1/PTAFR/SIRPA/RAB20/HLA-DPB1/DAPK1/JAK2/TLR4/WAS/VAMP3/PRKCD/FCGR1A	CDC42EP2/TRIM38/EDN1/EPRS1/RPL13A/CDC42EP4/HCK/RAB7B/IFNGR1/CCL4L1/CCL3L3/CCL1/CCL2/CCL3/CCL3L1/CCL4/CCL5/CCL20/WAS/TRIM8/PIAS1/OASL/SOCS3	EDN1/RAB7B/IL12B/CCL4L1/PTAFR/CCL3/CCL3L1/CCL4/CCL5/CCL7/CCL20	CD58/STX8/CLDN1/SOCS3/OASL/NLRC5/PARP9/CAMK2G/TRIM8/TRIM25/WNT5A/STAT1/SLC26A6/CCL22/CCL20/CCL15/CCL14/CCL5/CCL4/CCL3L1/CCL3/KIF16B/PARP14/EVL/OAS3/OAS2/OAS1/LGALS9/GBP7/CCL4L1/IRF7/IRF4/IRF1/IL12B/IFNG/IRF8/RAB7B/ICAM1/HLA-F/GBP3/GBP1/EPRS1/RAB12/AIF1/SIRPA/GBP5/GBP4/VPS26B
myeloid cell differentiation	TRIB1/BATF/BATF2/CCR1/CSF1/CSF1R/PTK2B/ANXA2/H3-3B/HSPA1B/IRF8/ID2/IFI16/IFNG/IRF7/JUN/LGALS3/LIF/MIR221/PURB/BCL6/CCL3/STAT1/TFRC/THBS1/KLF10/TNF/VEGFA/ZFP36/NR4A3/DCSTAMP/DPY30/ISG15/GAB2/FARP2	CDK6/CDKN1C/CDKN2B/TCIRG1/CEBPA/CEBPB/CEBPE/BATF/LILRB1/LILRB3/RASGRP4/H4-16/CCR7/OSCAR/ANKRD54/IL31RA/PPARGC1B/CD109/CREBBP/CSF1/CSF1R/CSF2/CSF3/CSF3R/TMEM64/ZNF675/JAG1/GPR183/EFNA4/EPHA2/EP300/EPAS1/ESRRA/ETS1/F2RL1/FBN1/FCER1G/TNRC6B/FLI1/NBEAL2/SIRT1/G6PD/DHRS7B/FOXP1/SIGLEC15/DLL1/HIPK2/SNX10/GPR171/HCLS1/HOXB7/HSPA1A/HSPA1B/IRF8/ID2/IFI16/IFNG/IL12B/IL15/INHBA/IRF4/EIF6/JAK2/KIT/LGALS3/LIF…	ADAR/BATF/CSF1R/CSF2/EVI2B/FOS/HSPA1A/HSPA1B/IRF8/ID2/IFI16/IFNG/IL12B/IRF7/MOV10/MYC/NFKBIA/PML/CCL3/SPI1/STAT1/TNF/TYROBP/UBASH3B/ISG15/RASSF2	IRF4/IL12B/IL23A/CSF1/RELB/INHBA/GPR171/NFKBIA/CDK6/ID2/OCSTAMP/BATF/JAK3/CCL19/BATF3/CSF2/LIF/IFNG/ISG15/BCL6/GATA2/KLF10/TYROBP/FAM20C/LGALS3/TREM2/CCR1/MAFB/ZNF385A/FCER1G/FOS/CSF3R/LYN/EVI2B/LTF/CSF1R/THBS1/SCIN/CEBPB/LTBR/JAK2/TLR4/PRDX3/GAB2/MMP9/LRRK1/CTNNBIP1/MT1G/NRROS/APP	DHRS2/IKZF1/CEBPA/FAM210B/ADD1/OCSTAMP/PARP1/CSF1/CSF1R/CSF2/EVI2B/FES/TNRC6B/SIN3A/NCKAP1L/HMGB2/RAB7B/IFI16/INPP5D/NRROS/NFE2/NFKBIA/SLC11A2/KLF13/PRMT6/BATF3/BCL6/CCL3/SRC/ZFP36L1/TFRC/TGFBR2/TNF/NR4A3/WDR61/H4C3/KAT8/UBASH3B/ASH2L/ATP5IF1/MAFB	OCSTAMP/CSF1/CSF2/FOS/RAB7B/IL12B/JUN/MMP9/NFE2/IL23A/CCL3/SRC/TNF/MAFB	PTBP3/CDC42/MAFB/ISG15/ATP5IF1/CBFA2T3/SCIN/PIR/UBASH3B/CUL4A/DYRK3/KAT8/CASP3/NR4A3/ZNF16/VEGFA/C1QC/TNF/THBS1/TFRC/TAL1/STAT1/SRC/BPGM/CCL3/BCL6/RARA/PTPN6/CTNNBIP1/P4HTM/PIP4K2A/PIK3R1/PIK3CD/IL23A/SLC11A2/NFKBIA/KITLG/MEF2C/SMAD5/NRROS/JAK3/IRF7/IRF4/INPP5D/INHBA/IL15/IL12B/APP/IFNG/ID2/IRF8/RAB7B/NCKAP1L/GPR171/SNX10/HIPK2/CLEC5A/FLI1/TNRC6B/FES/FBN1/PTK2B/EVI2B/ERCC2/EPAS1/EFNA4/GPR183/CTNN…
I-kappaB kinase/NF-kappaB signaling	TLR6/TRIM22/CARD16/IL36RN/IRAK1/IRAK2/CARD9/STAT1/TNF/TRIM25/ZC3H12A/CASP1/TRIM5/RIPK2/SQSTM1/CD14/CD36/CD40	TANK/NOD1/ZMYND11/MALT1/EDAR/PIM2/MID2/AKAP13/CHUK/CARD16/CCR7/DHX36/NLRP6/ZNF675/ESR1/F2RL1/FKBP1A/ERC1/TAB2/ZDHHC17/SIRT1/IFIT5/TAB3/ANKRD17/IL36RN/ATP2C1/IL36B/NKIRAS2/CCDC22/PYCARD/TBK1/GSTP1/BIRC2/BIRC3/HTR2B/JMJD8/IL1B/FASLG/LGALS1/LTBR/ROR1/TLR7/PDPK1/GPRC5B/NDFIP2/PPM1B/PIDD1/INAVA/PRKCE/PELI2/MIER1/REL/ROCK1/RORA/S100A4/S100A12/S100A13/CX3CL1/SECTM1/NOD2/AZI2/MAP3K7/TGM2/TLE1/TNFRSF1A/UB…	TRIM22/RBCK1/PIM2/TICAM1/IFIT5/BIRC3/IL1B/IL1RN/IRAK2/NFKBIA/TLR7/CXXC5/IL36G/STAT1/BST2/TNF/TRIM25/TNIP3/ZC3H12A/TRIM8/TRIM5/TNFSF10/RIPK2/CFLAR/NLRP12/CD40	TRIM22/TNIP3/ALPK1/RELB/NFKBIA/TNIP1/TNFAIP3/ZC3H12A/IL1B/CCL19/IRAK2/IL36G/NDFIP2/TRAF2/IL36RN/RBCK1/IFIT5/TRADD/NOD1/TNIP2/RHOC/S100A4/SIRPA/LGALS1/CD14/TLR7/LTF/SECTM1/LTBR/CD36/TLR4/CX3CR1/TNFRSF1A/NEK6/TIFAB	NOD1/TRIM38/MALT1/ECT2/FYN/IL36RN/NKIRAS1/PYCARD/IL1B/IL1RN/IRAK2/NFKBIA/IL36G/TMEM9B/SPHK2/REL/CARD9/BTK/TNF/TNFAIP3/TNFRSF1A/TNIP2/ZC3H12A/TRIM8/TMEM101/NFKBID/RIPK2/CFLAR/TIAF1/CD40	MALT1/IL1B/IL1RN/IRAK2/TNF/TNFAIP3/ZC3H12A/NFKBID/RIPK2	CD40/CD36/MTDH/MAP3K14/BTRC/CFLAR/RIPK2/NFKBID/CARD19/TRIM8/NLRX1/TNIP2/TRIM25/WNT5A/UBE2I/TRAF5/TRAF2/TNFAIP3/TNF/BST2/STAT1/PINK1/CARD9/REL/PELI1/IL36G/FAIM/NDFIP2/HACD3/GOLT1B/NFKBIA/MAP3K3/LGALS9/IRAK2/IL1RN/IL1B/BIRC3/BIRC2/PYCARD/CCDC22/ABL1/IFIT5/TAB2/TRIM32/CARD8/CTNNB1/SIRPA/CCR7/CARD16/PIM2/MALT1/TRAF3IP2/NOD1/TNIP1/TANK
myeloid leukocyte migration	CD300A/CCR1/CSF1/DUSP1/EDN1/PTK2B/IL36RN/CXCL1/CXCL2/ANXA1/IL1R1/IL6/IL6R/CXCL8/LGALS3/CCL3L3/CXCL9/MPP1/PTGER4/CCL3/CCL3L1/CCL8/CCL14/CCL20/CCL22/CXCL5/THBS1/VEGFA/PLA2G7	CD300A/JAML/CCR7/CMKLR1/CD200R1/CSF1/CSF3R/CXADR/CYP19A1/DUSP1/EDN1/EDNRB/ANO6/AIF1/FCER1G/FLT1/PLCB1/FPR2/MCOLN2/STAP1/IL36RN/IL36B/C5AR2/CXCL1/CXCL2/CXCL3/IL1B/IL1R1/IL6/CXCL8/CXCR1/CXCR2/ITGA9/ITGB2/KIT/LGALS3/MIF/MMP14/CKLF/PDE4B/PDE4D/IL23A/PECAM1/PGF/TREM2/LGMN/PRTN3/SLAMF8/PTGER4/MTUS1/RAC1/RAC2/TRPV4/S100A8/S100A9/S100A12/CCL3/CCL3L1/CCL4/CCL18/CCL22/CXCL5/CX3CL1/SYK/THBS1/VEGFA/ARHGEF5/D…	EDN1/MCOLN2/STAP1/CXCL1/CXCL2/IL1B/IL1RN/IL6/CXCL8/CXCL10/CCL4L1/CCL3L3/CXCL9/CKLF/PECAM1/IL36G/CCL2/CCL3/CCL3L1/CCL7/CCL8/CCL14/CCL20/CXCL11/CXCL5/C5AR1/CCR2	IL23A/CCL20/CSF1/CCL22/IL6/PDE4B/MCOLN2/EDN1/CXCL8/IL1B/CCL19/IL36G/CXCL5/CXCL1/IL36RN/CXCL3/XCL1/CD9/MPP1/PLA2G7/LGALS3/SIRPA/ITGB2/TREM2/CCR1/CMKLR1/C3AR1/C5AR1/FCER1G/LGMN/IL17RA/CSF3R/LYN/DYSF/THBS1/PECAM1/SLAMF8/CX3CR1/ANXA1	CD200R1/CSF1/DUSP1/EDN1/IL36RN/C5AR2/CXCL1/CXCL2/NCKAP1L/IL1B/IL1RN/IL6/CXCL8/CCL4L1/CCL3L3/P2RX4/PIK3CG/IL36G/SLAMF8/PTGER4/PTPRO/CCL1/CCL2/CCL3/CCL3L1/CCL4/CCL5/CCL20/SYK/NUP85/CD99L2	CSF1/EDN1/CXCL2/IL1B/IL1RN/IL6/CXCL10/CCL4L1/SERPINE1/PDGFB/IL23A/S100A8/S100A9/CCL3/CCL3L1/CCL4/CCL5/CCL7/CCL20	NUP85/AKIRIN1/VEGFB/VEGFA/VAV1/C5AR1/THBS1/SYK/CCL22/CCL20/CCL15/CCL14/CCL5/CCL4/CCL3L1/CCL3/PREX1/PTGER4/IL36G/PIK3CD/PECAM1/IL23A/PDE4B/CKLF/P2RX4/MPP1/CD200/MMP14/CXCL9/CCL4L1/CXCR1/CXCL8/IL1RN/IL1B/HRH1/HMGB1/ADGRE2/NCKAP1L/CXCL3/CXCL1/MCOLN2/PTK2B/AIF1/DUSP1/CSF1/MAPK14/SIRPA/CD200R1/CCR7/JAML
response to interferon-gamma	IFNG/STAT1/PARP9/SOCS1/SOCS3	NR1H3/CDC42EP2/IFI30/IFITM2/GBP4/GBP5/DAPK3/GBP6/EDN1/AIF1/RAB12/FCGR1B/RPL13A/GAPDH/GBP3/GCH1/GSN/HCK/HLA-A/HLA-B/HLA-C/HLA-DPB1/HLA-DQB2/HLA-DRB1/HLA-G/ICAM1/IRF8/IFNG/IL12B/IRF4/IRF5/JAK1/JAK2/KIF5B/ARG1/GBP7/MEFV/OAS1/OAS3/TRIM34/PARP14/MED1/KIF16B/RAB20/PRKCD/PTAFR/CCL3/CCL3L1/CCL4/CCL18/CCL22/CX3CL1/SLC26A6/SP100/STXBP2/STXBP3/ACTG1/TXK/ACOD1/VCAM1/TRIM25/ZYX/CAMK2A/CAMK2B/TRIM5/OASL/SOCS1/…	TRIM22/IRF9/IFITM3/IFI30/IFITM2/GBP4/GBP5/EDN1/GBP1/GCH1/IRF8/IFNG/IL12B/IRF1/IRF7/CCL4L1/CCL3L3/MT2A/OAS1/OAS2/OAS3/NUB1/PML/PARP14/SHFL/CCL2/CCL3/CCL3L1/CCL7/CCL8/CCL14/CCL20/SLC26A6/TRIM21/STAT1/BST2/ACOD1/WAS/TRIM25/TRIM8/PARP9/IFITM1/TRIM5/OASL/SOCS1/SOCS3/NMI	IRF4/IL12B/SOCS1/GBP4/TRIM22/GBP5/CCL20/IRF1/GAPDH/CCL22/PARP14/NLRC5/OAS2/PARP9/EDN1/GBP3/CCL19/OAS3/GBP7/IFNG/XCL1/GSN/MRC1/PTAFR/SIRPA/CXCL16/RAB20/HLA-DPB1/DAPK1/JAK2/TLR4/WAS/VAMP3/PRKCD/FCGR1A	CDC42EP2/TRIM38/CYP27B1/EDN1/EPRS1/RPL13A/CDC42EP4/HCK/RAB7B/IFNGR1/CCL4L1/CCL3L3/CCL1/CCL2/CCL3/CCL3L1/CCL4/CCL5/CCL20/WAS/TRIM8/PIAS1/OASL/SOCS3	EDN1/RAB7B/IL12B/CCL4L1/PTAFR/CCL3/CCL3L1/CCL4/CCL5/CCL7/CCL20	CD58/STX8/CLDN1/SOCS3/KYNU/OASL/IFITM1/NLRC5/PARP9/CAMK2G/TRIM8/TRIM25/WNT5A/BST2/STAT1/SLC26A6/CCL22/CCL20/CCL15/CCL14/CCL5/CCL4/CCL3L1/CCL3/CXCL16/KIF16B/PARP14/NUB1/EVL/OAS3/OAS2/OAS1/LGALS9/GBP7/CCL4L1/IRF7/IRF4/IRF1/IL12B/IFNG/IRF8/RAB7B/ICAM1/HLA-F/SEC61A1/GCH1/GBP3/GBP1/EPRS1/RAB12/AIF1/CYP27B1/SIRPA/GBP5/GBP4/VPS26B/IFITM3
regulation of T-helper cell differentiation	NLRP3/ANXA1/BCL6/NFKBIZ/ZC3H12A/RIPK2/CD86	MALT1/NLRP3/RC3H1/IL27/IL2/IL12B/IL18/IRF4/ZBTB7B/IL23A/RC3H2/BCL6/NFKBIZ/TNFSF4/ZC3H12A/NFKBID/RIPK2/CD80/SOCS5	NLRP3/HLX/IL12B/NFKBIZ/ZC3H12A/RIPK2/CD86	IRF4/IL12B/IL23A/IL4R/ZC3H12A/JAK3/CCL19/TBX21/FOXP3/BCL6/MYB/CD86/ANXA1	MALT1/IL4R/BCL6/NFKBIZ/ZC3H12A/NFKBID/RIPK2/CD80/CD86	MALT1/IL12B/IL23A/NFKBIZ/ZC3H12A/NFKBID/RIPK2	CD86/CD80/RIPK2/NFKBID/TNFSF4/NFKBIZ/BCL6/RARA/IL23A/SMAD7/JAK3/IRF4/IL12B/IL4R/IL27/MALT1
macrophage activation	NAMPT/TLR6/IFNG/IL6/JUN/SUCNR1/CCL3/SLC11A1/THBS1/TLR1/TNF/ZC3H12A/HAVCR2/SPHK1/IL1RL1	NR1H3/CEBPA/VSIG4/IL31RA/CSF2/AIF1/CD93/FPR2/STAP1/FOXP1/GRN/IFNG/IL6/IL13/ITGB2/JAK2/MIF/MMP8/ATM/TLR7/TREM2/PRKCE/SUCNR1/RORA/CCL3/CX3CL1/CRTC3/SYK/THBS1/TLR1/C1QA/TYROBP/ZC3H12A/DYSF/SPHK1/IL1RL1/NR1D1/PJA2	CSF2/TICAM1/STAP1/IFNG/IL6/LDLR/TLR7/CCL3/TNF/C5AR1/TYROBP/ZC3H12A	CD93/IL6/IL4R/ZC3H12A/NAMPT/CSF2/IFNG/SUCNR1/TNIP2/TYROBP/ITGB2/TREM2/C5AR1/CTSC/VSIG4/DYSF/TLR7/THBS1/JAK2/TLR4/FCGR2B/APP	NAMPT/CEBPA/CTSC/CSF2/IFNGR1/IL4R/IL6/MYO18A/ATM/SUCNR1/CCL3/SYK/TLR1/TNF/TNIP2/ZC3H12A/CST7/SPHK1	CSF2/IL6/JUN/CCL3/TNF/ZC3H12A	SPHK1/CST7/TNIP2/WNT5A/TRPV1/C5AR1/TNF/THBS1/SYK/CCL3/ATM/CD200/MYO18A/IL4R/APP/IFNG/AIF1/CSF2/CTSC/CEBPA/NAMPT
positive regulation of MAP kinase activity	TLR6/DUSP5/EDN1/ERN1/PTK2B/IRAK1/IRAK2/GADD45B/P2RX7/MAP2K3/EIF2AK2/PROK2/THBS1/TNF/VEGFA/CXCR4/RIPK2/SPAG9/GDF15/CD40	RASGRP1/NOD1/MAP3K2/FRS2/MAP4K5/AKAP13/PDCD10/IQGAP3/MAP3K8/ADRA2B/GADD45A/DUSP5/DUSP7/EDN1/EPHA4/ERCC6/ERN1/TNIK/TAB2/FLT1/LPAR3/FPR1/TAB3/GHR/DBNL/MDFIC/HGF/HTR2B/IGF1/IL1B/JAK2/KIT/GFRAL/SAMD5/MAP3K15/ARRB1/MAP3K1/MAP3K4/MAP3K5/MIF/MAP3K11/GADD45B/NTRK1/P2RX7/NOX4/PAK1/PDE6G/PDGFA/PRKAA1/INAVA/PKN1/MAP2K2/EIF2AK2/KIDINS220/TAOK1/PTPN11/PROK2/S100A12/NOD2/BMP2/SYK/MAP3K7/TGFA/TGFBR1/THBS1/UBC/U…	MAP3K8/DUSP5/EDN1/MLKL/FPR1/IL1B/IRAK2/MAP3K4/GADD45B/EIF2AK2/AVPI1/TNF/C5AR1/MAPKAPK3/RIPK2/CD40	DUSP5/GADD45B/GADD45G/EDN1/IL1B/EIF2AK2/CCL19/IRAK2/RASGRP1/TRAF2/GADD45A/NOD1/PDGFA/MAP3K8/C5AR1/ZEB2/ARRB1/AVPI1/PDGFC/ADAM9/THBS1/NRG1/JAK2/PAK1/TLR4/TGFBR1	NOD1/MAP4K1/MAP3K8/CRKL/CSK/GADD45A/DUSP5/DUSP6/EDN1/FGD2/IL1B/IRAK2/MAP3K1/MAP3K4/GADD45B/P2RX7/PAK1/PIK3CG/MAP2K3/AVPI1/SRC/SYK/TNF/MAPKAPK3/RIPK2/SPAG9/MAP3K6/CD40/ZEB2	MAP3K8/DUSP5/EDN1/IL1B/IRAK2/PDGFB/MAP2K3/SRC/TNF/RIPK2	CD40/MAGED1/MAP3K13/SPAG9/MAP3K14/RIPK2/CXCR4/WNT5A/VEGFA/C5AR1/TRAF2/TNF/TIAM1/THBS1/TGFA/SYK/SRC/PTPN1/EIF2AK2/MAP2K7/MAP2K6/MAP2K5/MAP2K3/HACD3/PAK1/GADD45B/KITLG/MAP3K5/MAP3K4/MAP3K3/KRAS/IRAK2/INSR/IL1B/FLT3/TAB2/PTK2B/EZH2/DUSP5/GADD45A/CSK/MAPK14/MAP3K8/MAP4K1/MAP4K5/ERP29/NOD1
positive regulation of receptor signaling pathway via STAT	CD300A/CSF1R/PTK2B/IFNG/IL6/IL6R/LIF/MIR221/OSM/TNF/PARP9/SOCS1/SOCS3/CD40	PIBF1/CD300A/IL31RA/CSF1R/CSF2/CLCF1/GHR/HCLS1/HSF1/IFNG/IGF1/IL2/IL3/IL6/IL6ST/IL7R/IL10RB/IL12A/IL12B/IL13/IL15/IL18/JAK2/KIT/LIF/MGAT5/OSM/IL23A/PECAM1/PARP14/STAP2/PRLR/PTK6/CRLF2/TNFRSF1A/SOCS1/CD40	CSF1R/CSF2/CLCF1/IFNG/IL6/IL12B/PECAM1/PARP14/TNF/PARP9/SOCS1/SOCS3/CD40	IL12B/SOCS1/IL23A/TNFRSF18/PARP14/IL6/PARP9/CSF2/LIF/IFNG/LYN/CSF1R/JAK2/PECAM1/TNFRSF1A	CSF1R/CSF2/CLCF1/FYN/IL6/IL7R/OSM/CCL5/TNF/TNFRSF1A/TNFRSF18/SOCS3/CD40	CSF2/CLCF1/IL6/IL7R/IL12B/IL23A/CCL5/TNF	CD40/SOCS3/TNFSF18/TNFRSF18/TSLP/PARP9/TNF/CRLF2/CCL5/PARP14/PECAM1/IL23A/IL15/IL12B/IL12A/IL7R/IFNG/CLCF1/FLT3/PTK2B/CSF2/CSF1R
positive regulation of NF-kappaB transcription factor activity	TLR6/TRIM22/NLRP3/CARD16/HSPA1B/ICAM1/IRAK1/IRAK2/EIF2AK2/TNF/TRIM25/TRIM5/RIPK2/SPHK1/CD36/CD40	FLOT1/NOD1/MALT1/MID2/IRAK3/NLRP3/CHUK/CARD16/RTKN2/FER/ERC1/TAB2/TAB3/AMH/PYCARD/HSPA1A/HSPA1B/ICAM1/IL1B/IL18/AR/ITGB2/TRIM37/NFKB1/NPM1/NTRK1/ROR1/PIDD1/EIF2AK2/NLRC4/S100A8/S100A9/S100A12/CX3CL1/NOD2/RNF25/MAP3K7/TRAF1/UBC/UBE2V1/TRIM25/CAMK2A/IKBKG/TRIM5/CAV1/RIPK2/TNFRSF11A/IL18R1/SPHK1/MTDH/CLOCK/CD40/TRIM14	TRIM22/RBCK1/NLRP3/TICAM1/HSPA1A/HSPA1B/IL1B/IRAK2/NFKB1/EIF2AK2/TNF/TRAF1/TRIM25/TRIM8/TRIM5/RIPK2/IL18RAP/CFLAR/CD40	TRIM22/NFKB1/TRAF1/NFKB2/IL1B/EIF2AK2/IRAK2/TRAF2/PRKD2/RBCK1/TRADD/NOD1/ITGB2/NLRC4/LTF/CD36/TLR4/PRDX3/CX3CR1/IRAK3/CAT/APP	NOD1/TRIM38/CARM1/MALT1/FLOT2/PYCARD/RAB7B/IL1B/IRAK2/NFKB1/BTK/TNF/TRAF1/TRIM8/RIPK2/CFLAR/SPHK1/CD40	MALT1/RAB7B/IL1B/IRAK2/S100A8/S100A9/TNF/TRAF1/RIPK2	CD40/CD36/AIM2/MTDH/MAP3K13/TNFSF18/RPS6KA4/SPHK1/CFLAR/IL18R1/RIPK2/CAT/TRIM8/TRIM25/WNT5A/TRAF5/TRAF2/TRAF1/TNF/NLRC4/EIF2AK2/PRKCH/NFKB2/NFKB1/LGALS9/KRAS/IRAK2/IL1RAP/IL1B/APP/RAB7B/ICAM1/PYCARD/TAB2/TRIM32/RHEBL1/CARD16/MALT1/NOD1
response to tumor necrosis factor	CARD16/EDN1/PTK2B/HSPA1B/ICAM1/CXCL8/CCL3L3/ASAH1/CCL3/CCL3L1/CCL8/CCL14/CCL20/CCL22/STAT1/THBS1/TNF/ACOD1/ZFP36/ZC3H12A/DCSTAMP/CASP1/TNFSF14/SPHK1/CD14/CD40/TNFSF15	TANK/ADAM10/CEBPA/EDAR/CHUK/CARD16/CYBA/CYLD/ZNF675/EDN1/ENDOG/HIPK1/F2RL1/SIRT1/PELI3/SGMS1/GBP3/GCH1/GGT1/ANKRD1/GPS2/PYCARD/GSTP1/BIRC2/BIRC3/HSPA1A/HSPA1B/ICAM1/CXCL8/JAK2/KCNJ11/KRT18/AFF3/LIMS1/LTA/LTBR/MAP3K5/ASAH1/NFE2L2/NFKB1/TNFRSF12A/PID1/ERBIN/PSMA7/PSMB3/PSMB4/PSMB6/PSMC1/PSMC4/PSMD4/PSMD8/PSMD13/PTGS2/WDR35/HAMP/RORA/CCL3/CCL3L1/CCL4/CCL18/CCL22/CX3CL1/YTHDC2/SLC2A4/ZFP36L2/SYK/ADAM…	RBCK1/EDN1/GBP1/GCH1/BIRC3/HSPA1A/HSPA1B/CXCL8/CCL4L1/LTA/CCL3L3/NFKB1/NFKBIA/NUB1/PSMB8/PTGS2/CCL2/CCL3/CCL3L1/CCL7/CCL8/CCL14/CCL20/STAT1/TNF/TRAF1/TNFRSF4/ACOD1/ZC3H12A/CD40	TNFRSF9/AKAP12/CCL20/TNFSF15/PTGS2/TNFRSF18/NFKB1/CCL22/TRAF1/NFKBIA/TNFRSF25/OCSTAMP/CD70/TNFAIP3/ZC3H12A/EDN1/TNFRSF4/CXCL8/GBP3/TNFSF14/CCL19/TRAF2/NKX3-1/RBCK1/TRADD/XCL1/CXCL16/CD14/LIMS1/ADAM9/THBS1/LTBR/JAK2/TNFRSF1A/FABP4	CEBPA/OCSTAMP/EDN1/PYCARD/IGBP1/CXCL8/CCL4L1/LTA/CCL3L3/NFKB1/NFKBIA/PSMB5/PSMB8/PSMB10/PSMC5/PTGS2/CCL1/CCL2/CCL3/CCL3L1/CCL4/CCL5/CCL20/ZFP36L1/SYK/TNF/TNFAIP3/TNFRSF1A/TRAF1/TNFRSF4/ZC3H12A/TNFRSF18/SPHK1/TNFSF8/BAG4/CD40/AKAP12	OCSTAMP/EDN1/CCL4L1/LTA/PTGS2/CCL3/CCL3L1/CCL4/CCL5/CCL7/CCL20/TNF/TNFAIP3/TRAF1/TNFRSF4/ZC3H12A/TNFSF14	TNFSF15/HDAC4/CD70/CD58/CD40/BAG4/AIM2/CLDN1/MAP3K14/TNFSF18/SPHK1/TNFRSF18/TNFSF9/TXNDC17/CASP3/TRPV1/TNFRSF4/TNFSF4/TRAF2/TRAF1/TNFAIP3/TNF/THBS1/SYK/ZFP36L2/STAT1/CCL22/CCL20/CCL15/CCL14/CCL5/CCL4/CCL3L1/CCL3/CXCL16/PTGS2/PSME2/MAP2K7/NUB1/TNFRSF11B/NFKBIA/NFKB1/MAP3K5/LTB/CCL4L1/KCNJ11/TNFRSF9/CXCL8/ICAM1/BIRC3/BIRC2/PYCARD/GCH1/GBP3/GBP1/TRIM32/CARD8/PTK2B/GSDME/MAPK14/EDARADD/CARD16/CHI3L1/…
neutrophil migration	EDN1/IL36RN/CXCL1/CXCL2/IL1R1/CXCL8/LGALS3/CCL3L3/CXCL9/MPP1/CCL3/CCL3L1/CCL8/CCL14/CCL20/CCL22/CXCL5	JAML/CCR7/CSF3R/CXADR/EDN1/FCER1G/MCOLN2/IL36RN/IL36B/C5AR2/CXCL1/CXCL2/CXCL3/IL1B/IL1R1/CXCL8/CXCR1/CXCR2/ITGA9/ITGB2/LGALS3/CKLF/PDE4B/PDE4D/IL23A/PECAM1/PRTN3/SLAMF8/RAC1/RAC2/S100A8/S100A9/S100A12/CCL3/CCL3L1/CCL4/CCL18/CCL22/CXCL5/CX3CL1/SYK/DYSF/JAM3/JAGN1	EDN1/MCOLN2/CXCL1/CXCL2/IL1B/IL1RN/CXCL8/CXCL10/CCL4L1/CCL3L3/CXCL9/CKLF/PECAM1/IL36G/CCL2/CCL3/CCL3L1/CCL7/CCL8/CCL14/CCL20/CXCL11/CXCL5/C5AR1	IL23A/CCL20/CCL22/PDE4B/MCOLN2/EDN1/CXCL8/IL1B/CCL19/IL36G/CXCL5/CXCL1/IL36RN/CXCL3/XCL1/MPP1/LGALS3/ITGB2/C3AR1/C5AR1/FCER1G/CSF3R/DYSF/PECAM1/SLAMF8	EDN1/IL36RN/C5AR2/CXCL1/CXCL2/NCKAP1L/IL1B/IL1RN/CXCL8/CCL4L1/CCL3L3/PIK3CG/IL36G/SLAMF8/CCL1/CCL2/CCL3/CCL3L1/CCL4/CCL5/CCL20/SYK/CD99L2	EDN1/CXCL2/IL1B/IL1RN/CXCL10/CCL4L1/IL23A/S100A8/S100A9/CCL3/CCL3L1/CCL4/CCL5/CCL7/CCL20	VAV1/C5AR1/SYK/CCL22/CCL20/CCL15/CCL14/CCL5/CCL4/CCL3L1/CCL3/PREX1/IL36G/PIK3CD/PECAM1/IL23A/PDE4B/CKLF/MPP1/CXCL9/CCL4L1/CXCR1/CXCL8/IL1RN/IL1B/NCKAP1L/CXCL3/CXCL1/MCOLN2/CCR7/JAML
interleukin-1 beta production	TLR6/NLRP3/CARD16/ABCA1/IFI16/IFNG/LPL/CARD17/P2RX7/SUCNR1/CCL3/CLEC7A/ZC3H12A/CASP1/RIPK2/SPHK1/CD36	NOD1/MALT1/LILRA2/NLRP3/CARD16/GBP5/CCR7/ABCA1/F2RL1/PANX1/FOXP1/PYCARD/GSTP1/IFI16/IFNG/IGF1/LILRA5/IL1B/JAK2/LPL/ARRB2/MEFV/CARD17/P2RX7/TREM2/INAVA/SUCNR1/NLRC4/CCL3/CX3CL1/NOD2/CLEC7A/TYROBP/FZD5/ZC3H12A/RIPK2/SPHK1/NLRP12/CD33	NLRP3/GBP5/IFI16/IFNG/IL1B/PML/CCL3/TYROBP/ZC3H12A/RIPK2/NLRP12	GBP5/EGR1/TNFAIP3/ZC3H12A/IL1B/CCL19/IFNG/SUCNR1/NOD1/TYROBP/ACP5/CLEC7A/SIRPA/TREM2/ABCA1/MNDA/NLRC4/ARRB2/JAK2/CD36/TLR4/CX3CR1/CD33/APP	NOD1/MALT1/EGR1/PYCARD/IFI16/IL1B/LPL/P2RX7/ERRFI1/SUCNR1/CCL3/TNFAIP3/GSDMD/ZC3H12A/RIPK2/SPHK1/CD33	MALT1/ABCA1/EGR1/IL1B/ERRFI1/CCL3/TNFAIP3/ZC3H12A/RIPK2	CD36/CD33/AIM2/SPHK1/RIPK2/WNT5A/TNFAIP3/CCL3/NLRC4/ERRFI1/LGALS9/IL1B/LILRA5/APP/IFNG/HMGB1/PYCARD/PANX1/CARD8/SIRPA/CCR7/GBP5/CARD16/MALT1/TRIM16/NOD1
positive regulation of tyrosine phosphorylation of STAT protein	CSF1R/IFNG/IL6/IL6R/LIF/MIR221/OSM/TNF/PARP9/SOCS3/CD40	PIBF1/IL31RA/CSF1R/CSF2/CLCF1/GHR/HCLS1/HSF1/IFNG/IGF1/IL2/IL3/IL6/IL6ST/IL12A/IL12B/IL13/IL15/IL18/JAK2/KIT/LIF/OSM/IL23A/PECAM1/PARP14/STAP2/PTK6/TNFRSF1A/CD40	CSF1R/CSF2/CLCF1/IFNG/IL6/IL12B/PECAM1/PARP14/TNF/PARP9/SOCS3/CD40	IL12B/IL23A/TNFRSF18/PARP14/IL6/PARP9/CSF2/LIF/IFNG/LYN/CSF1R/JAK2/PECAM1/TNFRSF1A	CSF1R/CSF2/CLCF1/FYN/IL6/OSM/CCL5/TNF/TNFRSF1A/TNFRSF18/SOCS3/CD40	CSF2/CLCF1/IL6/IL12B/IL23A/CCL5/TNF	CD40/SOCS3/TNFSF18/TNFRSF18/TSLP/PARP9/TNF/CCL5/PARP14/PECAM1/IL23A/IL15/IL12B/IL12A/IFNG/CLCF1/FLT3/CSF2/CSF1R
ERK1 and ERK2 cascade	SPRY2/CCR1/CSF1R/ADRA1A/CTSH/DUSP1/DUSP3/PTK2B/ICAM1/JUN/LIF/MIR221/CCL3L3/ATF3/PTGER4/CCL3/CCL3L1/CCL8/CCL14/CCL20/CCL22/TNF/HAVCR2/RIPK2/NRP1/CD36/CD44/RAPGEF2	RANBP9/RASGRP1/SPRY1/SPRY2/RAMP3/NOD1/RGS14/FRS2/DUSP10/CCR7/IQGAP3/CSF1R/ADRA1A/CTSH/GLIPR2/CNKSR3/NLRP6/DLG1/DUSP1/DUSP3/DUSP4/GPR183/EPHA2/EPHB1/EPHB2/F2RL1/FLT1/FN1/FPR2/GCNT2/C5AR2/RPS6KA6/GNAI2/PYCARD/GSTP1/HTR2B/ICAM1/IGF1/APOE/IL1B/ITGAV/KIT/TNFAIP8L3/SCIMP/LIF/LRP1/ARRB1/SMAD4/ARRB2/MIF/ATF3/NQO2/NTRK1/NOX4/DNAJC27/PDE8A/PDGFA/PHB/TREM2/NECAB2/MED1/SYNJ2BP/PRKCA/MAP2K2/PTGER4/NDRG2/SEMA6…	CSF1R/GBP1/IL1B/CCL4L1/CCL3L3/MYC/ATF3/CCL2/CCL3/CCL3L1/CCL7/CCL8/CCL14/CCL20/TNF/C5AR1/RIPK2/CFLAR/NLRP12/RAPGEF2	DUSP4/AKAP12/CCL20/SEMA7A/CCL22/TNIP1/IL1B/CCL19/RASGRP1/SLAMF1/PRKD2/LIF/SPRY2/NOD1/PDGFA/XCL1/SIRPA/TREM2/CCR1/C5AR1/ARRB2/NPTN/LYN/ARRB1/CTSH/PDGFC/CSF1R/LRP1/CD36/TLR4/P2RY6/APP	SPRY2/NOD1/CRKL/CSF1R/CSK/CNKSR3/DUSP1/DUSP6/C5AR2/PYCARD/IL1B/TNFAIP8L3/CCL4L1/CCL3L3/ATF3/PHB/ERRFI1/PTGER4/CCL1/CCL2/CCL3/CCL3L1/CCL4/CCL5/CCL20/SRC/ZFP36L1/SYK/TNF/RIPK2/CFLAR/KLF4/SLC9A3R1/AKAP12	IL1B/JUN/CCL4L1/ATF3/PDGFB/ERRFI1/CCL3/CCL3L1/CCL4/CCL5/CCL7/CCL20/SRC/TNF/RIPK2	RAPGEF2/CD36/SLC9A3R1/KLF4/CFLAR/RIPK2/SEMA7A/C5AR1/TNF/TIAM1/SYK/ZFP36L2/SRC/CCL22/CCL20/CCL15/CCL14/CCL5/CCL4/CCL3L1/CCL3/RRAS/RAP1B/PTPN6/PTPN1/PTGER4/MAP2K7/SYNJ2BP/ERRFI1/PHB/PDGFRA/ATF3/SMAD4/LGALS9/CCL4L1/ITGAV/IL1B/APP/FFAR4/ICAM1/HMGB1/PYCARD/GNAI2/GCNT2/GBP1/ABL1/ALOX15/SIRT3/FLT3/PTK2B/FLCN/GPR183/DUSP4/DUSP3/DUSP1/CNKSR3/CCN2/CSK/CSF1R/SIRPA/CCR7/CAVIN3/CHI3L1/RGS14/NOD1/ABCA7/TNIP1
positive regulation of receptor signaling pathway via JAK-STAT	CD300A/CSF1R/PTK2B/IFNG/IL6/IL6R/LIF/MIR221/OSM/TNF/PARP9/SOCS1/SOCS3/CD40	PIBF1/CD300A/IL31RA/CSF1R/CSF2/CLCF1/GHR/HCLS1/HSF1/IFNG/IGF1/IL2/IL3/IL6/IL6ST/IL10RB/IL12A/IL12B/IL13/IL15/IL18/JAK2/KIT/LIF/OSM/IL23A/PECAM1/PARP14/STAP2/PRLR/PTK6/TNFRSF1A/SOCS1/CD40	CSF1R/CSF2/CLCF1/IFNG/IL6/IL12B/PECAM1/PARP14/TNF/PARP9/SOCS1/SOCS3/CD40	IL12B/SOCS1/IL23A/TNFRSF18/PARP14/IL6/PARP9/CSF2/LIF/IFNG/LYN/CSF1R/JAK2/PECAM1/TNFRSF1A	CSF1R/CSF2/CLCF1/FYN/IL6/OSM/CCL5/TNF/TNFRSF1A/TNFRSF18/SOCS3/CD40	CSF2/CLCF1/IL6/IL12B/IL23A/CCL5/TNF	CD40/SOCS3/TNFSF18/TNFRSF18/TSLP/PARP9/TNF/CCL5/PARP14/PECAM1/IL23A/IL15/IL12B/IL12A/IFNG/CLCF1/FLT3/PTK2B/CSF2/CSF1R
response to interleukin-1	EDN1/ANXA1/ICAM1/IL1R1/IL6/CXCL8/IRAK1/IRAK2/CCL3L3/CCL3/CCL3L1/CCL8/CCL14/CCL20/CCL22/ACOD1/ZC3H12A/RIPK2/SQSTM1	TANK/NOD1/CEBPB/IRAK3/CHUK/MAP3K8/RC3H1/CYBA/ZNF675/EDN1/ETS1/TAB2/PLCB1/PELI3/TAB3/GBP3/ANKRD1/GCLC/PYCARD/HNMT/ICAM1/IL1A/IL1B/IL1R1/IL6/CXCL8/MIR101-1/NFKB1/OTUD4/PRKCA/PSMA7/PSMB3/PSMB4/PSMB6/PSMC1/PSMC4/PSMD4/PSMD8/PELI2/PSMD13/RORA/CCL3/CCL3L1/CCL4/CCL18/CCL22/CX3CL1/NOD2/YTHDC2/MAP3K7/TFPI/ACOD1/UBC/UBE2V1/IL1R2/ZC3H12A/IKBKG/KMO/HYAL2/RIPK2/TNFRSF11A/BTRC/CD38/NR1D1/AKAP12	MAP3K8/EDN1/GBP1/IL1A/IL1B/IL1RN/IL6/CXCL8/IRAK2/CCL4L1/CCL3L3/NFKB1/NFKBIA/PSMB8/CCL2/CCL3/CCL3L1/CCL7/CCL8/CCL14/CCL20/ACOD1/ZC3H12A/RIPK2/CD38	AKAP12/EGR1/CCL20/NFKB1/CCL22/NFKBIA/IL6/ZC3H12A/EDN1/CXCL8/CD38/IL1B/GBP3/CCL19/IRAK2/NKX3-1/NOD1/MAPK13/XCL1/TNIP2/MAP3K8/TFPI/SIRPA/HNMT/GCLC/IL1R2/CEBPB/IRAK3/ANXA1/APP	NOD1/MAP3K8/EDN1/EGR1/PYCARD/IGBP1/IL1A/IL1B/IL1RN/IL6/CXCL8/IRAK2/CCL4L1/CCL3L3/MTHFR/NFKB1/NFKBIA/MAPK13/PSMB5/PSMB8/PSMB10/PSMC5/CCL1/CCL2/CCL3/CCL3L1/CCL4/CCL5/CCL20/SRC/YY1/TNIP2/ZC3H12A/KMO/RIPK2/AKAP12	MAP3K8/EDN1/EGR1/IL1A/IL1B/IL1RN/IL6/IRAK2/CCL4L1/CCL3/CCL3L1/CCL4/CCL5/CCL7/CCL20/SRC/ZC3H12A/RIPK2	HDAC4/CD38/RPS6KA4/BTRC/RIPK2/KMO/CUL1/TNIP2/YY1/VRK2/TFPI/SRC/CCL22/CCL20/CCL15/CCL14/CCL5/CCL4/CCL3L1/CCL3/PSME2/PELI1/MAPK13/NFKBIA/NFKB1/MAP3K3/LGALS9/CCL4L1/IRAK2/CXCL8/IL1RN/IL1RAP/IL1B/IL1A/APP/ICAM1/HNMT/PYCARD/GBP3/GBP1/TAB2/SIRPA/MAP3K8/CHI3L1/CEBPB/NOD1/KLF2/TANK
positive regulation of interleukin-2 production	ANXA1/CLEC7A/RIPK2/CD83/CD86	MALT1/IL1A/IL1B/IRF4/PDE4B/PDE4D/SASH3/CLEC7A/SPTBN1/MAP3K7/RUNX1/RIPK2/CD28/CD80	IL1A/IL1B/CCR2/RIPK2/CD83/CD86	IRF4/PDE4B/CD83/IL1B/TRAF2/PRKD2/CLEC7A/CD86/ANXA1	MALT1/IL1A/IL1B/SASH3/RIPK2/CD83/CD80/CD86	MALT1/IL1A/IL1B/RIPK2	CD86/CD80/CD83/RIPK2/TRAF2/SPTBN1/SASH3/PDE4B/IRF4/IL1B/IL1A/ABL1/MALT1
positive regulation of T-helper cell differentiation	NLRP3/ANXA1/NFKBIZ/RIPK2/CD86	MALT1/NLRP3/IL12B/IL18/IL23A/NFKBIZ/TNFSF4/NFKBID/RIPK2/CD80/SOCS5	NLRP3/HLX/IL12B/NFKBIZ/RIPK2/CD86	IL12B/IL23A/IL4R/CCL19/MYB/CD86/ANXA1	MALT1/IL4R/NFKBIZ/NFKBID/RIPK2/CD80/CD86	MALT1/IL12B/IL23A/NFKBIZ/NFKBID/RIPK2	CD86/CD80/RIPK2/NFKBID/TNFSF4/NFKBIZ/RARA/IL23A/IL12B/IL4R/MALT1
interleukin-6 production	TLR6/IL36RN/IL6/IL6R/LPL/MBP/P2RX7/AKIRIN2/CARD9/CLEC7A/TLR1/TNF/RIPK2/CD36	LILRB2/NOD1/SPON2/CEBPB/LILRA2/IRAK3/CD200R1/CYBA/AIF1/F2RL1/FCER1G/DDX58/IL36RN/IL36B/C5AR2/RABGEF1/PYCARD/HGF/LILRA5/IL1B/IL6/IL18/SIGLEC16/LPL/ARRB1/ARRB2/MMP8/P2RX7/PAEP/TLR7/TREM2/INAVA/PTAFR/PTPN11/TRPV4/CX3CL1/NOD2/AZI2/CLEC7A/SYK/TLR1/TNFSF4/TYROBP/UCN/ZC3H12A/HYAL2/RIPK2/NLRP12/SOCS5	TICAM1/DDX58/IL1B/IL1RN/IL6/TLR7/IL36G/IFIH1/TNF/TYROBP/ZC3H12A/RIPK2/IL18RAP/NLRP12	IL6/EREG/TNFAIP3/ZC3H12A/IL1B/IL36G/SLAMF1/IL36RN/ZBTB20/FOXP3/NOD1/MAPK13/TYROBP/CLEC7A/PTAFR/SIRPA/TREM2/FCER1G/ARRB2/ARRB1/TLR7/CEBPB/CD36/TLR4/IRAK3/SIGLEC16/APP	NOD1/CD200R1/CSK/IL36RN/C5AR2/RABGEF1/PYCARD/NCKAP1L/RAB7B/IL1B/IL1RN/IL6/INPP5D/LPL/MBP/P2RX7/MAPK13/IL36G/SPHK2/SELENOK/CARD9/SYK/TLR1/TNF/TNFAIP3/ZC3H12A/RIPK2	RAB7B/IL1B/IL1RN/IL6/PTAFR/TNF/TNFAIP3/ZC3H12A/RIPK2	CD36/IL27RA/RIPK2/TSLP/NLRX1/WNT5A/TNFSF4/TNFAIP3/TNF/SYK/CARD9/IFIH1/PTPN6/IL36G/MAPK13/CD200/MBP/LGALS9/INPP5D/IL1RN/IL1RAP/IL1B/LILRA5/APP/RAB7B/HMGB1/NCKAP1L/PYCARD/RABGEF1/ZBTB20/EREG/AIF1/CSK/SIRPA/CD200R1/CEBPB/NOD1/KLF2
response to virus	TRIM22/IFITM3/IFI44/SERINC3/IFI44L/NLRP3/HMGA1/IFI16/IFIT2/IFIT1/IFIT3/IFNG/IL6/IRF7/CXCL9/MX1/MX2/OAS1/OAS2/OAS3/HERC5/PLSCR1/EIF2AK2/ZC3HAV1/CCL8/CCL22/RTP4/CARD9/STAT1/TNF/TRIM25/CXCR4/ZC3H12A/PARP9/TRIM5/OASL/RSAD2/CD40/ISG15	ABCC9/CDK6/SPON2/DDX17/NPC2/IFITM2/ZMYND11/LILRB1/IFI44L/PIM2/IRAK3/LYST/NLRP3/CHUK/AP1S1/DTX3L/CYP1A1/IFNLR1/DDX3X/DHX36/APOBEC3A/UNC13D/ENO1/ERCC6/F2RL1/FMR1/PUM2/DDX58/IFIT5/IL27/ELMOD2/ANKRD17/GBP3/SETD2/PYCARD/TBK1/BIRC2/BIRC3/IFI16/IFIT2/IFIT1/IFIT3/IFNB1/IFNG/IL1B/IL6/IL10RB/IL12A/IL12B/IL15/IRF5/BTBD17/LGALS8/MX1/OAS1/OAS3/OPRK1/NT5C3A/TLR7/IL23A/POLR3K/PMAIP1/TRIM34/EXOSC4/RNF125/PPM1B/N…	ADAR/TRIM22/IRF9/IFITM3/IFI44/IFITM2/IFI44L/PIM2/NLRP3/TICAM1/APOBEC3A/DDX58/IFIT5/IFI6/GBP1/BIRC3/IFI16/IFIT2/IFIT1/IFIT3/IFNB1/IFNG/IL1B/IL2RA/IL6/IL12B/CXCL10/IRF1/IRF7/ISG20/CXCL9/MX1/MX2/OAS1/OAS2/OAS3/HERC5/NT5C3A/TLR7/PLSCR1/PMAIP1/PML/SHFL/PRF1/DDX60/EIF2AK2/CCL8/RTP4/IFIH1/STAT1/STAT2/BST2/TNF/TRIM25/DHX58/ZC3H12A/PARP9/IFITM1/TRIM5/OASL/RSAD2/CD40/ISG15	IL2RA/DDIT4/IL12B/RSAD2/IL23A/TRIM22/MX1/ISG20/DDX60/ENO1/IRF1/CCL22/CDK6/APOBEC3G/PMAIP1/BCL2/IL6/NLRC5/TNFAIP3/OAS2/ZC3H12A/PARP9/BNIP3/HERC5/IL1B/GBP3/EIF2AK2/CCL19/BATF3/IFIT1/OAS3/IFIT3/TBX21/RTP4/IFIT5/IFI44L/IFNG/FOXP3/ISG15/ODC1/XCL1/FGL2/NPC2/SAMHD1/TLR7/RNASE6/UNC93B1/IFNAR2/FGR/IRAK3	TRIM38/APOBEC3A/PUM2/SIN3A/LSM14A/PYCARD/CNOT7/IFI16/IFIT2/IFNAR1/IFNGR1/IL1B/IL6/ISG20/POLR3K/BATF3/POLR3B/SELENOK/RNASEL/CCL4/CCL5/FAM111A/CARD9/SRC/TNF/TNFAIP3/ZC3H12A/OASL/URI1/RSAD2/SLFN11/CD40	IFIT2/IFIT1/IFIT3/IFNB1/IL1B/IL6/IL12B/CXCL10/IL23A/DDIT4/CCL4/CCL5/SRC/TNF/TNFAIP3/ZC3H12A	ISG15/CD40/AIM2/SLFN11/RSAD2/MAP3K14/OASL/IFITM1/NLRC5/PARP9/NLRX1/DHX58/CXCR4/TRIM25/TNFSF4/TNFAIP3/TNF/BST2/STAT2/STAT1/SRC/POLR3D/CARD9/IFIH1/RTP4/FAM111A/CCL22/CCL5/CCL4/APOBEC3G/BCL2/AICDA/EXOSC5/DNAJC3/EIF2AK2/POLR3B/NPLOC4/DDX60/RNF125/DDIT4/PMAIP1/PLSCR1/IL23A/NT5C3A/HERC5/CD207/OAS3/OAS2/OAS1/MX2/EIF2AK4/MMP12/CXCL9/LGALS9/STMN1/ISG20/IRF7/IRF1/IL15/IL12B/IL12A/IL2RA/IL1B/IFNG/IFI27/BIRC…
negative regulation of viral life cycle	IFITM3/IFI16/IFIT1/MIR221/MX1/OAS1/OAS3/PLSCR1/RESF1/EIF2AK2/ZC3HAV1/CCL8/TNF/TRIM25/ZC3H12A/TRIM5/OASL/RSAD2/ISG15	TRIM28/IFITM2/MID2/APOBEC3A/TASOR/IFIT5/GSN/IFI16/IFIT1/IFNB1/BTBD17/MX1/OAS1/OAS3/RESF1/EIF2AK2/PROX1/ZC3HAV1/AICDA/PTX3/FAM111A/SRPK1/TRIM25/ZC3H12A/HMGA2/TRIM5/OASL/RSAD2/ISG15	IFITM3/IFITM2/APOBEC3A/IFIT5/IFI16/IFIT1/IFNB1/ISG20/MX1/OAS1/OAS3/PLSCR1/PML/SHFL/EIF2AK2/CCL8/TRIM21/BST2/TNF/TRIM25/ZC3H12A/TRIM8/PARP10/IFITM1/TRIM5/OASL/RSAD2/ISG15	RSAD2/MX1/ISG20/APOBEC3G/TNIP1/ZC3H12A/EIF2AK2/IFIT1/OAS3/IFIT5/ISG15/PARP10/GSN/FCN1/LTF	APOBEC3A/IFI16/ISG20/RNASEL/CCL5/FAM111A/TNF/ZC3H12A/TRIM8/OASL/RSAD2	FCN1/IFIT1/IFNB1/CCL5/TNF/ZC3H12A	ISG15/RSAD2/OASL/IFITM1/PARP10/TRIM8/TRIM25/TNF/BST2/FAM111A/CCL5/APOBEC3G/TRIM27/AICDA/EIF2AK2/PLSCR1/OAS3/OAS1/EIF2AK4/ISG20/APOBEC3C/IFIT5/TASOR/TRIM32/APOBEC3A/IFITM3/TNIP1

[truncated: 14 more sheets: Table S10, Table S11, Table S12, Table S13, Table S14, Table S15, Table S16, Table S17, Table S18, Table S19, Table S20, Table S21, Table S22, Table S23]
